# Supplementary material
Source: PubMed Central journal article supplement (PMC4941619)
Supplement: NIHMS775743-supplement-4.pdf [file NIHMS775743-supplement-4.pdf]

Lists of Differentially Expressed Genes

- SupplTable2A** SSAP\_1422 - List of genes with average fold change ( $\geq 2$ ) and statistical significance ( $< 0.05$ ) by DESeq2 analysis comparing syndromic and sporadic SSA/Ps to normal right colon. Includes normalized read counts for each group.
- SupplTable2B** HP\_711 - List of genes with average fold change ( $\geq 2$ ) and statistical significance ( $< 0.05$ ) by DESeq2 analysis comparing HPs to normal left colon. Includes normalized read counts for each group.
- SupplTable2C** TopFold27 - List of 27 genes highly expressed in SSA/Ps. Shows average fold change for adenomatous polyp, hyperplastic polyp, sporadic SSA/P and syndromic SSA/P compared to normal colon. Includes normalized read counts for all control colon groups.
- SupplTable2D** Classifier28 - List of 28 genes that accurately classify SSA/P and HPs. Shows average normalized read counts for 21 SSA/Ps and 10 HPs and relative expression ratio of SSA/P compared to HP.
- SupplTable2E** Signature51 - List of 51 signature genes with full gene description
