# Supplementary material
Source: PubMed Central journal article supplement (PMC4941619)
Supplement: NIHMS775743-supplement-5.pdf [file NIHMS775743-supplement-5.pdf]

| Ensembl_Name    | Gene_Symbol   | SSA/P_syndromi |       |          | SSA/P_sporadi |       |          | ControlRight |
|-----------------|---------------|----------------|-------|----------|---------------|-------|----------|--------------|
|                 |               | c_Fold         | c_FDR | ic_RPKM  | c_Fold        | c_FDR | c_RPKM   |              |
| ENSG00000161798 | AQP5          | 40.429         | 0.000 | 11.259   | 13.786        | 0.000 | 7.458    | 0.021        |
| ENSG00000129451 | KLK10         | 37.774         | 0.000 | 59.784   | 14.670        | 0.000 | 21.146   | 0.161        |
| ENSG00000101842 | VSIG1         | 37.510         | 0.000 | 25.402   | 16.105        | 0.000 | 20.345   | 0.116        |
| ENSG00000196188 | CTSE          | 29.916         | 0.000 | 330.744  | 9.675         | 0.000 | 200.758  | 6.225        |
| ENSG00000137699 | TRIM29        | 29.447         | 0.000 | 10.209   | 10.139        | 0.000 | 6.653    | 0.142        |
| ENSG00000005001 | PRSS22        | 26.161         | 0.000 | 24.718   | 6.594         | 0.000 | 14.927   | 0.476        |
| ENSG00000167757 | KLK11         | 21.140         | 0.000 | 31.144   | 7.794         | 0.000 | 17.992   | 1.003        |
| ENSG00000160182 | TFF1          | 20.613         | 0.000 | 2595.518 | 8.327         | 0.000 | 1917.505 | 68.986       |
| ENSG00000120875 | DUSP4         | 19.944         | 0.000 | 8.138    | 7.512         | 0.000 | 5.620    | 0.290        |
| ENSG00000134193 | REG4          | 18.690         | 0.000 | 1785.435 | 7.658         | 0.000 | 1240.582 | 53.025       |
| ENSG00000179546 | HTR1D         | 18.282         | 0.000 | 10.071   | 8.267         | 0.000 | 8.304    | 0.135        |
| ENSG00000206075 | SERPIN5       | 17.937         | 0.000 | 53.311   | 7.640         | 0.000 | 40.925   | 0.834        |
| ENSG00000222636 | RN7SKP54      | 17.621         | 0.000 | 384.688  | 6.320         | 0.000 | 245.566  | 10.483       |
| ENSG00000172031 | EPHX4         | 17.261         | 0.000 | 3.648    | 6.193         | 0.000 | 2.843    | 0.093        |
| ENSG00000168427 | KLHL30        | 16.880         | 0.000 | 1.410    | 6.547         | 0.000 | 1.368    | 0.032        |
| ENSG00000160181 | TFF2          | 16.695         | 0.000 | 120.280  | 5.888         | 0.000 | 56.896   | 1.907        |
| ENSG00000189433 | GJB4          | 16.580         | 0.000 | 3.908    | 6.859         | 0.000 | 2.515    | 0.038        |
| ENSG00000244503 | RP11-278L15.6 | 15.945         | 0.000 | 0.839    | 4.112         | 0.000 | 0.786    | 0.006        |
| ENSG00000189280 | GJB5          | 15.842         | 0.000 | 10.977   | 5.337         | 0.000 | 7.996    | 0.056        |
| ENSG00000255811 | RP1-34M23.5   | 15.770         | 0.000 | 6.448    | 8.997         | 0.000 | 4.006    | 0.049        |
| ENSG00000129455 | KLK8          | 15.728         | 0.000 | 4.556    | 6.071         | 0.000 | 1.987    | 0.014        |
| ENSG00000124233 | SEM61         | 15.525         | 0.000 | 3.735    | 4.429         | 0.000 | 3.374    | 0.068        |
| ENSG00000214039 | RP11-474D1.3  | 15.272         | 0.000 | 0.765    | 8.200         | 0.000 | 0.786    | 0.013        |
| ENSG00000147206 | NXF3          | 15.008         | 0.000 | 5.855    | 5.802         | 0.000 | 4.158    | 0.127        |
| ENSG00000111700 | SLCO1B3       | 14.967         | 0.000 | 1.770    | 4.495         | 0.000 | 0.371    | 0.013        |
| ENSG00000257588 | RP11-469H8.6  | 14.889         | 0.000 | 0.653    | 11.141        | 0.000 | 0.504    | 0.000        |
| ENSG00000146038 | DCDC2         | 14.394         | 0.000 | 5.650    | 5.520         | 0.000 | 3.772    | 0.242        |
| ENSG00000163993 | S100P         | 14.294         | 0.000 | 327.022  | 10.247        | 0.000 | 231.640  | 12.946       |
| ENSG00000062038 | CDH3          | 14.227         | 0.000 | 10.935   | 6.819         | 0.000 | 7.568    | 0.137        |
| ENSG00000230316 | FEZF1-AS1     | 14.209         | 0.000 | 2.826    | 7.305         | 0.000 | 2.203    | 0.018        |
| ENSG00000131910 | NR0B2         | 14.160         | 0.000 | 6.955    | 5.157         | 0.000 | 4.241    | 0.302        |
| ENSG00000135480 | KRT7          | 14.075         | 0.000 | 3.605    | 5.579         | 0.000 | 2.152    | 0.082        |
| ENSG00000087916 | SLC6A14       | 13.967         | 0.000 | 8.835    | 8.880         | 0.000 | 9.207    | 0.144        |
| ENSG00000139515 | PDX1          | 13.696         | 0.000 | 3.708    | 6.154         | 0.000 | 2.844    | 0.171        |
| ENSG00000257046 | LST3          | 13.630         | 0.000 | 1.121    | 3.819         | 0.001 | 0.266    | 0.011        |
| ENSG00000198203 | SULT1C2       | 13.470         | 0.000 | 18.474   | 7.137         | 0.000 | 13.938   | 0.361        |
| ENSG00000115507 | OTX1          | 12.713         | 0.000 | 0.249    | 10.745        | 0.000 | 0.221    | 0.003        |
| ENSG00000124157 | SEM62         | 12.671         | 0.000 | 0.490    | 4.326         | 0.000 | 0.558    | 0.000        |
| ENSG00000167767 | KRT80         | 12.591         | 0.000 | 1.446    | 5.349         | 0.000 | 0.815    | 0.071        |
| ENSG00000253368 | TRNP1         | 12.565         | 0.000 | 9.249    | 6.487         | 0.000 | 6.129    | 0.410        |
| ENSG00000112559 | MDF1          | 12.535         | 0.000 | 5.411    | 5.199         | 0.000 | 2.779    | 0.307        |
| ENSG00000213022 | KLK9          | 12.056         | 0.000 | 0.564    | 5.746         | 0.000 | 0.256    | 0.000        |
| ENSG00000235884 | LINC00941     | 12.046         | 0.000 | 0.513    | 7.393         | 0.000 | 0.314    | 0.010        |
| ENSG00000124143 | ARHGAP40      | 11.973         | 0.000 | 0.394    | 5.211         | 0.000 | 0.150    | 0.000        |
| ENSG00000188910 | GJB3          | 11.894         | 0.000 | 19.847   | 7.857         | 0.000 | 12.655   | 1.161        |
| ENSG00000169876 | MUC17         | 11.624         | 0.000 | 87.478   | 4.505         | 0.000 | 58.554   | 2.631        |
| ENSG00000157064 | NMNAT2        | 11.559         | 0.000 | 0.816    | 3.851         | 0.000 | 0.367    | 0.049        |
| ENSG00000257671 | RP3-416H24.1  | 11.495         | 0.000 | 2.529    | 6.673         | 0.000 | 1.446    | 0.050        |
| ENSG00000162366 | PDZK1IP1      | 11.446         | 0.000 | 152.209  | 7.234         | 0.000 | 94.099   | 9.664        |
| ENSG00000139800 | ZIC5          | 11.229         | 0.000 | 0.960    | 2.387         | 0.055 | 0.993    | 0.004        |
| ENSG00000128610 | FEZF1         | 11.192         | 0.000 | 0.822    | 7.462         | 0.000 | 0.438    | 0.003        |
| ENSG00000196260 | SFTA2         | 10.605         | 0.000 | 0.910    | 5.309         | 0.000 | 0.448    | 0.021        |
| ENSG00000043355 | ZIC2          | 10.348         | 0.000 | 1.729    | 2.566         | 0.031 | 1.340    | 0.043        |
| ENSG00000112299 | VNN1          | 10.054         | 0.000 | 19.154   | 5.214         | 0.000 | 19.623   | 0.573        |
| ENSG00000183900 | AC099522.1    | 10.045         | 0.000 | 2.058    | 4.867         | 0.000 | 1.365    | 0.102        |
| ENSG00000228705 | LINC00659     | 10.035         | 0.000 | 2.180    | 4.231         | 0.000 | 1.443    | 0.069        |
| ENSG00000170786 | SDR16C5       | 9.977          | 0.000 | 33.464   | 7.215         | 0.000 | 23.794   | 2.268        |
| ENSG00000102854 | MSLN          | 9.912          | 0.000 | 13.664   | 6.908         | 0.000 | 9.104    | 0.914        |
| ENSG00000184292 | TACSTD2       | 9.900          | 0.000 | 9.002    | 5.698         | 0.000 | 7.363    | 0.467        |
| ENSG00000188100 | FAM25A        | 9.803          | 0.000 | 2.749    | 6.768         | 0.000 | 1.126    | 0.016        |
| ENSG00000175592 | FOSL1         | 9.689          | 0.000 | 2.054    | 5.590         | 0.000 | 1.106    | 0.119        |
| ENSG00000124102 | PI3           | 9.644          | 0.000 | 180.772  | 3.727         | 0.000 | 185.430  | 11.121       |
| ENSG00000254166 | CASC19        | 9.589          | 0.000 | 2.357    | 8.384         | 0.000 | 2.136    | 0.018        |
| ENSG00000248538 | RP11-10A14.5  | 9.425          | 0.000 | 0.747    | 7.401         | 0.000 | 0.617    | 0.014        |
| ENSG00000181652 | ATG9B         | 9.411          | 0.000 | 2.595    | 6.512         | 0.000 | 1.778    | 0.214        |
| ENSG00000196091 | MYBPC1        | 9.330          | 0.000 | 2.183    | 6.778         | 0.000 | 1.666    | 0.085        |
| ENSG00000247844 | CCAT1         | 9.255          | 0.000 | 2.978    | 6.672         | 0.000 | 2.119    | 0.177        |
| ENSG00000105464 | GRIN2D        | 9.143          | 0.000 | 4.169    | 5.462         | 0.000 | 2.751    | 0.257        |
| ENSG00000247993 | RP11-79P5.2   | 9.093          | 0.000 | 6.296    | 4.571         | 0.000 | 4.320    | 0.294        |
| ENSG00000163347 | CLDN1         | 8.953          | 0.000 | 8.830    | 4.689         | 0.000 | 4.490    | 0.789        |
| ENSG00000168631 | DPCR1         | 8.922          | 0.000 | 0.989    | 4.934         | 0.000 | 0.898    | 0.023        |
| ENSG00000237223 | SULT1C2P1     | 8.892          | 0.000 | 1.385    | 3.929         | 0.000 | 1.019    | 0.028        |
| ENSG00000205922 | ONECUT3       | 8.860          | 0.000 | 0.903    | 1.488         | 0.481 | 0.074    | 0.002        |

|                 |                |       |       |         |       |       |         |        |
|-----------------|----------------|-------|-------|---------|-------|-------|---------|--------|
| ENSG00000100557 | C14orf105      | 8.839 | 0.000 | 0.271   | 2.598 | 0.032 | 0.058   | 0.008  |
| ENSG00000167653 | PSCA           | 8.786 | 0.000 | 18.824  | 5.295 | 0.000 | 25.895  | 0.087  |
| ENSG00000134757 | DSG3           | 8.737 | 0.000 | 1.318   | 6.870 | 0.000 | 1.233   | 0.032  |
| ENSG00000251493 | FOXD1          | 8.684 | 0.000 | 1.506   | 4.573 | 0.000 | 0.729   | 0.000  |
| ENSG00000198807 | PAX9           | 8.577 | 0.000 | 0.453   | 5.692 | 0.000 | 0.293   | 0.032  |
| ENSG00000177508 | IRX3           | 8.549 | 0.000 | 0.354   | 5.354 | 0.000 | 0.221   | 0.017  |
| ENSG00000223458 | RP11-332E3.2   | 8.429 | 0.000 | 3.912   | 2.031 | 0.123 | 1.871   | 0.226  |
| ENSG00000184956 | MUC6           | 8.193 | 0.000 | 3.355   | 1.775 | 0.224 | 1.723   | 0.181  |
| ENSG00000221947 | XKR9           | 8.135 | 0.000 | 2.494   | 6.267 | 0.000 | 2.656   | 0.189  |
| ENSG00000088836 | SLC4A11        | 8.095 | 0.000 | 1.827   | 5.631 | 0.000 | 1.240   | 0.181  |
| ENSG00000178597 | PSAPL1         | 8.037 | 0.000 | 0.224   | 4.633 | 0.000 | 0.172   | 0.000  |
| ENSG00000119547 | ONECUT2        | 7.874 | 0.000 | 0.594   | 5.541 | 0.000 | 0.675   | 0.050  |
| ENSG00000163064 | EN1            | 7.845 | 0.000 | 0.211   | 2.583 | 1.000 | 0.219   | 0.000  |
| ENSG00000198835 | GJC2           | 7.745 | 0.000 | 1.192   | 6.326 | 0.000 | 0.973   | 0.109  |
| ENSG00000245694 | CRNDE          | 7.701 | 0.000 | 1.010   | 5.952 | 0.000 | 0.783   | 0.077  |
| ENSG00000178734 | C13orf45       | 7.603 | 0.000 | 1.838   | 2.198 | 0.047 | 1.099   | 0.153  |
| ENSG00000167105 | TMEM92         | 7.576 | 0.000 | 10.290  | 5.157 | 0.000 | 6.877   | 1.137  |
| ENSG00000137673 | MMP7           | 7.427 | 0.000 | 0.916   | 4.558 | 0.000 | 0.905   | 0.040  |
| ENSG00000165376 | CLDN2          | 7.413 | 0.000 | 6.033   | 4.333 | 0.000 | 5.047   | 0.350  |
| ENSG00000116254 | CHD5           | 7.403 | 0.000 | 0.211   | 4.675 | 0.000 | 0.284   | 0.017  |
| ENSG00000181791 | AC009041.1     | 7.395 | 0.000 | 5.172   | 6.977 | 0.000 | 5.889   | 0.092  |
| ENSG00000259439 | RP11-89K21.1   | 7.324 | 0.000 | 0.412   | 2.021 | 0.145 | 0.352   | 0.021  |
| ENSG00000159263 | SIM2           | 7.272 | 0.000 | 1.158   | 4.275 | 0.000 | 0.942   | 0.119  |
| ENSG00000172927 | MYEOV          | 7.208 | 0.000 | 16.521  | 5.303 | 0.000 | 11.952  | 1.643  |
| ENSG00000163817 | SLC6A20        | 7.189 | 0.000 | 12.003  | 4.121 | 0.000 | 9.650   | 1.158  |
| ENSG00000142661 | MYOM3          | 7.184 | 0.000 | 2.573   | 5.782 | 0.000 | 2.062   | 0.274  |
| ENSG00000173432 | SAA1           | 7.172 | 0.000 | 5.055   | 3.246 | 0.004 | 4.473   | 0.132  |
| ENSG00000084734 | GCKR           | 7.152 | 0.000 | 0.366   | 4.163 | 0.000 | 0.198   | 0.024  |
| ENSG00000166268 | MYRFL          | 7.088 | 0.000 | 5.703   | 5.197 | 0.000 | 4.175   | 0.599  |
| ENSG00000215864 | NBPF7          | 7.080 | 0.000 | 6.280   | 5.110 | 0.000 | 4.543   | 0.620  |
| ENSG00000133985 | TTC9           | 7.048 | 0.000 | 5.054   | 4.992 | 0.000 | 3.493   | 0.625  |
| ENSG00000258791 | LINC00520      | 7.033 | 0.000 | 6.000   | 5.659 | 0.000 | 4.827   | 0.426  |
| ENSG00000130720 | FIBCD1         | 7.018 | 0.000 | 6.013   | 3.918 | 0.000 | 5.204   | 0.605  |
| ENSG00000251179 | RP11-893F2.9   | 7.015 | 0.000 | 1.960   | 5.040 | 0.000 | 1.398   | 0.166  |
| ENSG00000168955 | TM4SF20        | 6.973 | 0.000 | 30.792  | 1.959 | 0.096 | 16.179  | 2.940  |
| ENSG00000148346 | LCN2           | 6.971 | 0.000 | 181.042 | 3.808 | 0.000 | 173.808 | 14.408 |
| ENSG00000100003 | SEC14L2        | 6.837 | 0.000 | 2.375   | 4.544 | 0.000 | 1.547   | 0.296  |
| ENSG00000181634 | TNFSF15        | 6.832 | 0.000 | 4.966   | 5.300 | 0.000 | 3.853   | 0.407  |
| ENSG00000187288 | CIDEA          | 6.709 | 0.000 | 30.794  | 5.006 | 0.000 | 22.319  | 3.467  |
| ENSG00000226598 | AC017060.1     | 6.683 | 0.000 | 2.014   | 7.647 | 0.000 | 2.470   | 0.120  |
| ENSG00000099769 | IGFALS         | 6.682 | 0.000 | 2.317   | 4.470 | 0.000 | 1.485   | 0.122  |
| ENSG00000159261 | CLDN14         | 6.656 | 0.000 | 0.511   | 2.793 | 0.006 | 0.621   | 0.045  |
| ENSG00000096395 | MLN            | 6.636 | 0.000 | 1.256   | 6.256 | 0.000 | 2.094   | 0.040  |
| ENSG00000066405 | CLDN18         | 6.602 | 0.000 | 1.149   | 5.809 | 0.000 | 1.240   | 0.049  |
| ENSG00000110080 | ST3GAL4        | 6.547 | 0.000 | 24.920  | 5.795 | 0.000 | 22.031  | 1.926  |
| ENSG00000258919 | RP11-1029J19.4 | 6.539 | 0.000 | 2.644   | 5.383 | 0.000 | 2.192   | 0.233  |
| ENSG00000205177 | C11orf91       | 6.516 | 0.000 | 2.367   | 4.132 | 0.000 | 1.404   | 0.219  |
| ENSG00000101188 | NTSR1          | 6.506 | 0.000 | 0.252   | 4.268 | 0.000 | 0.256   | 0.017  |
| ENSG00000205754 | SLCO1B7        | 6.503 | 0.000 | 0.226   | 2.028 | 0.143 | 0.046   | 0.005  |
| ENSG00000171060 | C8orf74        | 6.474 | 0.000 | 0.100   | 3.818 | 0.001 | 0.055   | 0.002  |
| ENSG00000169213 | RAB3B          | 6.447 | 0.000 | 5.881   | 4.685 | 0.000 | 4.194   | 0.751  |
| ENSG00000162009 | SSTR5          | 6.432 | 0.000 | 1.186   | 3.861 | 0.000 | 1.117   | 0.064  |
| ENSG00000225328 | AC019100.3     | 6.415 | 0.000 | 1.137   | 5.546 | 0.000 | 1.012   | 0.049  |
| ENSG00000128965 | CHAC1          | 6.353 | 0.000 | 6.331   | 2.796 | 0.000 | 5.110   | 0.920  |
| ENSG00000233005 | AC067959.1     | 6.339 | 0.000 | 0.521   | 2.235 | 1.000 | 0.125   | 0.009  |
| ENSG00000164379 | FOXQ1          | 6.337 | 0.000 | 10.174  | 4.098 | 0.000 | 6.403   | 0.995  |
| ENSG00000196990 | FAM163B        | 6.305 | 0.000 | 1.277   | 2.368 | 0.061 | 0.302   | 0.024  |
| ENSG00000105219 | CNTD2          | 6.222 | 0.000 | 1.285   | 3.238 | 0.002 | 0.971   | 0.122  |
| ENSG00000176395 | CEACAM20       | 6.134 | 0.000 | 0.396   | 1.670 | 0.340 | 0.518   | 0.027  |
| ENSG00000257453 | RP11-290L1.3   | 6.084 | 0.000 | 24.822  | 4.316 | 0.000 | 17.047  | 3.238  |
| ENSG00000185567 | AHNAK2         | 6.055 | 0.000 | 2.378   | 4.203 | 0.000 | 1.635   | 0.321  |
| ENSG00000257514 | RP11-755O11.2  | 6.023 | 0.000 | 1.648   | 3.123 | 0.006 | 1.453   | 0.096  |
| ENSG00000087085 | ACHE           | 5.969 | 0.000 | 25.039  | 4.491 | 0.000 | 18.244  | 3.472  |
| ENSG00000231274 | SBK3           | 5.950 | 0.000 | 0.571   | 4.379 | 0.000 | 0.421   | 0.046  |
| ENSG00000167612 | ANKRD33        | 5.938 | 0.000 | 0.371   | 5.023 | 0.000 | 0.454   | 0.026  |
| ENSG00000115008 | IL1A           | 5.923 | 0.000 | 1.140   | 5.885 | 0.000 | 1.176   | 0.098  |
| ENSG00000169047 | IRS1           | 5.900 | 0.000 | 6.447   | 4.645 | 0.000 | 4.990   | 0.891  |
| ENSG00000125657 | TNFSF9         | 5.868 | 0.000 | 1.402   | 6.000 | 0.000 | 1.443   | 0.179  |
| ENSG00000196352 | CD55           | 5.858 | 0.000 | 122.624 | 3.625 | 0.000 | 72.350  | 16.017 |
| ENSG00000162591 | MEGF6          | 5.852 | 0.000 | 7.693   | 3.810 | 0.000 | 5.414   | 0.733  |
| ENSG00000040608 | RTN4R          | 5.837 | 0.000 | 3.133   | 4.009 | 0.000 | 2.071   | 0.485  |
| ENSG00000205502 | C2CD4B         | 5.807 | 0.000 | 1.852   | 4.595 | 0.000 | 1.424   | 0.211  |
| ENSG00000140279 | DUOX2          | 5.804 | 0.000 | 102.686 | 2.898 | 0.013 | 50.471  | 6.854  |
| ENSG00000228791 | THRB-AS1       | 5.762 | 0.000 | 0.844   | 6.130 | 0.000 | 0.945   | 0.057  |
| ENSG00000135046 | ANXA1          | 5.753 | 0.000 | 55.558  | 3.848 | 0.000 | 36.309  | 9.064  |

|                 |                |       |       |         |        |       |        |        |
|-----------------|----------------|-------|-------|---------|--------|-------|--------|--------|
| ENSG00000198535 | C2CD4A         | 5.723 | 0.000 | 1.235   | 4.569  | 0.000 | 0.980  | 0.134  |
| ENSG00000134824 | FADS2          | 5.685 | 0.000 | 5.290   | -1.188 | 0.771 | 0.878  | 0.618  |
| ENSG00000181409 | AATK           | 5.681 | 0.000 | 8.467   | 3.097  | 0.000 | 4.281  | 1.179  |
| ENSG00000175874 | CREG2          | 5.645 | 0.000 | 0.113   | 2.712  | 0.020 | 0.047  | 0.006  |
| ENSG00000155265 | GOLGA7B        | 5.608 | 0.000 | 4.610   | 2.670  | 0.000 | 2.088  | 0.712  |
| ENSG00000253405 | EVX1-AS        | 5.606 | 0.000 | 0.543   | 3.010  | 0.009 | 0.658  | 0.012  |
| ENSG00000168502 | SOGA2          | 5.593 | 0.000 | 2.145   | 4.996  | 0.000 | 1.919  | 0.319  |
| ENSG00000187583 | PLEKHN1        | 5.581 | 0.000 | 2.257   | 3.486  | 0.000 | 1.362  | 0.351  |
| ENSG00000134070 | IRAK2          | 5.568 | 0.000 | 6.515   | 4.486  | 0.000 | 5.161  | 1.022  |
| ENSG00000175946 | KLHL38         | 5.530 | 0.000 | 0.699   | 3.290  | 0.001 | 0.400  | 0.088  |
| ENSG00000253286 | CTD-2552K11.2  | 5.527 | 0.000 | 0.309   | 3.246  | 1.000 | 0.173  | 0.009  |
| ENSG00000159871 | LYPD5          | 5.526 | 0.000 | 2.221   | 3.270  | 0.000 | 1.228  | 0.283  |
| ENSG00000136872 | ALDOB          | 5.520 | 0.000 | 121.689 | 3.876  | 0.000 | 82.818 | 14.824 |
| ENSG00000255071 | SAA2-SAA4      | 5.516 | 0.000 | 1.451   | 2.265  | 0.080 | 1.421  | 0.057  |
| ENSG00000125207 | PIWIL1         | 5.507 | 0.000 | 1.369   | 3.364  | 0.003 | 1.777  | 0.040  |
| ENSG00000140254 | DUOXA1         | 5.467 | 0.000 | 13.390  | 2.439  | 0.046 | 6.262  | 0.365  |
| ENSG00000162699 | DNAJA1P5       | 5.455 | 0.000 | 0.342   | 4.802  | 1.000 | 0.325  | 0.000  |
| ENSG00000169247 | SH3TC2         | 5.376 | 0.000 | 0.643   | 3.983  | 0.000 | 0.467  | 0.091  |
| ENSG00000237988 | OR211P         | 5.375 | 0.000 | 4.591   | 1.451  | 0.487 | 0.848  | 0.510  |
| ENSG00000258404 | RP11-1029J19.5 | 5.371 | 0.000 | 1.506   | 4.306  | 0.000 | 1.210  | 0.115  |
| ENSG00000226715 | RP11-411H5.1   | 5.318 | 0.000 | 0.640   | 3.291  | 1.000 | 0.363  | 0.000  |
| ENSG00000100342 | APOL1          | 5.317 | 0.000 | 53.224  | 3.022  | 0.000 | 29.402 | 8.897  |
| ENSG00000234667 | ACTBP13        | 5.295 | 0.000 | 0.214   | 3.204  | 0.002 | 0.122  | 0.026  |
| ENSG00000203635 | AC144450.2     | 5.293 | 0.000 | 0.254   | 4.146  | 1.000 | 0.199  | 0.005  |
| ENSG00000169248 | CXCL11         | 5.293 | 0.000 | 5.633   | 2.981  | 0.006 | 1.198  | 0.213  |
| ENSG00000103888 | KIAA1199       | 5.286 | 0.000 | 4.504   | 2.786  | 0.001 | 3.270  | 0.660  |
| ENSG00000137860 | SLC28A2        | 5.261 | 0.000 | 11.562  | 4.334  | 0.000 | 9.539  | 1.323  |
| ENSG00000196228 | SULT1C3        | 5.260 | 0.000 | 2.188   | 3.131  | 0.007 | 2.528  | 0.060  |
| ENSG00000137203 | TFAP2A         | 5.260 | 0.000 | 0.748   | 4.495  | 0.000 | 1.011  | 0.098  |
| ENSG00000163739 | CXCL1          | 5.235 | 0.000 | 23.823  | 3.022  | 0.001 | 12.478 | 3.271  |
| ENSG00000124107 | SLPI           | 5.230 | 0.000 | 126.142 | 4.046  | 0.000 | 95.702 | 22.059 |
| ENSG00000181649 | PHLDA2         | 5.224 | 0.000 | 42.993  | 3.494  | 0.000 | 27.215 | 7.124  |
| ENSG00000146250 | PRSS35         | 5.154 | 0.000 | 0.351   | 4.606  | 0.000 | 0.317  | 0.042  |
| ENSG00000169908 | TM4SF1         | 5.153 | 0.000 | 70.359  | 3.273  | 0.000 | 42.731 | 12.197 |
| ENSG00000184106 | TREML3P        | 5.143 | 0.000 | 0.251   | 2.946  | 1.000 | 0.291  | 0.014  |
| ENSG00000163734 | CXCL3          | 5.090 | 0.000 | 9.366   | 3.076  | 0.000 | 5.266  | 1.435  |
| ENSG00000236039 | AC019117.2     | 5.056 | 0.000 | 3.317   | 5.395  | 0.000 | 3.831  | 0.390  |
| ENSG00000183914 | DNAH2          | 5.007 | 0.000 | 0.420   | 3.614  | 0.000 | 0.300  | 0.070  |
| ENSG00000138823 | MTTP           | 4.988 | 0.000 | 0.345   | 2.847  | 0.005 | 0.126  | 0.031  |
| ENSG00000185022 | MAFF           | 4.973 | 0.000 | 13.685  | 3.783  | 0.000 | 9.961  | 2.222  |
| ENSG00000168679 | SLC16A4        | 4.969 | 0.000 | 4.766   | 4.781  | 0.000 | 4.651  | 0.770  |
| ENSG00000176842 | IRX5           | 4.942 | 0.000 | 0.161   | 4.818  | 0.000 | 0.166  | 0.011  |
| ENSG00000151012 | SLC7A11        | 4.902 | 0.000 | 3.572   | 4.434  | 0.000 | 3.259  | 0.595  |
| ENSG00000146054 | TRIM7          | 4.882 | 0.000 | 3.450   | 3.033  | 0.000 | 2.064  | 0.649  |
| ENSG00000229715 | EEF1DP3        | 4.877 | 0.000 | 0.129   | 3.975  | 0.000 | 0.105  | 0.008  |
| ENSG00000100033 | PRODH          | 4.869 | 0.000 | 3.081   | 2.419  | 0.007 | 1.412  | 0.503  |
| ENSG00000136689 | IL1RN          | 4.859 | 0.000 | 11.939  | 4.271  | 0.000 | 10.721 | 1.698  |
| ENSG00000223392 | CLDN10-AS1     | 4.811 | 0.000 | 0.542   | 3.185  | 0.004 | 0.342  | 0.054  |
| ENSG00000133454 | MYO18B         | 4.792 | 0.000 | 0.123   | 2.802  | 0.007 | 0.065  | 0.016  |
| ENSG00000139289 | PHLDA1         | 4.771 | 0.000 | 11.220  | 3.611  | 0.000 | 8.294  | 2.058  |
| ENSG00000112494 | UNC93A         | 4.763 | 0.000 | 0.238   | 4.074  | 0.000 | 0.204  | 0.018  |
| ENSG00000183018 | SPNS2          | 4.763 | 0.000 | 49.739  | 2.203  | 0.002 | 36.592 | 9.478  |
| ENSG00000102934 | PLLP           | 4.756 | 0.000 | 27.919  | 3.875  | 0.000 | 22.240 | 5.132  |
| ENSG00000181577 | C6orf223       | 4.743 | 0.000 | 7.423   | 3.698  | 0.001 | 5.725  | 0.819  |
| ENSG00000092607 | TBX15          | 4.721 | 0.000 | 0.146   | 3.820  | 0.001 | 0.116  | 0.013  |
| ENSG00000158055 | GRHL3          | 4.714 | 0.000 | 0.621   | 3.792  | 0.000 | 0.491  | 0.105  |
| ENSG00000134317 | GRHL1          | 4.712 | 0.000 | 0.684   | 3.529  | 0.000 | 0.509  | 0.128  |
| ENSG00000224826 | AC019109.1     | 4.697 | 0.000 | 0.166   | 3.421  | 1.000 | 0.115  | 0.008  |
| ENSG00000107159 | CA9            | 4.668 | 0.000 | 3.265   | 3.636  | 0.000 | 2.594  | 0.538  |
| ENSG00000228353 | RP11-184A2.2   | 4.663 | 0.000 | 1.225   | 4.803  | 0.000 | 1.359  | 0.071  |
| ENSG00000253308 | RP1-170O19.17  | 4.635 | 0.000 | 0.333   | 2.493  | 1.000 | 0.515  | 0.000  |
| ENSG00000142627 | EPHA2          | 4.632 | 0.000 | 26.890  | 3.451  | 0.000 | 19.221 | 5.264  |
| ENSG00000166396 | SERPINB7       | 4.591 | 0.000 | 0.236   | 3.121  | 1.000 | 0.088  | 0.000  |
| ENSG00000125538 | IL1B           | 4.590 | 0.000 | 4.365   | 3.979  | 0.000 | 3.725  | 0.677  |
| ENSG00000110427 | KIAA1549L      | 4.588 | 0.000 | 0.659   | 3.088  | 0.006 | 0.672  | 0.073  |
| ENSG00000185761 | ADAMTSL5       | 4.579 | 0.000 | 3.967   | 3.632  | 0.000 | 3.091  | 0.809  |
| ENSG00000135919 | SERPINE2       | 4.560 | 0.000 | 12.068  | 2.992  | 0.000 | 7.548  | 2.340  |
| ENSG00000165388 | ZNF488         | 4.547 | 0.000 | 1.445   | 3.300  | 0.000 | 1.032  | 0.255  |
| ENSG00000153292 | GPR110         | 4.545 | 0.000 | 2.255   | 3.588  | 0.000 | 1.770  | 0.383  |
| ENSG00000142700 | DMRTA2         | 4.536 | 0.000 | 0.171   | 3.298  | 1.000 | 0.069  | 0.005  |
| ENSG00000187258 | NPSR1          | 4.529 | 0.000 | 1.087   | 4.885  | 0.000 | 0.251  | 0.018  |
| ENSG00000165606 | DRGX           | 4.527 | 0.000 | 0.722   | 1.926  | 0.171 | 0.546  | 0.090  |
| ENSG00000107618 | RBP3           | 4.518 | 0.000 | 0.124   | 1.688  | 1.000 | 0.027  | 0.005  |
| ENSG00000185940 | KRTAP5-5       | 4.482 | 0.000 | 1.063   | 3.243  | 0.000 | 0.740  | 0.165  |
| ENSG00000114771 | AADAC          | 4.458 | 0.000 | 1.887   | 2.547  | 0.010 | 1.006  | 0.314  |

|                 |               |       |       |         |       |       |         |         |
|-----------------|---------------|-------|-------|---------|-------|-------|---------|---------|
| ENSG00000106089 | STX1A         | 4.454 | 0.000 | 3.518   | 3.533 | 0.000 | 2.761   | 0.726   |
| ENSG00000171004 | HS6ST2        | 4.436 | 0.000 | 0.729   | 3.357 | 0.000 | 0.550   | 0.130   |
| ENSG00000228412 | RP4-625H18.2  | 4.411 | 0.000 | 0.765   | 2.969 | 0.004 | 0.491   | 0.106   |
| ENSG00000254693 | RP11-58K22.5  | 4.362 | 0.000 | 19.901  | 3.144 | 0.000 | 13.906  | 4.140   |
| ENSG00000170231 | FABP6         | 4.358 | 0.000 | 1.952   | 2.695 | 0.014 | 1.107   | 0.267   |
| ENSG00000139629 | GALNT6        | 4.351 | 0.000 | 14.894  | 3.552 | 0.000 | 12.097  | 3.184   |
| ENSG00000171017 | LRRC8E        | 4.348 | 0.000 | 2.474   | 3.293 | 0.000 | 1.841   | 0.532   |
| ENSG00000169583 | CLIC3         | 4.325 | 0.000 | 3.398   | 3.062 | 0.000 | 2.338   | 0.672   |
| ENSG00000128683 | GAD1          | 4.319 | 0.000 | 0.101   | 3.804 | 0.000 | 0.088   | 0.010   |
| ENSG00000249700 | SRD5A3-AS1    | 4.312 | 0.000 | 5.525   | 3.771 | 0.000 | 4.735   | 1.170   |
| ENSG00000088992 | TESC          | 4.306 | 0.000 | 4.440   | 3.754 | 0.000 | 3.886   | 0.919   |
| ENSG00000236081 | AC074389.9    | 4.284 | 0.000 | 1.082   | 2.765 | 0.003 | 0.668   | 0.191   |
| ENSG00000075618 | FSCN1         | 4.281 | 0.000 | 11.313  | 2.258 | 0.000 | 5.833   | 2.511   |
| ENSG00000006327 | TNFRSF12A     | 4.275 | 0.000 | 23.661  | 2.925 | 0.000 | 15.073  | 4.491   |
| ENSG00000137033 | IL33          | 4.273 | 0.000 | 8.271   | 3.550 | 0.000 | 6.738   | 1.635   |
| ENSG00000130751 | NPAS1         | 4.270 | 0.000 | 0.965   | 2.626 | 0.000 | 0.571   | 0.200   |
| ENSG00000023171 | GRAMD1B       | 4.266 | 0.000 | 1.845   | 2.530 | 0.000 | 2.229   | 0.410   |
| ENSG00000115009 | CCL20         | 4.239 | 0.000 | 28.609  | 2.992 | 0.001 | 18.859  | 4.960   |
| ENSG00000128039 | SRD5A3        | 4.237 | 0.000 | 12.890  | 3.848 | 0.000 | 11.481  | 2.863   |
| ENSG00000204052 | LRRC73        | 4.211 | 0.000 | 0.281   | 3.302 | 0.000 | 0.213   | 0.045   |
| ENSG00000092929 | UNC13D        | 4.210 | 0.000 | 33.516  | 2.719 | 0.000 | 20.940  | 7.696   |
| ENSG00000173156 | RHOD          | 4.204 | 0.000 | 25.469  | 2.660 | 0.000 | 15.257  | 5.416   |
| ENSG00000258689 | RP6-65G23.1   | 4.201 | 0.000 | 0.733   | 4.621 | 0.000 | 0.868   | 0.071   |
| ENSG00000214248 | AC010336.1    | 4.201 | 0.000 | 1.763   | 3.172 | 0.000 | 1.309   | 0.398   |
| ENSG00000138759 | FRAS1         | 4.189 | 0.000 | 0.459   | 3.456 | 0.000 | 0.372   | 0.094   |
| ENSG00000176485 | PLA2G16       | 4.177 | 0.000 | 8.876   | 2.972 | 0.000 | 6.105   | 1.948   |
| ENSG00000198788 | MUC2          | 4.172 | 0.000 | 980.532 | 3.530 | 0.000 | 824.617 | 207.988 |
| ENSG00000116741 | RGS2          | 4.145 | 0.000 | 39.110  | 2.604 | 0.000 | 23.270  | 8.671   |
| ENSG00000237686 | RP5-1120P11.1 | 4.137 | 0.000 | 1.260   | 3.076 | 0.004 | 0.909   | 0.196   |
| ENSG00000173227 | SYT12         | 4.134 | 0.000 | 0.574   | 2.076 | 0.111 | 0.496   | 0.085   |
| ENSG00000110244 | APOA4         | 4.116 | 0.000 | 0.571   | 1.581 | 0.398 | 0.134   | 0.044   |
| ENSG00000109321 | AREG          | 4.115 | 0.000 | 0.665   | 2.404 | 0.031 | 0.341   | 0.100   |
| ENSG00000233529 | HCG21         | 4.112 | 0.000 | 0.600   | 3.261 | 1.000 | 0.473   | 0.037   |
| ENSG00000235563 | RP11-334A14.8 | 4.085 | 0.000 | 0.252   | 3.178 | 0.005 | 0.373   | 0.026   |
| ENSG00000250033 | SLC7A11-AS1   | 4.069 | 0.000 | 0.310   | 3.134 | 0.005 | 0.234   | 0.043   |
| ENSG00000259485 | CTD-2147F2.1  | 4.068 | 0.000 | 0.900   | 1.333 | 0.645 | 0.167   | 0.095   |
| ENSG00000186493 | C5orf38       | 4.059 | 0.000 | 0.537   | 2.258 | 0.081 | 0.256   | 0.055   |
| ENSG00000175832 | ETV4          | 4.055 | 0.000 | 6.883   | 2.580 | 0.001 | 4.209   | 1.492   |
| ENSG00000233559 | AC016831.7    | 4.052 | 0.000 | 1.511   | 3.464 | 0.000 | 1.269   | 0.299   |
| ENSG00000228613 | AC144450.1    | 4.049 | 0.000 | 0.320   | 3.140 | 1.000 | 0.241   | 0.000   |
| ENSG00000100196 | KDELR3        | 4.032 | 0.000 | 46.652  | 3.270 | 0.000 | 37.340  | 10.874  |
| ENSG00000142698 | C1orf94       | 4.007 | 0.000 | 0.270   | 2.452 | 0.043 | 0.155   | 0.037   |
| ENSG00000158786 | PLA2G2F       | 4.006 | 0.000 | 0.366   | 2.335 | 0.034 | 0.914   | 0.066   |
| ENSG00000107807 | TLX1          | 3.992 | 0.000 | 0.913   | 4.142 | 0.000 | 1.015   | 0.165   |
| ENSG00000087510 | TFAP2C        | 3.975 | 0.000 | 0.638   | 3.085 | 0.000 | 0.492   | 0.143   |
| ENSG00000132357 | CARD6         | 3.973 | 0.000 | 4.158   | 2.911 | 0.000 | 3.017   | 0.951   |
| ENSG00000177822 | AC108142.1    | 3.954 | 0.000 | 0.074   | 1.567 | 1.000 | 0.021   | 0.009   |
| ENSG00000116260 | QSOX1         | 3.952 | 0.000 | 95.893  | 3.200 | 0.000 | 76.315  | 23.816  |
| ENSG00000013588 | GPRC5A        | 3.925 | 0.000 | 134.945 | 3.309 | 0.000 | 110.548 | 32.728  |
| ENSG00000106038 | EVX1          | 3.923 | 0.000 | 0.661   | 3.172 | 0.006 | 0.698   | 0.020   |
| ENSG00000086159 | AQP6          | 3.917 | 0.000 | 0.079   | 1.987 | 0.139 | 0.035   | 0.012   |
| ENSG00000170561 | IRX2          | 3.915 | 0.000 | 1.370   | 2.111 | 0.122 | 0.561   | 0.106   |
| ENSG00000085117 | CD82          | 3.908 | 0.000 | 28.446  | 2.787 | 0.000 | 19.672  | 6.948   |
| ENSG00000112541 | PDE10A        | 3.906 | 0.000 | 0.556   | 2.324 | 0.011 | 0.314   | 0.117   |
| ENSG00000086548 | CEACAM6       | 3.899 | 0.000 | 774.917 | 3.077 | 0.000 | 598.931 | 180.414 |
| ENSG00000164761 | TNFRSF11B     | 3.892 | 0.000 | 8.007   | 2.792 | 0.000 | 5.611   | 1.823   |
| ENSG00000160862 | AZGP1         | 3.890 | 0.000 | 17.599  | 3.200 | 0.000 | 14.295  | 4.148   |
| ENSG00000241322 | CDRT1         | 3.883 | 0.000 | 0.301   | 3.547 | 0.000 | 0.275   | 0.058   |
| ENSG00000072422 | RHOBTB1       | 3.872 | 0.000 | 7.568   | 3.401 | 0.000 | 6.594   | 1.826   |
| ENSG00000154928 | EPHB1         | 3.867 | 0.000 | 0.490   | 1.422 | 0.494 | 0.434   | 0.058   |
| ENSG00000134504 | KCTD1         | 3.849 | 0.000 | 4.832   | 2.769 | 0.000 | 3.398   | 1.240   |
| ENSG00000187664 | HAPLN4        | 3.844 | 0.000 | 1.794   | 2.342 | 0.004 | 1.029   | 0.408   |
| ENSG00000185860 | C1orf110      | 3.835 | 0.000 | 0.048   | 3.224 | 1.000 | 0.040   | 0.000   |
| ENSG00000102265 | TIMP1         | 3.833 | 0.000 | 94.987  | 3.164 | 0.000 | 76.702  | 23.570  |
| ENSG00000204540 | PSORS1C1      | 3.828 | 0.000 | 4.790   | 2.619 | 0.000 | 3.174   | 1.191   |
| ENSG00000259520 | CTD-2651B20.3 | 3.823 | 0.000 | 2.010   | 3.161 | 0.000 | 1.672   | 0.427   |
| ENSG00000081138 | CDH7          | 3.822 | 0.000 | 0.022   | 5.867 | 1.000 | 0.040   | 0.000   |
| ENSG00000226740 | RP11-31L23.3  | 3.810 | 0.000 | 0.540   | 3.108 | 0.004 | 0.445   | 0.082   |
| ENSG00000115155 | OTOF          | 3.781 | 0.000 | 0.056   | 1.997 | 0.131 | 0.025   | 0.009   |
| ENSG00000088826 | SMOX          | 3.773 | 0.000 | 5.300   | 3.426 | 0.000 | 4.759   | 1.276   |
| ENSG00000164520 | RAET1E        | 3.764 | 0.000 | 0.356   | 3.298 | 0.001 | 0.309   | 0.062   |
| ENSG00000100078 | PLA2G3        | 3.757 | 0.000 | 1.903   | 2.368 | 0.061 | 1.014   | 0.165   |
| ENSG00000214226 | C17orf67      | 3.751 | 0.000 | 3.893   | 2.756 | 0.000 | 2.774   | 0.958   |
| ENSG00000007174 | DNAH9         | 3.734 | 0.000 | 0.069   | 3.744 | 0.000 | 0.070   | 0.013   |
| ENSG00000138347 | MYPN          | 3.733 | 0.000 | 1.459   | 2.740 | 0.000 | 1.024   | 0.338   |

|                 |               |       |       |        |       |       |        |        |
|-----------------|---------------|-------|-------|--------|-------|-------|--------|--------|
| ENSG00000213145 | CRIP1         | 3.723 | 0.000 | 29.489 | 2.802 | 0.000 | 20.877 | 7.002  |
| ENSG00000160183 | TMPRSS3       | 3.718 | 0.000 | 2.092  | 3.555 | 0.000 | 1.998  | 0.527  |
| ENSG00000162747 | FCGR3B        | 3.704 | 0.000 | 0.621  | 1.706 | 0.306 | 0.215  | 0.089  |
| ENSG00000138772 | ANXA3         | 3.695 | 0.000 | 25.791 | 2.890 | 0.000 | 19.824 | 6.679  |
| ENSG00000185087 | FAM169B       | 3.693 | 0.000 | 0.075  | 3.103 | 1.000 | 0.063  | 0.005  |
| ENSG00000136574 | GATA4         | 3.689 | 0.000 | 0.473  | 3.321 | 0.004 | 0.337  | 0.013  |
| ENSG00000152669 | CCNO          | 3.677 | 0.000 | 3.797  | 3.022 | 0.000 | 3.166  | 0.870  |
| ENSG00000256894 | RP11-283G6.3  | 3.676 | 0.000 | 2.688  | 3.411 | 0.000 | 2.525  | 0.600  |
| ENSG00000132911 | NMUR2         | 3.674 | 0.000 | 1.258  | 2.239 | 0.061 | 1.374  | 0.012  |
| ENSG00000161647 | MPP3          | 3.671 | 0.000 | 1.543  | 3.079 | 0.000 | 1.273  | 0.402  |
| ENSG00000110492 | MDK           | 3.668 | 0.000 | 47.505 | 2.946 | 0.000 | 37.325 | 12.052 |
| ENSG00000205517 | RGL3          | 3.666 | 0.000 | 8.685  | 2.951 | 0.000 | 6.748  | 2.171  |
| ENSG00000179799 | OR7E22P       | 3.663 | 0.000 | 0.583  | 2.010 | 0.146 | 0.268  | 0.084  |
| ENSG00000213822 | CEACAM18      | 3.644 | 0.000 | 1.669  | 2.205 | 0.079 | 0.789  | 0.081  |
| ENSG00000169403 | PTAFR         | 3.644 | 0.000 | 10.165 | 2.346 | 0.000 | 6.439  | 2.743  |
| ENSG00000101255 | TRIB3         | 3.642 | 0.000 | 4.965  | 2.560 | 0.000 | 3.345  | 1.271  |
| ENSG00000255202 | RP4-541C22.5  | 3.637 | 0.000 | 0.651  | 3.506 | 0.002 | 0.691  | 0.073  |
| ENSG00000148926 | ADM           | 3.623 | 0.000 | 21.355 | 2.501 | 0.000 | 14.103 | 5.447  |
| ENSG00000123843 | C4BPB         | 3.615 | 0.000 | 8.220  | 2.597 | 0.001 | 5.746  | 1.937  |
| ENSG00000164867 | NOS3          | 3.604 | 0.000 | 2.046  | 2.482 | 0.000 | 1.378  | 0.531  |
| ENSG00000188487 | INSC          | 3.592 | 0.000 | 4.299  | 2.650 | 0.000 | 3.100  | 1.150  |
| ENSG00000168785 | TSPAN5        | 3.582 | 0.000 | 2.327  | 2.908 | 0.000 | 1.872  | 0.639  |
| ENSG00000125780 | TGM3          | 3.577 | 0.000 | 0.707  | 2.730 | 0.001 | 0.528  | 0.162  |
| ENSG00000242407 | CTD-2377D24.4 | 3.577 | 0.001 | 0.619  | 6.355 | 0.000 | 2.176  | 0.000  |
| ENSG00000183778 | B3GALT5       | 3.577 | 0.000 | 25.124 | 3.195 | 0.000 | 22.766 | 5.869  |
| ENSG00000173898 | SPTBN2        | 3.571 | 0.000 | 2.001  | 2.904 | 0.000 | 1.611  | 0.510  |
| ENSG00000204539 | CDSN          | 3.560 | 0.000 | 3.743  | 3.861 | 0.000 | 4.232  | 0.756  |
| ENSG00000239948 | RN7SL368P     | 3.555 | 0.000 | 1.941  | 2.703 | 0.006 | 1.408  | 0.388  |
| ENSG00000152784 | PRDM8         | 3.551 | 0.000 | 1.810  | 2.367 | 0.000 | 1.164  | 0.479  |
| ENSG00000128203 | ASPHD2        | 3.550 | 0.000 | 5.676  | 3.072 | 0.000 | 4.799  | 1.560  |
| ENSG00000130164 | LDLR          | 3.541 | 0.000 | 28.594 | 2.581 | 0.000 | 20.097 | 7.297  |
| ENSG00000021488 | SLC7A9        | 3.537 | 0.000 | 2.197  | 1.996 | 0.133 | 1.753  | 0.414  |
| ENSG00000240541 | TM4SF1-AS1    | 3.535 | 0.000 | 1.147  | 2.362 | 0.013 | 0.730  | 0.271  |
| ENSG00000163286 | ALPPL2        | 3.531 | 0.000 | 1.301  | 2.704 | 0.002 | 0.980  | 0.303  |
| ENSG00000182747 | SLC35D3       | 3.511 | 0.000 | 0.375  | 2.392 | 0.031 | 0.237  | 0.073  |
| ENSG00000160408 | ST6GALNAC6    | 3.505 | 0.000 | 79.623 | 3.548 | 0.000 | 79.790 | 20.785 |
| ENSG00000147041 | SYTL5         | 3.480 | 0.000 | 15.882 | 2.766 | 0.000 | 12.409 | 4.350  |
| ENSG00000248514 | CTC-338M12.1  | 3.479 | 0.001 | 0.478  | 3.360 | 1.000 | 0.473  | 0.049  |
| ENSG00000229950 | TFAP2A-AS1    | 3.474 | 0.000 | 0.406  | 3.200 | 0.002 | 0.380  | 0.070  |
| ENSG00000166670 | MMP10         | 3.468 | 0.000 | 2.035  | 1.515 | 0.443 | 0.645  | 1.414  |
| ENSG00000172602 | RND1          | 3.467 | 0.000 | 4.618  | 2.912 | 0.000 | 3.712  | 1.147  |
| ENSG00000187642 | C1orf170      | 3.467 | 0.000 | 0.582  | 2.467 | 0.006 | 0.397  | 0.139  |
| ENSG00000251131 | CTD-2035E11.3 | 3.466 | 0.000 | 0.863  | 1.962 | 0.101 | 0.454  | 0.197  |
| ENSG00000123095 | BHLHE41       | 3.438 | 0.000 | 18.483 | 2.840 | 0.000 | 15.099 | 5.218  |
| ENSG00000213886 | UBD           | 3.437 | 0.000 | 26.402 | 1.177 | 0.792 | 6.502  | 5.379  |
| ENSG00000237643 | RP11-462G2.1  | 3.436 | 0.000 | 3.762  | 2.600 | 0.016 | 2.645  | 0.718  |
| ENSG00000144035 | NAT8          | 3.431 | 0.000 | 6.115  | 2.112 | 0.100 | 3.345  | 1.098  |
| ENSG00000109158 | GABRA4        | 3.431 | 0.000 | 0.051  | 3.211 | 0.001 | 0.048  | 0.011  |
| ENSG00000177238 | TRIM72        | 3.424 | 0.001 | 0.432  | 2.811 | 0.013 | 0.427  | 0.008  |
| ENSG00000171346 | KRT15         | 3.423 | 0.000 | 3.356  | 2.952 | 0.000 | 2.875  | 0.870  |
| ENSG00000125744 | RTN2          | 3.416 | 0.000 | 5.398  | 2.837 | 0.000 | 4.353  | 1.507  |
| ENSG00000250900 | CTC-338M12.6  | 3.414 | 0.000 | 1.425  | 2.263 | 0.012 | 0.909  | 0.368  |
| ENSG00000185332 | TMEM105       | 3.410 | 0.000 | 0.211  | 2.818 | 0.002 | 0.173  | 0.048  |
| ENSG00000219891 | ZSCAN12P1     | 3.408 | 0.000 | 2.489  | 2.847 | 0.000 | 2.049  | 0.650  |
| ENSG00000227205 | PFN1P9        | 3.405 | 0.001 | 0.748  | 2.095 | 1.000 | 0.419  | 0.111  |
| ENSG00000257766 | RP11-341G23.3 | 3.402 | 0.000 | 2.880  | 2.593 | 0.007 | 2.178  | 0.682  |
| ENSG00000004848 | ARX           | 3.400 | 0.000 | 0.833  | 3.779 | 0.000 | 0.941  | 0.202  |
| ENSG00000203799 | CCDC162P      | 3.382 | 0.000 | 8.246  | 3.710 | 0.000 | 9.078  | 2.303  |
| ENSG00000163395 | IGFN1         | 3.368 | 0.000 | 0.189  | 1.972 | 0.053 | 0.102  | 0.047  |
| ENSG00000142677 | IL22RA1       | 3.355 | 0.000 | 45.655 | 2.702 | 0.000 | 35.662 | 13.356 |
| ENSG00000136002 | ARHGEF4       | 3.354 | 0.000 | 0.270  | 2.994 | 0.000 | 0.248  | 0.066  |
| ENSG00000123838 | C4BPA         | 3.347 | 0.000 | 4.706  | 1.475 | 0.379 | 4.438  | 1.170  |
| ENSG00000254560 | RP11-1L12.3   | 3.341 | 0.001 | 1.161  | 2.531 | 0.031 | 0.831  | 0.117  |
| ENSG00000106258 | CYP3A5        | 3.314 | 0.000 | 54.103 | 2.636 | 0.000 | 42.593 | 15.976 |
| ENSG00000151364 | KCTD14        | 3.306 | 0.000 | 17.407 | 3.273 | 0.000 | 17.077 | 5.149  |
| ENSG00000168032 | ENTPD3        | 3.296 | 0.000 | 2.189  | 2.650 | 0.002 | 1.763  | 0.557  |
| ENSG00000226872 | AC002472.11   | 3.294 | 0.000 | 0.922  | 2.650 | 0.004 | 0.738  | 0.222  |
| ENSG00000163464 | CXCR1         | 3.281 | 0.001 | 0.277  | 1.506 | 0.467 | 0.091  | 0.048  |
| ENSG00000196754 | S100A2        | 3.269 | 0.000 | 1.061  | 2.479 | 0.002 | 0.778  | 0.282  |
| ENSG00000089723 | OTUB2         | 3.269 | 0.000 | 2.111  | 3.172 | 0.000 | 2.037  | 0.618  |
| ENSG00000188263 | IL17REL       | 3.264 | 0.000 | 1.018  | 1.725 | 0.260 | 0.466  | 0.229  |
| ENSG00000124920 | MYRF          | 3.261 | 0.000 | 12.677 | 2.533 | 0.000 | 9.737  | 3.729  |
| ENSG00000171234 | UGT2B7        | 3.254 | 0.000 | 5.688  | 1.535 | 0.250 | 4.880  | 1.538  |
| ENSG00000251537 | RP11-385D13.1 | 3.236 | 0.000 | 2.902  | 2.652 | 0.000 | 2.347  | 0.875  |
| ENSG00000116132 | PRRX1         | 3.236 | 0.000 | 0.525  | 2.469 | 0.003 | 0.392  | 0.140  |

|                 |               |       |       |        |       |       |        |        |
|-----------------|---------------|-------|-------|--------|-------|-------|--------|--------|
| ENSG00000100453 | GZMB          | 3.234 | 0.000 | 1.965  | 1.472 | 0.308 | 0.801  | 0.544  |
| ENSG00000254829 | RP11-7115.3   | 3.221 | 0.000 | 25.597 | 3.078 | 0.000 | 24.164 | 7.686  |
| ENSG00000165507 | C10orf10      | 3.220 | 0.000 | 9.700  | 2.736 | 0.000 | 8.142  | 2.967  |
| ENSG00000183628 | DGCR6         | 3.204 | 0.000 | 1.499  | 1.998 | 0.026 | 0.883  | 0.418  |
| ENSG00000163874 | ZC3H12A       | 3.204 | 0.000 | 18.788 | 2.014 | 0.001 | 11.316 | 5.686  |
| ENSG00000090402 | SI            | 3.201 | 0.000 | 47.660 | 3.149 | 0.000 | 47.871 | 13.029 |
| ENSG00000094755 | GABRP         | 3.200 | 0.000 | 0.619  | 2.058 | 0.044 | 0.380  | 0.163  |
| ENSG00000186451 | SPATA12       | 3.196 | 0.001 | 0.158  | 2.992 | 0.006 | 0.149  | 0.026  |
| ENSG00000225506 | CYP4A22-AS1   | 3.195 | 0.002 | 0.321  | 2.098 | 1.000 | 0.182  | 0.046  |
| ENSG00000230266 | XXYLT1-AS2    | 3.195 | 0.000 | 0.853  | 2.103 | 0.061 | 0.532  | 0.215  |
| ENSG00000204634 | TBC1D8        | 3.172 | 0.000 | 9.492  | 2.980 | 0.000 | 8.921  | 2.922  |
| ENSG00000259479 | CTD-2008A1.2  | 3.171 | 0.000 | 0.925  | 2.565 | 0.001 | 0.744  | 0.259  |
| ENSG00000146678 | IGFBP1        | 3.169 | 0.002 | 0.251  | 1.066 | 1.000 | 0.053  | 0.047  |
| ENSG00000146049 | KAAG1         | 3.166 | 0.000 | 0.424  | 1.844 | 0.190 | 0.226  | 0.100  |
| ENSG00000164542 | KIAA0895      | 3.166 | 0.000 | 1.791  | 2.268 | 0.002 | 1.259  | 0.525  |
| ENSG00000148965 | SAA4          | 3.155 | 0.002 | 0.330  | 1.232 | 1.000 | 0.440  | 0.031  |
| ENSG00000165188 | RNF183        | 3.152 | 0.000 | 1.239  | 2.813 | 0.002 | 1.126  | 0.319  |
| ENSG00000136155 | SEEL          | 3.148 | 0.000 | 2.246  | 3.143 | 0.000 | 2.286  | 0.575  |
| ENSG00000109610 | SOD3          | 3.145 | 0.000 | 28.662 | 2.559 | 0.000 | 22.940 | 8.624  |
| ENSG00000183298 | RP11-556K13.1 | 3.141 | 0.000 | 0.617  | 2.279 | 0.020 | 0.431  | 0.157  |
| ENSG00000165816 | VWA2          | 3.140 | 0.000 | 2.501  | 2.353 | 0.017 | 1.847  | 0.645  |
| ENSG00000249743 | RP11-60A8.1   | 3.132 | 0.003 | 0.146  | 2.430 | 1.000 | 0.107  | 0.010  |
| ENSG00000100373 | UPK3A         | 3.130 | 0.000 | 0.607  | 2.354 | 0.025 | 0.443  | 0.154  |
| ENSG00000147689 | FAM83A        | 3.127 | 0.000 | 0.256  | 3.752 | 0.000 | 0.336  | 0.064  |
| ENSG00000225315 | RP11-293P20.2 | 3.124 | 0.000 | 2.430  | 2.452 | 0.004 | 1.876  | 0.673  |
| ENSG00000128578 | STRIP2        | 3.124 | 0.000 | 2.244  | 2.631 | 0.005 | 1.897  | 0.596  |
| ENSG00000238271 | IFNWP19       | 3.116 | 0.002 | 0.679  | 2.443 | 1.000 | 0.507  | 0.014  |
| ENSG00000137267 | TUBB2A        | 3.116 | 0.000 | 13.548 | 2.654 | 0.000 | 11.235 | 4.074  |
| ENSG00000065833 | ME1           | 3.116 | 0.000 | 31.313 | 2.766 | 0.000 | 27.541 | 9.154  |
| ENSG00000233441 | CYP2AB1P      | 3.110 | 0.003 | 0.210  | 3.150 | 1.000 | 0.469  | 0.013  |
| ENSG00000185739 | SRL           | 3.110 | 0.000 | 0.262  | 2.760 | 0.003 | 0.237  | 0.070  |
| ENSG00000109101 | FOXN1         | 3.109 | 0.002 | 0.083  | 3.709 | 0.001 | 0.107  | 0.010  |
| ENSG00000253227 | RP11-383J24.1 | 3.105 | 0.002 | 1.066  | 3.404 | 0.002 | 1.250  | 0.185  |
| ENSG00000259187 | CTD-2008A1.1  | 3.097 | 0.003 | 0.458  | 2.858 | 1.000 | 0.433  | 0.037  |
| ENSG00000183248 | CTD-3193O13.9 | 3.093 | 0.000 | 0.169  | 3.671 | 0.000 | 0.204  | 0.040  |
| ENSG00000228146 | CASP16        | 3.085 | 0.000 | 4.239  | 2.336 | 0.004 | 3.141  | 1.229  |
| ENSG00000101144 | BMP7          | 3.082 | 0.000 | 1.712  | 2.432 | 0.000 | 1.314  | 0.525  |
| ENSG00000113302 | IL12B         | 3.079 | 0.003 | 0.132  | 1.287 | 1.000 | 0.036  | 0.020  |
| ENSG00000058085 | LAMC2         | 3.077 | 0.000 | 47.306 | 2.455 | 0.000 | 36.933 | 14.467 |
| ENSG00000175505 | CLCF1         | 3.074 | 0.000 | 4.961  | 1.965 | 0.000 | 3.060  | 1.601  |
| ENSG00000189377 | CXCL17        | 3.073 | 0.003 | 0.312  | 2.376 | 1.000 | 0.231  | 0.035  |
| ENSG00000178531 | CTXN1         | 3.071 | 0.000 | 0.656  | 2.292 | 0.024 | 0.477  | 0.176  |
| ENSG00000251026 | RP11-138J23.1 | 3.070 | 0.002 | 0.252  | 1.540 | 1.000 | 0.079  | 0.014  |
| ENSG00000204876 | ACO21218.2    | 3.059 | 0.003 | 11.169 | 2.803 | 0.017 | 10.828 | 2.021  |
| ENSG00000185988 | PLK5          | 3.057 | 0.003 | 0.131  | 1.498 | 1.000 | 0.050  | 0.024  |
| ENSG00000233098 | RP11-344E13.3 | 3.055 | 0.000 | 0.091  | 2.594 | 0.011 | 0.074  | 0.019  |
| ENSG00000140859 | KIFC3         | 3.046 | 0.000 | 3.921  | 2.576 | 0.000 | 3.289  | 1.256  |
| ENSG00000197930 | ERO1L         | 3.040 | 0.000 | 40.764 | 2.620 | 0.000 | 34.639 | 12.972 |
| ENSG00000128242 | GAL3ST1       | 3.039 | 0.000 | 3.088  | 2.820 | 0.000 | 2.849  | 0.936  |
| ENSG00000135702 | CHST5         | 3.032 | 0.000 | 29.144 | 2.852 | 0.000 | 26.951 | 8.986  |
| ENSG00000112414 | GPR126        | 3.028 | 0.000 | 13.749 | 2.590 | 0.000 | 11.798 | 4.152  |
| ENSG00000029153 | ARNTL2        | 3.023 | 0.000 | 3.512  | 2.431 | 0.001 | 2.808  | 1.073  |
| ENSG00000165810 | BTNL9         | 3.023 | 0.000 | 3.039  | 2.985 | 0.000 | 3.081  | 0.941  |
| ENSG00000074211 | PPP2R2C       | 3.021 | 0.002 | 0.087  | 1.634 | 0.342 | 0.040  | 0.020  |
| ENSG00000169429 | IL8           | 3.020 | 0.002 | 1.817  | 1.708 | 0.293 | 1.901  | 0.389  |
| ENSG00000226652 | PSMD10P2      | 3.016 | 0.000 | 2.109  | 2.444 | 0.005 | 1.694  | 0.618  |
| ENSG00000235385 | GS1-600G8.5   | 3.015 | 0.003 | 0.421  | 2.638 | 0.027 | 0.378  | 0.079  |
| ENSG00000255007 | CTD-2589M5.4  | 3.013 | 0.000 | 1.340  | 2.467 | 0.007 | 1.082  | 0.375  |
| ENSG00000258757 | RP11-841O20.2 | 3.012 | 0.000 | 61.227 | 2.386 | 0.000 | 47.585 | 19.722 |
| ENSG00000149043 | SYT8          | 3.008 | 0.000 | 0.811  | 2.640 | 0.000 | 0.700  | 0.245  |
| ENSG00000206145 | P2RX6P        | 3.002 | 0.003 | 0.306  | 2.740 | 1.000 | 0.304  | 0.000  |
| ENSG00000169258 | GPRIN1        | 2.998 | 0.000 | 9.093  | 3.093 | 0.000 | 9.459  | 2.775  |
| ENSG00000133321 | RARRES3       | 2.995 | 0.000 | 35.169 | 2.245 | 0.004 | 25.368 | 10.577 |
| ENSG00000152128 | TMEM163       | 2.993 | 0.000 | 0.456  | 2.047 | 0.065 | 0.289  | 0.124  |
| ENSG00000233718 | MYCNOS        | 2.992 | 0.001 | 0.183  | 2.537 | 0.018 | 0.156  | 0.044  |
| ENSG00000137225 | CAPN11        | 2.989 | 0.000 | 2.203  | 2.519 | 0.012 | 1.862  | 0.594  |
| ENSG00000179862 | CITED4        | 2.985 | 0.000 | 1.852  | 1.748 | 0.094 | 0.999  | 0.551  |
| ENSG00000118898 | PPL           | 2.983 | 0.000 | 6.077  | 2.344 | 0.000 | 4.686  | 2.031  |
| ENSG00000236751 | RP1-30G7.2    | 2.981 | 0.001 | 0.750  | 2.565 | 0.015 | 0.630  | 0.183  |
| ENSG00000111701 | APOBEC1       | 2.976 | 0.000 | 21.769 | 2.323 | 0.001 | 16.858 | 6.899  |
| ENSG00000203472 | RP11-77K12.4  | 2.973 | 0.000 | 2.797  | 2.490 | 0.000 | 2.296  | 0.866  |
| ENSG00000167588 | GPD1          | 2.967 | 0.000 | 4.570  | 3.184 | 0.000 | 5.076  | 1.408  |
| ENSG00000173557 | C2orf70       | 2.967 | 0.000 | 0.813  | 1.985 | 0.049 | 0.512  | 0.236  |
| ENSG00000221926 | TRIM16        | 2.951 | 0.000 | 7.346  | 2.340 | 0.000 | 5.725  | 2.491  |
| ENSG00000188037 | CLCN1         | 2.945 | 0.001 | 0.114  | 1.977 | 0.130 | 0.071  | 0.027  |

|                 |               |       |       |         |        |       |         |         |
|-----------------|---------------|-------|-------|---------|--------|-------|---------|---------|
| ENSG00000255813 | AL162497.1    | 2.942 | 0.000 | 23.843  | 2.523  | 0.000 | 20.446  | 7.696   |
| ENSG00000189058 | APOD          | 2.941 | 0.000 | 7.080   | 1.487  | 0.381 | 3.656   | 1.346   |
| ENSG00000256050 | RP11-982M15.6 | 2.939 | 0.000 | 1.209   | 2.671  | 0.001 | 1.091   | 0.373   |
| ENSG00000158023 | WDR66         | 2.937 | 0.000 | 0.182   | 2.412  | 0.005 | 0.146   | 0.055   |
| ENSG00000182378 | PLCXD1        | 2.934 | 0.000 | 0.913   | 1.712  | 0.105 | 0.502   | 0.284   |
| ENSG00000136542 | GALNT5        | 2.926 | 0.000 | 22.415  | 2.620  | 0.000 | 19.916  | 7.225   |
| ENSG00000183196 | CHST6         | 2.925 | 0.000 | 1.916   | 2.590  | 0.000 | 1.680   | 0.616   |
| ENSG00000230107 | CTA-126B4.7   | 2.916 | 0.002 | 1.119   | 1.344  | 0.615 | 0.928   | 0.296   |
| ENSG00000235523 | RP11-63P12.7  | 2.911 | 0.000 | 7.664   | 2.300  | 0.006 | 5.749   | 2.306   |
| ENSG00000185950 | IRS2          | 2.904 | 0.000 | 12.689  | 2.387  | 0.000 | 10.414  | 4.237   |
| ENSG00000171889 | MIR31HG       | 2.901 | 0.005 | 0.680   | 2.392  | 1.000 | 0.341   | 0.021   |
| ENSG00000182240 | BACE2         | 2.901 | 0.000 | 54.972  | 2.478  | 0.000 | 46.224  | 18.385  |
| ENSG00000184995 | IFNE          | 2.900 | 0.004 | 0.190   | 2.486  | 1.000 | 0.161   | 0.005   |
| ENSG00000162078 | ZG16B         | 2.898 | 0.000 | 59.062  | 2.794  | 0.000 | 55.966  | 19.297  |
| ENSG00000241544 | RP11-6F2.5    | 2.896 | 0.001 | 0.252   | 1.817  | 0.179 | 0.145   | 0.064   |
| ENSG00000179148 | ALOXE3        | 2.894 | 0.005 | 0.068   | 2.491  | 1.000 | 0.059   | 0.010   |
| ENSG00000103569 | AQP9          | 2.893 | 0.005 | 0.339   | 1.449  | 0.527 | 0.061   | 0.032   |
| ENSG00000081041 | CXCL2         | 2.892 | 0.000 | 3.235   | 2.216  | 0.014 | 2.363   | 0.950   |
| ENSG00000141497 | ZMYND15       | 2.890 | 0.000 | 2.879   | 2.769  | 0.000 | 2.723   | 0.975   |
| ENSG00000242247 | ARFGAP3       | 2.890 | 0.000 | 40.695  | 2.381  | 0.000 | 33.068  | 13.985  |
| ENSG00000125046 | SSUH2         | 2.870 | 0.000 | 3.342   | 2.210  | 0.004 | 2.484   | 1.082   |
| ENSG00000132329 | RAMP1         | 2.870 | 0.000 | 2.934   | 2.051  | 0.035 | 1.989   | 0.886   |
| ENSG00000131188 | PRR7          | 2.865 | 0.000 | 1.289   | 1.793  | 0.017 | 0.772   | 0.435   |
| ENSG00000203499 | FAM83H-AS1    | 2.864 | 0.000 | 4.123   | 2.559  | 0.000 | 3.679   | 1.422   |
| ENSG00000188660 | LINC00319     | 2.862 | 0.001 | 0.245   | 2.572  | 0.008 | 0.224   | 0.069   |
| ENSG00000128165 | ADM2          | 2.861 | 0.000 | 4.049   | 3.021  | 0.000 | 4.263   | 1.367   |
| ENSG00000079337 | RAPGEF3       | 2.860 | 0.000 | 3.563   | 2.534  | 0.000 | 3.108   | 1.220   |
| ENSG00000069482 | GAL           | 2.858 | 0.003 | 0.803   | 2.266  | 0.063 | 0.591   | 0.196   |
| ENSG00000144908 | ALDH1L1       | 2.855 | 0.000 | 12.635  | 2.017  | 0.018 | 8.694   | 4.061   |
| ENSG00000163191 | S100A11       | 2.853 | 0.000 | 503.114 | 2.135  | 0.000 | 365.748 | 171.499 |
| ENSG00000181085 | MAPK15        | 2.847 | 0.000 | 1.581   | 2.409  | 0.001 | 1.335   | 0.521   |
| ENSG00000137198 | GMPR          | 2.845 | 0.000 | 3.538   | 2.269  | 0.000 | 2.799   | 1.224   |
| ENSG00000170345 | FOS           | 2.838 | 0.001 | 37.604  | 1.575  | 0.347 | 17.005  | 9.650   |
| ENSG00000092445 | TYRO3         | 2.829 | 0.000 | 0.872   | 2.089  | 0.000 | 0.630   | 0.303   |
| ENSG00000165046 | LETM2         | 2.825 | 0.000 | 0.508   | 1.451  | 0.279 | 0.246   | 0.171   |
| ENSG00000173846 | PLK3          | 2.824 | 0.000 | 4.551   | 1.915  | 0.000 | 2.984   | 1.615   |
| ENSG00000006534 | ALDH3B1       | 2.818 | 0.000 | 9.156   | 2.501  | 0.000 | 8.060   | 3.289   |
| ENSG00000135318 | NTSE          | 2.817 | 0.000 | 30.721  | 2.729  | 0.000 | 29.927  | 10.583  |
| ENSG00000227755 | AP000344.4    | 2.811 | 0.001 | 1.930   | 1.474  | 0.430 | 0.877   | 0.543   |
| ENSG00000244300 | RP11-475N22.4 | 2.811 | 0.002 | 0.773   | 3.263  | 0.001 | 1.000   | 0.217   |
| ENSG00000254521 | SIGLEC12      | 2.804 | 0.000 | 2.975   | 2.015  | 0.064 | 1.966   | 0.881   |
| ENSG00000188157 | AGRN          | 2.799 | 0.000 | 20.234  | 2.107  | 0.000 | 14.862  | 7.145   |
| ENSG00000178752 | FAM132B       | 2.793 | 0.003 | 0.282   | 3.256  | 0.002 | 0.363   | 0.072   |
| ENSG00000142484 | TM4SF5        | 2.773 | 0.000 | 35.740  | 2.623  | 0.000 | 32.932  | 12.371  |
| ENSG00000120149 | MSX2          | 2.769 | 0.002 | 1.083   | 2.419  | 0.026 | 0.978   | 0.290   |
| ENSG00000073067 | CYP2W1        | 2.769 | 0.001 | 0.837   | 2.605  | 0.007 | 0.786   | 0.243   |
| ENSG00000257433 | RP1-197B17.3  | 2.769 | 0.000 | 1.899   | 2.412  | 0.000 | 1.620   | 0.671   |
| ENSG00000113070 | HBEGF         | 2.755 | 0.000 | 10.355  | 1.975  | 0.025 | 6.942   | 3.410   |
| ENSG00000159363 | ATP13A2       | 2.751 | 0.000 | 26.003  | 2.176  | 0.000 | 19.892  | 9.538   |
| ENSG00000099960 | SLC7A4        | 2.746 | 0.000 | 2.872   | 2.678  | 0.000 | 2.756   | 1.012   |
| ENSG00000164171 | ITGA2         | 2.744 | 0.000 | 17.757  | 2.068  | 0.006 | 13.148  | 6.103   |
| ENSG00000134323 | MYCN          | 2.739 | 0.000 | 1.966   | 2.042  | 0.013 | 1.460   | 0.673   |
| ENSG00000222033 | LINC01124     | 2.738 | 0.001 | 0.331   | 2.950  | 0.002 | 0.371   | 0.096   |
| ENSG00000054598 | FOXC1         | 2.736 | 0.000 | 0.333   | 3.505  | 0.000 | 0.442   | 0.103   |
| ENSG00000161921 | CXCL16        | 2.734 | 0.000 | 38.137  | 2.424  | 0.000 | 32.961  | 14.022  |
| ENSG00000135253 | KCP           | 2.732 | 0.000 | 3.119   | 2.596  | 0.000 | 2.937   | 1.140   |
| ENSG00000186474 | KLK12         | 2.730 | 0.003 | 0.754   | 2.686  | 0.012 | 0.771   | 0.187   |
| ENSG00000163737 | PF4           | 2.729 | 0.003 | 1.571   | 2.039  | 0.100 | 1.116   | 0.411   |
| ENSG00000168481 | LGI3          | 2.727 | 0.006 | 0.086   | 1.676  | 0.324 | 0.203   | 0.022   |
| ENSG00000214376 | VSTM5         | 2.724 | 0.000 | 2.608   | 2.441  | 0.000 | 2.297   | 0.920   |
| ENSG00000124216 | SNAI1         | 2.723 | 0.000 | 0.845   | 1.467  | 0.288 | 0.422   | 0.288   |
| ENSG00000010310 | GIPR          | 2.719 | 0.000 | 13.095  | 2.396  | 0.000 | 11.441  | 4.658   |
| ENSG00000124588 | NQO2          | 2.715 | 0.000 | 7.253   | 2.948  | 0.000 | 7.738   | 2.590   |
| ENSG00000169894 | MUC3A         | 2.713 | 0.000 | 86.319  | 2.572  | 0.000 | 80.694  | 31.394  |
| ENSG00000115648 | MLPH          | 2.713 | 0.000 | 33.528  | 2.421  | 0.000 | 29.481  | 12.337  |
| ENSG00000088386 | SLC15A1       | 2.705 | 0.006 | 5.472   | 2.443  | 0.039 | 4.764   | 1.331   |
| ENSG00000203688 | RP11-351J23.1 | 2.705 | 0.000 | 0.485   | 3.487  | 0.000 | 0.654   | 0.157   |
| ENSG00000158825 | CDA           | 2.705 | 0.000 | 51.107  | 2.447  | 0.001 | 45.226  | 17.304  |
| ENSG00000167800 | TBX10         | 2.703 | 0.001 | 10.495  | 1.938  | 0.099 | 7.050   | 3.227   |
| ENSG00000133488 | SEC14L4       | 2.696 | 0.007 | 0.119   | -1.048 | 1.000 | 0.030   | 0.034   |
| ENSG00000133519 | ZDHC8P1       | 2.696 | 0.000 | 1.470   | 2.518  | 0.002 | 1.351   | 0.472   |
| ENSG00000250218 | ALDH1L1-AS1   | 2.694 | 0.000 | 15.142  | 1.920  | 0.037 | 10.342  | 5.126   |
| ENSG00000108001 | EBF3          | 2.693 | 0.002 | 0.114   | 2.359  | 0.026 | 0.099   | 0.032   |
| ENSG00000177076 | ACER2         | 2.692 | 0.000 | 6.341   | 2.420  | 0.006 | 5.802   | 2.105   |
| ENSG00000245311 | RP11-165P7.1  | 2.680 | 0.003 | 0.808   | 2.323  | 0.033 | 0.705   | 0.246   |

|                 |               |       |       |        |       |       |        |        |
|-----------------|---------------|-------|-------|--------|-------|-------|--------|--------|
| ENSG00000221887 | HMSD          | 2.674 | 0.000 | 2.958  | 2.422 | 0.001 | 2.649  | 1.032  |
| ENSG00000214922 | HLA-F-AS1     | 2.671 | 0.000 | 2.424  | 1.506 | 0.116 | 1.315  | 0.890  |
| ENSG00000008300 | CELSR3        | 2.670 | 0.000 | 1.018  | 3.110 | 0.000 | 1.192  | 0.365  |
| ENSG00000167600 | CYP2S1        | 2.668 | 0.000 | 61.778 | 2.443 | 0.000 | 54.866 | 22.299 |
| ENSG00000104522 | TSTA3         | 2.668 | 0.000 | 48.087 | 2.123 | 0.000 | 37.304 | 18.359 |
| ENSG00000225187 | AC073283.7    | 2.667 | 0.004 | 0.633  | 2.346 | 0.039 | 0.555  | 0.194  |
| ENSG00000137857 | DUOX1         | 2.663 | 0.000 | 1.435  | 2.612 | 0.001 | 1.419  | 0.492  |
| ENSG00000104881 | PPP1R13L      | 2.661 | 0.000 | 10.937 | 2.061 | 0.000 | 8.256  | 4.150  |
| ENSG00000115297 | TLX2          | 2.657 | 0.000 | 0.650  | 3.011 | 0.000 | 0.765  | 0.227  |
| ENSG00000149798 | CDC42EP2      | 2.655 | 0.000 | 9.161  | 2.050 | 0.000 | 6.816  | 3.436  |
| ENSG00000179403 | VWA1          | 2.655 | 0.000 | 9.695  | 2.105 | 0.000 | 7.531  | 3.655  |
| ENSG00000159374 | M1AP          | 2.652 | 0.001 | 0.398  | 1.055 | 0.940 | 0.128  | 0.127  |
| ENSG00000120738 | EGR1          | 2.651 | 0.002 | 13.079 | 1.825 | 0.159 | 8.011  | 3.794  |
| ENSG00000213996 | TM6SF2        | 2.648 | 0.000 | 18.200 | 1.855 | 0.043 | 11.956 | 6.398  |
| ENSG00000123989 | CHPF          | 2.647 | 0.000 | 24.366 | 2.117 | 0.000 | 19.178 | 9.342  |
| ENSG00000132481 | TRIM47        | 2.647 | 0.000 | 20.974 | 2.080 | 0.000 | 15.949 | 8.035  |
| ENSG00000111962 | UST           | 2.643 | 0.000 | 1.801  | 1.369 | 0.323 | 0.887  | 0.658  |
| ENSG00000182646 | FAM156A       | 2.642 | 0.013 | 0.069  | 1.373 | 1.000 | 0.022  | 0.010  |
| ENSG00000162576 | MXRA8         | 2.640 | 0.000 | 18.964 | 2.087 | 0.000 | 14.631 | 7.196  |
| ENSG00000204538 | PSORS1C2      | 2.638 | 0.008 | 3.077  | 1.237 | 0.739 | 1.076  | 0.787  |
| ENSG00000211787 | TRAV8-3       | 2.638 | 0.004 | 0.878  | 1.415 | 0.526 | 0.393  | 0.246  |
| ENSG00000060558 | GNA15         | 2.634 | 0.000 | 4.359  | 2.290 | 0.000 | 3.703  | 1.627  |
| ENSG00000254548 | RP11-429J17.5 | 2.630 | 0.002 | 2.111  | 2.062 | 0.069 | 1.588  | 0.637  |
| ENSG00000114378 | HYAL1         | 2.624 | 0.000 | 11.981 | 1.844 | 0.054 | 8.190  | 4.263  |
| ENSG00000169469 | SPRR1B        | 2.622 | 0.003 | 0.255  | 1.100 | 1.000 | 0.503  | 0.000  |
| ENSG00000165935 | SMCO2         | 2.618 | 0.011 | 0.133  | 2.073 | 1.000 | 0.097  | 0.028  |
| ENSG00000145649 | GZMA          | 2.617 | 0.000 | 20.319 | 1.780 | 0.043 | 13.129 | 7.308  |
| ENSG00000117834 | SLC5A9        | 2.617 | 0.000 | 2.645  | 2.058 | 0.026 | 2.035  | 0.911  |
| ENSG00000158816 | VWASB1        | 2.614 | 0.007 | 0.215  | 1.481 | 0.467 | 0.233  | 0.063  |
| ENSG00000011422 | PLAUR         | 2.612 | 0.000 | 39.916 | 2.278 | 0.001 | 33.743 | 14.574 |
| ENSG00000157613 | CREB3L1       | 2.611 | 0.000 | 47.844 | 2.187 | 0.000 | 39.325 | 18.517 |
| ENSG00000130475 | FCHO1         | 2.610 | 0.000 | 4.539  | 1.965 | 0.000 | 3.342  | 1.748  |
| ENSG00000232756 | RP5-1185I7.1  | 2.609 | 0.000 | 2.338  | 2.167 | 0.005 | 1.893  | 0.838  |
| ENSG00000131019 | ULBP3         | 2.607 | 0.000 | 0.691  | 2.934 | 0.000 | 0.802  | 0.236  |
| ENSG00000131203 | IDO1          | 2.606 | 0.000 | 3.972  | 1.100 | 0.865 | 1.415  | 1.335  |
| ENSG00000130513 | GDF15         | 2.606 | 0.000 | 11.648 | 2.288 | 0.001 | 9.934  | 4.206  |
| ENSG00000152208 | GRID2         | 2.605 | 0.011 | 0.020  | 3.041 | 1.000 | 0.027  | 0.002  |
| ENSG00000114854 | TNNC1         | 2.601 | 0.007 | 0.546  | 2.672 | 0.015 | 0.568  | 0.141  |
| ENSG00000174307 | PHLDA3        | 2.599 | 0.000 | 6.917  | 2.200 | 0.000 | 5.719  | 2.648  |
| ENSG00000256604 | AC093668.2    | 2.598 | 0.004 | 0.423  | 1.823 | 0.189 | 0.268  | 0.120  |
| ENSG00000140511 | HAPLN3        | 2.598 | 0.000 | 2.663  | 1.162 | 0.740 | 1.063  | 0.957  |
| ENSG00000164951 | PDP1          | 2.591 | 0.000 | 7.303  | 2.534 | 0.000 | 7.050  | 2.723  |
| ENSG00000007933 | FMO3          | 2.589 | 0.003 | 0.336  | 2.607 | 0.011 | 0.351  | 0.101  |
| ENSG00000187905 | AC002472.13   | 2.586 | 0.014 | 0.032  | 3.417 | 1.000 | 0.048  | 0.005  |
| ENSG00000069011 | PITX1         | 2.583 | 0.000 | 8.835  | 1.857 | 0.000 | 6.221  | 3.456  |
| ENSG00000254109 | RBPM5-AS1     | 2.579 | 0.000 | 1.902  | 2.001 | 0.001 | 1.439  | 0.719  |
| ENSG00000131037 | EPS8L1        | 2.575 | 0.000 | 26.287 | 2.230 | 0.000 | 22.055 | 9.959  |
| ENSG00000142178 | SIK1          | 2.574 | 0.000 | 4.010  | 1.972 | 0.020 | 2.927  | 1.438  |
| ENSG00000132470 | ITGB4         | 2.573 | 0.000 | 85.183 | 2.029 | 0.000 | 66.036 | 33.728 |
| ENSG00000147869 | CER1          | 2.568 | 0.009 | 0.068  | 1.151 | 1.000 | 0.109  | 0.000  |
| ENSG00000138028 | CGREF1        | 2.567 | 0.000 | 4.333  | 2.589 | 0.000 | 4.378  | 1.643  |
| ENSG00000259230 | CTD-2555C10.3 | 2.566 | 0.001 | 1.927  | 1.562 | 0.281 | 1.075  | 0.662  |
| ENSG00000177738 | CTD-2201E18.3 | 2.563 | 0.000 | 2.107  | 1.914 | 0.000 | 1.538  | 0.828  |
| ENSG00000114019 | AMOTL2        | 2.563 | 0.000 | 3.812  | 2.029 | 0.000 | 2.988  | 1.485  |
| ENSG00000214733 | RP11-429J17.8 | 2.548 | 0.004 | 0.393  | 2.367 | 0.026 | 0.364  | 0.114  |
| ENSG00000143217 | PVRL4         | 2.548 | 0.000 | 3.408  | 2.189 | 0.000 | 2.915  | 1.307  |
| ENSG00000162772 | ATF3          | 2.545 | 0.001 | 8.400  | 2.070 | 0.039 | 6.455  | 2.824  |
| ENSG00000242590 | RP11-5407.14  | 2.544 | 0.000 | 37.274 | 2.055 | 0.000 | 29.307 | 14.515 |
| ENSG00000162630 | B3GALT2       | 2.543 | 0.000 | 1.495  | 2.703 | 0.000 | 1.606  | 0.554  |
| ENSG00000125571 | IL37          | 2.542 | 0.004 | 0.713  | 1.667 | 0.272 | 0.424  | 0.220  |
| ENSG00000230882 | AC005077.14   | 2.542 | 0.000 | 2.400  | 2.018 | 0.000 | 1.880  | 0.947  |
| ENSG00000178404 | DDC8          | 2.536 | 0.000 | 7.655  | 2.227 | 0.000 | 6.586  | 3.008  |
| ENSG00000166523 | CLEC4E        | 2.535 | 0.006 | 0.300  | 1.329 | 0.612 | 0.124  | 0.087  |
| ENSG00000108688 | CCL7          | 2.534 | 0.002 | 0.657  | 1.546 | 0.346 | 0.368  | 0.210  |
| ENSG00000234602 | MCIDAS        | 2.533 | 0.010 | 0.221  | 3.022 | 0.005 | 0.296  | 0.067  |
| ENSG00000151883 | PARP8         | 2.531 | 0.000 | 3.146  | 2.471 | 0.000 | 3.073  | 1.195  |
| ENSG00000132744 | ACY3          | 2.531 | 0.000 | 17.877 | 1.994 | 0.001 | 13.946 | 7.016  |
| ENSG00000197635 | DPP4          | 2.529 | 0.000 | 25.058 | 2.105 | 0.001 | 20.512 | 9.639  |
| ENSG00000171811 | TTC40         | 2.526 | 0.004 | 0.059  | 2.564 | 0.012 | 0.062  | 0.019  |
| ENSG00000187608 | ISG15         | 2.517 | 0.000 | 42.378 | 2.680 | 0.000 | 44.202 | 15.652 |
| ENSG00000087494 | PTHLH         | 2.517 | 0.005 | 0.087  | 1.683 | 0.277 | 0.055  | 0.027  |
| ENSG00000251258 | RFPL4B        | 2.511 | 0.002 | 0.271  | 1.121 | 1.000 | 0.004  | 0.000  |
| ENSG00000131746 | TNS4          | 2.510 | 0.000 | 8.649  | 1.843 | 0.028 | 6.200  | 3.293  |
| ENSG00000158874 | APOA2         | 2.510 | 0.019 | 0.339  | 1.551 | 1.000 | 0.138  | 0.315  |
| ENSG00000224167 | RP3-522D1.1   | 2.509 | 0.001 | 1.177  | 1.646 | 0.226 | 0.724  | 0.408  |



|                 |               |       |       |          |        |       |         |         |
|-----------------|---------------|-------|-------|----------|--------|-------|---------|---------|
| ENSG00000115590 | IL1R2         | 2.509 | 0.000 | 40.458   | 1.516  | 0.116 | 23.365  | 15.816  |
| ENSG00000084674 | APOB          | 2.507 | 0.020 | 0.229    | 1.318  | 0.661 | 0.071   | 0.022   |
| ENSG00000211727 | TRBV7-6       | 2.506 | 0.009 | 0.618    | 1.120  | 1.000 | 0.205   | 0.186   |
| ENSG00000223552 | RP11-24F11.2  | 2.505 | 0.000 | 2.928    | 2.096  | 0.002 | 2.413   | 1.148   |
| ENSG00000124602 | UNC5CL        | 2.504 | 0.000 | 6.275    | 2.196  | 0.002 | 5.476   | 2.396   |
| ENSG00000163975 | MF12          | 2.503 | 0.000 | 3.006    | 2.128  | 0.003 | 2.487   | 1.157   |
| ENSG00000138166 | DUSP5         | 2.502 | 0.000 | 30.120   | 1.952  | 0.004 | 22.315  | 11.754  |
| ENSG00000166589 | CDH16         | 2.501 | 0.006 | 0.193    | 1.815  | 0.192 | 0.131   | 0.061   |
| ENSG00000178381 | ZFAND2A       | 2.500 | 0.000 | 19.218   | 2.209  | 0.000 | 16.163  | 7.438   |
| ENSG00000228168 | HNRNPA1P21    | 2.499 | 0.006 | 0.392    | 1.830  | 0.183 | 0.263   | 0.121   |
| ENSG00000189343 | RPS2P46       | 2.497 | 0.008 | 9.668    | -1.440 | 0.495 | 3.859   | 4.930   |
| ENSG00000251191 | LINC00589     | 2.493 | 0.002 | 0.371    | 2.044  | 0.055 | 0.294   | 0.129   |
| ENSG00000137962 | ARHGAP29      | 2.492 | 0.000 | 0.935    | 1.544  | 0.119 | 0.556   | 0.365   |
| ENSG00000172061 | LRRCL5        | 2.490 | 0.011 | 0.707    | 2.316  | 0.051 | 0.646   | 0.183   |
| ENSG00000153294 | GPR115        | 2.485 | 0.000 | 2.311    | 2.569  | 0.000 | 2.412   | 0.864   |
| ENSG00000196511 | TPK1          | 2.484 | 0.000 | 3.461    | 1.869  | 0.005 | 2.564   | 1.386   |
| ENSG00000246526 | RP11-539L10.2 | 2.483 | 0.000 | 0.943    | 2.036  | 0.000 | 0.762   | 0.375   |
| ENSG00000166840 | GLYATL1       | 2.481 | 0.001 | 0.162    | 1.751  | 0.154 | 0.107   | 0.056   |
| ENSG00000124780 | KCNK17        | 2.480 | 0.001 | 0.299    | 2.071  | 0.031 | 0.243   | 0.106   |
| ENSG00000197279 | ZNF165        | 2.480 | 0.000 | 4.837    | 2.033  | 0.000 | 3.847   | 1.924   |
| ENSG00000130827 | PLXNA3        | 2.479 | 0.000 | 14.472   | 2.193  | 0.001 | 12.676  | 5.717   |
| ENSG00000131015 | ULBP2         | 2.478 | 0.017 | 0.224    | 2.180  | 1.000 | 0.192   | 0.059   |
| ENSG00000259162 | RP11-203M5.6  | 2.474 | 0.001 | 2.048    | 1.431  | 0.418 | 1.098   | 0.756   |
| ENSG00000137691 | C11orf70      | 2.474 | 0.006 | 0.254    | 2.739  | 0.007 | 0.291   | 0.080   |
| ENSG00000238279 | BX470102.3    | 2.472 | 0.000 | 11.063   | 1.774  | 0.007 | 7.538   | 4.408   |
| ENSG00000106541 | AGR2          | 2.471 | 0.000 | 1104.832 | 2.141  | 0.001 | 937.513 | 431.508 |
| ENSG00000134278 | SPIRE1        | 2.468 | 0.000 | 3.518    | 1.689  | 0.006 | 2.376   | 1.440   |
| ENSG00000187231 | SESTD1        | 2.468 | 0.000 | 4.079    | 1.979  | 0.002 | 3.230   | 1.621   |
| ENSG00000255674 | AC013718.1    | 2.467 | 0.005 | 1.909    | 1.751  | 0.210 | 1.256   | 0.628   |
| ENSG00000153395 | LPCAT1        | 2.467 | 0.000 | 8.952    | 2.014  | 0.000 | 7.169   | 3.637   |
| ENSG00000116285 | ERRFI1        | 2.466 | 0.000 | 27.868   | 2.022  | 0.003 | 22.425  | 10.977  |
| ENSG00000105976 | MET           | 2.458 | 0.000 | 16.093   | 2.275  | 0.000 | 14.840  | 6.482   |
| ENSG0000018280  | SLC11A1       | 2.453 | 0.000 | 0.230    | 1.648  | 0.087 | 0.147   | 0.092   |
| ENSG00000163132 | MSX1          | 2.449 | 0.002 | 0.350    | 2.392  | 0.008 | 0.355   | 0.128   |
| ENSG00000161326 | DUSP14        | 2.447 | 0.000 | 1.891    | 1.526  | 0.042 | 1.145   | 0.786   |
| ENSG00000225680 | AL163953.2    | 2.441 | 0.011 | 0.521    | 2.683  | 0.013 | 0.593   | 0.156   |
| ENSG00000127528 | KLF2          | 2.441 | 0.000 | 11.811   | 1.529  | 0.177 | 6.874   | 4.587   |
| ENSG00000227681 | RP11-307P5.1  | 2.435 | 0.014 | 0.142    | 2.733  | 1.000 | 0.161   | 0.036   |
| ENSG00000167880 | EVPL          | 2.434 | 0.000 | 15.251   | 1.905  | 0.000 | 11.823  | 6.322   |
| ENSG00000188828 | GLRA4         | 2.433 | 0.000 | 1.651    | 1.560  | 0.092 | 1.012   | 0.667   |
| ENSG00000226526 | RP1-37C10.3   | 2.432 | 0.000 | 10.145   | 2.078  | 0.005 | 8.493   | 4.032   |
| ENSG00000003249 | DBNDD1        | 2.431 | 0.001 | 3.083    | 2.496  | 0.004 | 3.234   | 1.129   |
| ENSG00000071575 | TRIB2         | 2.431 | 0.000 | 7.279    | 1.633  | 0.058 | 4.816   | 2.941   |
| ENSG00000248409 | KB-1269D1.8   | 2.422 | 0.007 | 1.045    | 2.715  | 0.006 | 1.219   | 0.334   |
| ENSG00000168209 | DDIT4         | 2.419 | 0.000 | 39.513   | 2.302  | 0.000 | 36.550  | 16.240  |
| ENSG00000150403 | TMCO3         | 2.414 | 0.000 | 26.963   | 2.469  | 0.000 | 27.578  | 11.318  |
| ENSG00000149243 | KLHL35        | 2.413 | 0.000 | 0.253    | 2.240  | 0.005 | 0.232   | 0.097   |
| ENSG00000196420 | S100A5        | 2.407 | 0.004 | 0.625    | 1.502  | 0.388 | 0.361   | 0.216   |
| ENSG00000213412 | HNRNPA1P33    | 2.404 | 0.009 | 0.832    | 1.209  | 0.757 | 0.339   | 0.272   |
| ENSG00000254902 | ANO1-AS1      | 2.402 | 0.000 | 12.514   | 1.886  | 0.002 | 9.787   | 5.238   |
| ENSG00000244026 | FAM86DP       | 2.401 | 0.000 | 2.766    | 1.750  | 0.000 | 1.992   | 1.177   |
| ENSG00000213889 | PPM1N         | 2.398 | 0.000 | 1.480    | 2.194  | 0.001 | 1.340   | 0.610   |
| ENSG00000164070 | HSPA4L        | 2.397 | 0.000 | 1.589    | 2.213  | 0.001 | 1.457   | 0.643   |
| ENSG00000174950 | CD164L2       | 2.397 | 0.014 | 0.180    | 1.442  | 0.509 | 0.090   | 0.053   |
| ENSG00000163577 | EIF5A2        | 2.395 | 0.000 | 0.809    | 2.527  | 0.000 | 0.854   | 0.326   |
| ENSG00000116035 | VAX2          | 2.394 | 0.026 | 0.303    | 2.155  | 0.106 | 0.267   | 0.073   |
| ENSG00000131620 | ANO1          | 2.393 | 0.000 | 6.975    | 1.814  | 0.003 | 5.278   | 2.928   |
| ENSG00000174171 | RP11-23P13.6  | 2.392 | 0.005 | 0.710    | 1.570  | 0.315 | 0.439   | 0.253   |
| ENSG00000197506 | SLC28A3       | 2.392 | 0.000 | 0.953    | 2.298  | 0.001 | 0.918   | 0.382   |
| ENSG00000225462 | FDPSP1        | 2.392 | 0.000 | 1.080    | 1.646  | 0.140 | 0.693   | 0.425   |
| ENSG0000010030  | ETV7          | 2.382 | 0.000 | 3.374    | 1.743  | 0.032 | 2.377   | 1.379   |
| ENSG00000095397 | DFNB31        | 2.381 | 0.000 | 3.833    | 1.468  | 0.094 | 2.288   | 1.616   |
| ENSG00000123358 | NR4A1         | 2.379 | 0.001 | 3.376    | 1.808  | 0.068 | 2.404   | 1.297   |
| ENSG00000085265 | FCN1          | 2.374 | 0.009 | 0.488    | 1.035  | 0.965 | 0.159   | 0.165   |
| ENSG00000189325 | C6orf222      | 2.373 | 0.000 | 12.564   | 2.287  | 0.000 | 11.956  | 5.317   |
| ENSG00000188396 | TCTEX1D4      | 2.372 | 0.001 | 0.809    | 1.734  | 0.106 | 0.567   | 0.309   |
| ENSG00000170956 | CEACAM3       | 2.370 | 0.001 | 0.838    | 2.440  | 0.002 | 0.856   | 0.321   |
| ENSG00000120211 | INSL4         | 2.369 | 0.018 | 0.201    | 2.808  | 1.000 | 0.056   | 0.000   |
| ENSG00000248323 | LUCAT1        | 2.368 | 0.031 | 0.241    | 1.709  | 0.319 | 0.148   | 0.051   |
| ENSG00000180061 | TMEM150B      | 2.368 | 0.000 | 42.815   | 2.015  | 0.002 | 35.521  | 17.859  |
| ENSG00000107819 | SFXN3         | 2.367 | 0.000 | 11.411   | 2.055  | 0.000 | 9.735   | 4.921   |
| ENSG00000187944 | C2orf66       | 2.366 | 0.005 | 0.484    | 2.310  | 0.021 | 0.479   | 0.171   |
| ENSG00000180871 | CXCR2         | 2.364 | 0.003 | 0.471    | 1.234  | 0.686 | 0.222   | 0.185   |
| ENSG00000141526 | SLC16A3       | 2.360 | 0.000 | 76.203   | 1.931  | 0.002 | 59.961  | 32.179  |
| ENSG00000182795 | C1orf116      | 2.358 | 0.000 | 25.774   | 2.000  | 0.000 | 21.513  | 11.068  |

|                 |               |       |       |          |        |       |          |          |
|-----------------|---------------|-------|-------|----------|--------|-------|----------|----------|
| ENSG00000007384 | RHBDF1        | 2.358 | 0.000 | 14.350   | 1.977  | 0.000 | 11.695   | 6.190    |
| ENSG00000099937 | SERPIND1      | 2.358 | 0.011 | 0.191    | -1.027 | 0.974 | 0.063    | 0.067    |
| ENSG00000005238 | FAM214B       | 2.357 | 0.000 | 15.478   | 1.776  | 0.005 | 11.181   | 6.557    |
| ENSG00000164946 | FREM1         | 2.357 | 0.011 | 2.642    | 1.640  | 0.301 | 1.744    | 0.915    |
| ENSG00000226564 | FTH1P20       | 2.356 | 0.004 | 3.039    | 2.133  | 0.039 | 2.631    | 1.099    |
| ENSG00000188536 | HBA2          | 2.356 | 0.010 | 2.388    | 1.558  | 0.361 | 1.329    | 0.812    |
| ENSG00000122778 | KIAA1549      | 2.355 | 0.000 | 1.053    | 1.844  | 0.011 | 0.819    | 0.444    |
| ENSG00000184206 | GOLGA6L4      | 2.354 | 0.027 | 0.036    | 1.871  | 1.000 | 0.028    | 0.010    |
| ENSG00000100228 | RAB36         | 2.353 | 0.000 | 0.830    | 1.818  | 0.023 | 0.623    | 0.343    |
| ENSG00000239474 | KLHL41        | 2.349 | 0.002 | 0.513    | 1.872  | 0.074 | 0.392    | 0.196    |
| ENSG00000254204 | RP11-400K9.3  | 2.340 | 0.017 | 0.661    | 2.026  | 0.114 | 0.568    | 0.204    |
| ENSG00000129467 | ADCY4         | 2.337 | 0.000 | 3.305    | 2.400  | 0.000 | 3.389    | 1.404    |
| ENSG00000186806 | VSIG10L       | 2.330 | 0.000 | 2.011    | 2.604  | 0.000 | 2.210    | 0.832    |
| ENSG00000164283 | ESM1          | 2.323 | 0.028 | 0.254    | 2.205  | 0.085 | 0.246    | 0.072    |
| ENSG00000180801 | AR SJ         | 2.316 | 0.000 | 1.729    | 2.391  | 0.000 | 1.786    | 0.720    |
| ENSG00000214128 | TMEM213       | 2.316 | 0.003 | 0.115    | 1.884  | 0.078 | 0.091    | 0.045    |
| ENSG00000015520 | NPC1L1        | 2.315 | 0.011 | 0.081    | 2.002  | 0.094 | 0.067    | 0.027    |
| ENSG00000114786 | ABHD14A-ACY1  | 2.313 | 0.000 | 49.354   | 1.884  | 0.000 | 39.252   | 21.632   |
| ENSG00000218632 | RPL7P28       | 2.312 | 0.006 | 1.499    | 2.455  | 0.010 | 1.627    | 0.571    |
| ENSG00000197442 | MAP3K5        | 2.312 | 0.000 | 13.242   | 2.064  | 0.000 | 11.719   | 5.757    |
| ENSG00000256553 | TRAV1-2       | 2.312 | 0.015 | 1.003    | 1.171  | 0.806 | 0.386    | 0.342    |
| ENSG00000172183 | ISG20         | 2.311 | 0.000 | 12.290   | 1.997  | 0.004 | 10.339   | 5.208    |
| ENSG00000176855 | KRT18P28      | 2.310 | 0.002 | 0.461    | 2.082  | 0.030 | 0.407    | 0.176    |
| ENSG00000258512 | RP11-796G6.2  | 2.308 | 0.000 | 1.947    | 2.101  | 0.009 | 1.715    | 0.790    |
| ENSG00000139725 | RHOF          | 2.307 | 0.000 | 46.128   | 1.848  | 0.006 | 35.625   | 19.873   |
| ENSG00000153234 | NR4A2         | 2.305 | 0.001 | 2.413    | 1.841  | 0.054 | 1.844    | 0.964    |
| ENSG00000197261 | C6orf141      | 2.305 | 0.000 | 7.953    | 1.838  | 0.030 | 6.189    | 3.313    |
| ENSG00000176903 | PNMA1         | 2.303 | 0.000 | 20.874   | 1.839  | 0.001 | 16.277   | 9.180    |
| ENSG00000129474 | AJUBA         | 2.302 | 0.000 | 1.137    | 1.894  | 0.005 | 0.923    | 0.485    |
| ENSG00000227188 | RP5-1104E15.6 | 2.299 | 0.016 | 0.653    | 2.073  | 0.087 | 0.584    | 0.241    |
| ENSG00000121653 | MAPK8IP1      | 2.299 | 0.000 | 0.987    | 2.496  | 0.000 | 1.057    | 0.428    |
| ENSG00000162645 | GBP2          | 2.298 | 0.000 | 19.970   | 1.601  | 0.013 | 13.670   | 8.738    |
| ENSG00000135472 | FAIM2         | 2.296 | 0.006 | 0.397    | 1.897  | 0.096 | 0.321    | 0.152    |
| ENSG00000134762 | DSC3          | 2.296 | 0.003 | 0.208    | 1.075  | 0.904 | 0.087    | 0.084    |
| ENSG00000138207 | RBP4          | 2.295 | 0.000 | 4.633    | 2.154  | 0.006 | 4.327    | 1.953    |
| ENSG00000182492 | BGN           | 2.295 | 0.000 | 6.153    | 1.854  | 0.012 | 4.848    | 2.637    |
| ENSG00000064666 | CNN2          | 2.294 | 0.000 | 42.471   | 1.810  | 0.000 | 32.720   | 18.820   |
| ENSG00000196730 | DAPK1         | 2.294 | 0.000 | 8.306    | 1.953  | 0.000 | 7.080    | 3.651    |
| ENSG00000179296 | CTGLF12P      | 2.291 | 0.036 | 0.203    | 1.112  | 0.887 | 0.070    | 0.059    |
| ENSG00000139318 | DUSP6         | 2.290 | 0.000 | 30.050   | 1.878  | 0.001 | 24.136   | 13.181   |
| ENSG00000157224 | CLDN12        | 2.290 | 0.000 | 22.539   | 2.403  | 0.000 | 23.648   | 9.618    |
| ENSG00000204345 | CD300LD       | 2.289 | 0.023 | 0.092    | 1.095  | 1.000 | 0.018    | 0.012    |
| ENSG00000198734 | F5            | 2.288 | 0.004 | 0.659    | 2.653  | 0.002 | 0.796    | 0.258    |
| ENSG00000136802 | LRRC8A        | 2.286 | 0.000 | 18.325   | 1.922  | 0.000 | 15.037   | 8.130    |
| ENSG00000136153 | LMO7          | 2.286 | 0.000 | 42.713   | 2.043  | 0.001 | 37.644   | 18.629   |
| ENSG00000230633 | RP11-37E23.5  | 2.284 | 0.002 | 1.784    | 2.348  | 0.004 | 1.816    | 0.724    |
| ENSG00000186081 | KRT5          | 2.284 | 0.034 | 0.036    | 1.692  | 1.000 | 0.022    | 0.008    |
| ENSG00000174145 | KIAA1239      | 2.283 | 0.016 | 0.638    | 2.874  | 0.005 | 0.858    | 0.222    |
| ENSG00000142733 | MAP3K6        | 2.283 | 0.000 | 6.589    | 1.927  | 0.000 | 5.447    | 2.932    |
| ENSG00000140526 | ABHD2         | 2.271 | 0.000 | 56.670   | 1.948  | 0.006 | 48.056   | 24.582   |
| ENSG00000230918 | AC008063.2    | 2.270 | 0.002 | 3.736    | 2.007  | 0.037 | 3.293    | 1.548    |
| ENSG00000198576 | ARC           | 2.270 | 0.034 | 0.095    | 1.754  | 1.000 | 0.068    | 0.028    |
| ENSG00000154217 | PITPNC1       | 2.270 | 0.000 | 8.546    | 1.715  | 0.010 | 6.300    | 3.776    |
| ENSG00000138463 | DIRC2         | 2.270 | 0.000 | 10.405   | 1.970  | 0.000 | 8.872    | 4.681    |
| ENSG00000197956 | S100A6        | 2.268 | 0.000 | 3187.433 | 1.766  | 0.002 | 2387.454 | 1414.209 |
| ENSG00000228838 | RP4-784A16.2  | 2.268 | 0.042 | 0.325    | 1.676  | 1.000 | 0.208    | 0.076    |
| ENSG00000223907 | RP11-439L8.4  | 2.266 | 0.025 | 0.147    | 1.937  | 0.155 | 0.120    | 0.050    |
| ENSG00000133710 | SPINK5        | 2.265 | 0.001 | 5.880    | 2.434  | 0.001 | 6.156    | 2.447    |
| ENSG00000117394 | SLC2A1        | 2.263 | 0.000 | 36.858   | 1.877  | 0.001 | 29.772   | 16.392   |
| ENSG00000213293 | CTD-2666L21.3 | 2.261 | 0.022 | 0.770    | 2.307  | 0.046 | 0.784    | 0.229    |
| ENSG00000078114 | NEBL          | 2.261 | 0.000 | 2.298    | 2.300  | 0.000 | 2.372    | 0.989    |
| ENSG00000166206 | GABRB3        | 2.261 | 0.035 | 0.418    | 1.408  | 0.561 | 0.206    | 0.123    |
| ENSG00000101198 | NKAIN4        | 2.259 | 0.040 | 0.055    | 2.073  | 1.000 | 0.051    | 0.012    |
| ENSG00000166401 | SERPINB8      | 2.258 | 0.000 | 8.490    | 1.829  | 0.014 | 6.709    | 3.685    |
| ENSG00000177409 | SAMD9L        | 2.257 | 0.000 | 12.237   | 1.817  | 0.029 | 9.697    | 5.222    |
| ENSG00000244734 | HBB           | 2.255 | 0.019 | 19.267   | -1.077 | 0.916 | 5.361    | 6.759    |
| ENSG00000151948 | GLT1D1        | 2.254 | 0.038 | 0.066    | 1.146  | 1.000 | 0.023    | 0.020    |
| ENSG00000235162 | C12orf75      | 2.251 | 0.000 | 18.425   | 1.773  | 0.005 | 14.270   | 8.152    |
| ENSG00000223394 | TRBV29OR9-2   | 2.251 | 0.039 | 0.711    | 1.171  | 1.000 | 0.280    | 0.226    |
| ENSG00000128335 | APOL2         | 2.251 | 0.000 | 25.537   | 1.544  | 0.006 | 17.167   | 11.631   |
| ENSG00000133962 | CATSPERB      | 2.250 | 0.000 | 2.527    | 2.439  | 0.000 | 2.761    | 1.092    |
| ENSG00000167460 | TPM4          | 2.247 | 0.000 | 192.192  | 1.992  | 0.000 | 168.687  | 87.107   |
| ENSG00000237429 | RP1-159A19.4  | 2.247 | 0.006 | 1.486    | 2.155  | 0.029 | 1.417    | 0.578    |
| ENSG00000247381 | PDX1-AS1      | 2.244 | 0.044 | 0.102    | 2.446  | 1.000 | 0.121    | 0.024    |
| ENSG00000243989 | ACY1          | 2.244 | 0.000 | 31.391   | 1.843  | 0.000 | 25.191   | 14.226   |

|                 |                |       |       |        |        |       |        |        |
|-----------------|----------------|-------|-------|--------|--------|-------|--------|--------|
| ENSG00000106348 | IMPDH1         | 2.243 | 0.000 | 11.566 | 1.669  | 0.001 | 8.458  | 5.282  |
| ENSG00000154768 | C17orf50       | 2.240 | 0.007 | 0.400  | 1.708  | 0.191 | 0.292  | 0.159  |
| ENSG00000122641 | INHBA          | 2.240 | 0.023 | 0.169  | 1.926  | 0.148 | 0.143  | 0.062  |
| ENSG00000258504 | RP11-638I2.6   | 2.238 | 0.000 | 14.377 | 2.018  | 0.000 | 12.580 | 6.459  |
| ENSG00000233996 | AC013439.4     | 2.238 | 0.043 | 0.124  | 2.617  | 1.000 | 0.152  | 0.025  |
| ENSG00000243766 | HOTTIP         | 2.231 | 0.044 | 5.542  | 2.110  | 0.119 | 5.216  | 1.314  |
| ENSG00000144730 | IL17RD         | 2.231 | 0.001 | 0.194  | 1.882  | 0.045 | 0.161  | 0.081  |
| ENSG00000174827 | PDZK1          | 2.231 | 0.023 | 1.220  | 1.517  | 0.414 | 1.418  | 0.443  |
| ENSG00000151929 | BAG3           | 2.229 | 0.000 | 17.488 | 2.003  | 0.000 | 15.408 | 8.006  |
| ENSG00000232803 | RP11-93B14.5   | 2.227 | 0.000 | 2.568  | 1.740  | 0.059 | 1.967  | 1.120  |
| ENSG00000141756 | FKBP10         | 2.226 | 0.000 | 8.409  | 1.850  | 0.000 | 6.881  | 3.821  |
| ENSG00000167157 | PRRX2          | 2.225 | 0.003 | 0.758  | 1.333  | 0.511 | 0.419  | 0.324  |
| ENSG00000203804 | ADAMTSL4-AS1   | 2.221 | 0.004 | 1.324  | 1.792  | 0.105 | 1.024  | 0.549  |
| ENSG00000176720 | BOK            | 2.221 | 0.000 | 8.967  | 1.764  | 0.001 | 6.967  | 4.103  |
| ENSG00000116039 | ATP6V1B1       | 2.221 | 0.023 | 0.347  | 2.641  | 0.013 | 0.427  | 0.120  |
| ENSG00000101187 | SLCO4A1        | 2.216 | 0.000 | 4.706  | 1.819  | 0.016 | 3.801  | 2.107  |
| ENSG00000254872 | RP13-870H17.3  | 2.216 | 0.000 | 1.860  | 2.037  | 0.002 | 1.673  | 0.826  |
| ENSG00000171552 | BCL2L1         | 2.213 | 0.000 | 47.442 | 1.733  | 0.000 | 36.259 | 22.191 |
| ENSG00000251095 | RP11-115D19.1  | 2.212 | 0.016 | 0.222  | 1.726  | 0.224 | 0.163  | 0.084  |
| ENSG00000143546 | S100A8         | 2.211 | 0.006 | 2.655  | -1.062 | 0.924 | 0.926  | 1.093  |
| ENSG00000246640 | RP11-1094H24.4 | 2.210 | 0.012 | 0.156  | 2.214  | 0.033 | 0.154  | 0.060  |
| ENSG00000224818 | RP11-134G8.8   | 2.209 | 0.006 | 0.848  | 1.805  | 0.118 | 0.674  | 0.349  |
| ENSG00000142765 | SYTL1          | 2.208 | 0.000 | 7.307  | 1.717  | 0.003 | 5.588  | 3.353  |
| ENSG00000126458 | RRAS           | 2.206 | 0.000 | 61.559 | 1.734  | 0.001 | 46.927 | 28.344 |
| ENSG00000205413 | SAMD9          | 2.206 | 0.000 | 17.287 | 2.077  | 0.006 | 16.205 | 7.524  |
| ENSG00000123684 | LPGAT1         | 2.205 | 0.000 | 16.279 | 1.837  | 0.003 | 13.408 | 7.381  |
| ENSG00000125798 | FOXA2          | 2.205 | 0.000 | 5.583  | 2.323  | 0.000 | 5.822  | 2.510  |
| ENSG00000115474 | KCNJ13         | 2.203 | 0.036 | 0.277  | 1.067  | 0.935 | 0.052  | 0.052  |
| ENSG00000186188 | FFAR4          | 2.200 | 0.000 | 13.292 | 2.340  | 0.000 | 13.916 | 6.015  |
| ENSG00000155269 | GPR78          | 2.200 | 0.001 | 0.262  | 2.548  | 0.000 | 0.307  | 0.115  |
| ENSG00000128422 | KRT17          | 2.198 | 0.048 | 0.123  | 4.854  | 0.000 | 0.380  | 0.028  |
| ENSG00000117308 | GALE           | 2.196 | 0.000 | 54.269 | 1.804  | 0.000 | 43.463 | 25.322 |
| ENSG00000157193 | LRP8           | 2.190 | 0.005 | 1.113  | 1.620  | 0.217 | 0.795  | 0.469  |
| ENSG00000168398 | BDKRB2         | 2.189 | 0.000 | 8.658  | 1.938  | 0.000 | 7.604  | 3.989  |
| ENSG00000132259 | CNGA4          | 2.189 | 0.035 | 0.207  | -1.135 | 0.858 | 0.055  | 0.071  |
| ENSG00000103534 | TMC5           | 2.189 | 0.000 | 27.421 | 1.925  | 0.003 | 23.912 | 12.448 |
| ENSG00000129990 | SYT5           | 2.189 | 0.005 | 0.313  | 2.081  | 0.030 | 0.293  | 0.127  |
| ENSG00000103379 | SLC6A13        | 2.188 | 0.047 | 0.037  | 2.220  | 1.000 | 0.036  | 0.009  |
| ENSG00000105717 | PBX4           | 2.186 | 0.000 | 1.970  | 1.843  | 0.000 | 1.645  | 0.916  |
| ENSG00000138152 | BTBD16         | 2.186 | 0.026 | 0.216  | 2.134  | 0.072 | 0.215  | 0.079  |
| ENSG00000107404 | DVL1           | 2.181 | 0.000 | 26.104 | 1.723  | 0.000 | 20.137 | 12.338 |
| ENSG00000166682 | TMPRSS5        | 2.180 | 0.001 | 0.439  | 1.434  | 0.300 | 0.271  | 0.196  |
| ENSG00000158125 | XDH            | 2.177 | 0.000 | 31.274 | 1.721  | 0.032 | 24.432 | 14.244 |
| ENSG00000109107 | ALDOC          | 2.177 | 0.000 | 10.710 | 2.505  | 0.000 | 12.184 | 4.788  |
| ENSG00000161249 | DMKN           | 2.177 | 0.000 | 1.598  | 1.919  | 0.002 | 1.373  | 0.727  |
| ENSG00000113645 | WWC1           | 2.174 | 0.000 | 6.521  | 1.834  | 0.000 | 5.426  | 3.060  |
| ENSG00000226963 | AC078883.4     | 2.173 | 0.009 | 13.285 | 1.835  | 0.111 | 11.155 | 5.585  |
| ENSG00000173237 | C11orf86       | 2.173 | 0.001 | 68.136 | 1.607  | 0.147 | 47.048 | 30.086 |
| ENSG00000105088 | OLFM2          | 2.170 | 0.000 | 1.330  | 1.567  | 0.044 | 0.946  | 0.622  |
| ENSG00000176919 | C8G            | 2.165 | 0.004 | 6.355  | 2.279  | 0.008 | 6.617  | 2.680  |
| ENSG00000112212 | TSPO2          | 2.163 | 0.013 | 0.449  | 2.095  | 0.048 | 0.433  | 0.191  |
| ENSG00000126709 | IFI6           | 2.161 | 0.003 | 24.769 | 2.818  | 0.000 | 32.737 | 10.475 |
| ENSG00000128564 | VGFB           | 2.159 | 0.042 | 0.177  | 4.678  | 0.000 | 0.492  | 0.057  |
| ENSG00000172137 | CALB2          | 2.158 | 0.011 | 1.320  | 1.509  | 0.349 | 0.844  | 0.561  |
| ENSG00000184557 | SOCS3          | 2.157 | 0.001 | 6.639  | 1.478  | 0.271 | 4.315  | 2.907  |
| ENSG00000151640 | DPYSL4         | 2.157 | 0.029 | 0.101  | 1.584  | 0.359 | 0.065  | 0.035  |
| ENSG00000126583 | PRKCG          | 2.155 | 0.013 | 0.513  | 1.593  | 0.289 | 0.363  | 0.208  |
| ENSG00000009950 | MLXIPL         | 2.155 | 0.004 | 2.578  | 1.943  | 0.042 | 2.245  | 1.098  |
| ENSG00000234235 | BOK-AS1        | 2.154 | 0.013 | 0.690  | 1.741  | 0.179 | 0.550  | 0.283  |
| ENSG00000104899 | AMH            | 2.148 | 0.009 | 1.280  | 2.799  | 0.001 | 1.776  | 0.522  |
| ENSG00000214188 | ST7-OT4        | 2.146 | 0.015 | 0.143  | 1.550  | 0.339 | 0.097  | 0.055  |
| ENSG00000100031 | GGT1           | 2.145 | 0.009 | 7.353  | 1.593  | 0.256 | 4.988  | 3.108  |
| ENSG00000068724 | TTC7A          | 2.144 | 0.000 | 11.310 | 1.755  | 0.000 | 9.111  | 5.442  |
| ENSG00000158428 | C2orf62        | 2.144 | 0.020 | 0.095  | 1.624  | 0.296 | 0.066  | 0.035  |
| ENSG00000228140 | RP3-467K16.4   | 2.141 | 0.001 | 0.307  | 1.802  | 0.051 | 0.251  | 0.137  |
| ENSG00000197119 | SLC25A29       | 2.140 | 0.000 | 6.566  | 1.808  | 0.000 | 5.434  | 3.119  |
| ENSG00000134107 | BHLHE40        | 2.140 | 0.000 | 24.002 | 1.777  | 0.013 | 19.504 | 11.144 |
| ENSG00000166016 | ABTB2          | 2.139 | 0.000 | 4.798  | 2.104  | 0.000 | 4.636  | 2.266  |
| ENSG00000141682 | PMAIP1         | 2.139 | 0.000 | 3.476  | 1.831  | 0.025 | 2.928  | 1.573  |
| ENSG00000170537 | TMC7           | 2.137 | 0.000 | 8.024  | 1.867  | 0.001 | 6.887  | 3.778  |
| ENSG00000108379 | WNT3           | 2.135 | 0.015 | 0.481  | 2.142  | 0.040 | 0.481  | 0.202  |
| ENSG00000188573 | FBLL1          | 2.134 | 0.065 | 0.290  | 2.773  | 0.020 | 0.455  | 0.032  |
| ENSG00000145911 | N4BP3          | 2.132 | 0.000 | 0.990  | 1.629  | 0.040 | 0.730  | 0.463  |
| ENSG00000008513 | ST3GAL1        | 2.131 | 0.000 | 4.231  | -1.001 | 0.997 | 4.668  | 2.035  |
| ENSG00000099337 | KCNK6          | 2.130 | 0.000 | 23.869 | 1.836  | 0.000 | 20.101 | 11.516 |

|                 |                |       |       |         |        |       |         |         |
|-----------------|----------------|-------|-------|---------|--------|-------|---------|---------|
| ENSG00000034152 | MAP2K3         | 2.130 | 0.000 | 30.367  | 1.826  | 0.001 | 25.233  | 14.456  |
| ENSG00000255498 | RP11-618K13.2  | 2.129 | 0.005 | 1.646   | 2.433  | 0.003 | 1.873   | 0.706   |
| ENSG00000229891 | Z83851.1       | 2.129 | 0.001 | 1.259   | 1.742  | 0.058 | 0.992   | 0.559   |
| ENSG00000226067 | LINC00869      | 2.128 | 0.004 | 1.268   | 1.460  | 0.332 | 0.847   | 0.559   |
| ENSG00000234928 | AP000344.3     | 2.128 | 0.010 | 1.312   | 1.150  | 0.798 | 0.633   | 0.561   |
| ENSG00000175920 | DOK7           | 2.125 | 0.003 | 0.329   | 1.952  | 0.029 | 0.300   | 0.144   |
| ENSG00000107338 | SHB            | 2.124 | 0.000 | 10.888  | 1.780  | 0.001 | 8.910   | 5.202   |
| ENSG00000078549 | ADCYAP1R1      | 2.122 | 0.047 | 0.079   | -1.117 | 0.880 | 0.022   | 0.029   |
| ENSG00000102962 | CCL22          | 2.121 | 0.012 | 2.159   | 1.054  | 0.937 | 0.935   | 0.932   |
| ENSG00000143333 | RGS16          | 2.120 | 0.001 | 1.616   | 1.624  | 0.100 | 1.202   | 0.739   |
| ENSG00000224805 | LINC00853      | 2.120 | 0.037 | 0.443   | 2.886  | 0.005 | 0.645   | 0.151   |
| ENSG00000138606 | SHF            | 2.119 | 0.000 | 1.661   | 1.984  | 0.002 | 1.561   | 0.777   |
| ENSG00000115919 | KYNU           | 2.119 | 0.000 | 1.685   | 1.640  | 0.071 | 1.250   | 0.779   |
| ENSG00000161132 | Xbac-B444P24.1 | 2.118 | 0.044 | 0.319   | 1.452  | 0.502 | 0.194   | 0.116   |
| ENSG00000160870 | CYP3A7         | 2.118 | 0.005 | 0.217   | 2.268  | 0.007 | 0.237   | 0.094   |
| ENSG00000182327 | GLTPD2         | 2.118 | 0.000 | 2.321   | 1.729  | 0.036 | 1.849   | 1.086   |
| ENSG00000231133 | HAR1B          | 2.116 | 0.030 | 1.090   | 1.196  | 0.771 | 0.533   | 0.446   |
| ENSG00000124635 | HIST1H2BJ      | 2.116 | 0.001 | 2.124   | 1.558  | 0.146 | 1.521   | 0.980   |
| ENSG00000158859 | ADAMTS4        | 2.113 | 0.009 | 0.324   | 1.242  | 0.660 | 0.173   | 0.141   |
| ENSG00000183092 | BEGAIN         | 2.113 | 0.007 | 0.281   | 3.019  | 0.000 | 0.409   | 0.121   |
| ENSG00000103855 | CD276          | 2.112 | 0.000 | 9.659   | 1.974  | 0.000 | 8.877   | 4.716   |
| ENSG00000111907 | TPD52L1        | 2.112 | 0.000 | 3.805   | 1.643  | 0.034 | 2.947   | 1.800   |
| ENSG00000151689 | INPP1          | 2.110 | 0.000 | 19.599  | 1.642  | 0.017 | 14.826  | 9.328   |
| ENSG00000106927 | AMBP           | 2.109 | 0.010 | 0.536   | 1.653  | 0.204 | 0.400   | 0.227   |
| ENSG00000115641 | FHL2           | 2.109 | 0.000 | 28.017  | 1.688  | 0.002 | 21.947  | 13.564  |
| ENSG00000246022 | ALDH1L1-AS2    | 2.108 | 0.014 | 1.097   | 1.632  | 0.241 | 0.826   | 0.471   |
| ENSG00000175938 | ORAI3          | 2.108 | 0.000 | 11.547  | 1.817  | 0.000 | 9.717   | 5.604   |
| ENSG00000157227 | MMP14          | 2.105 | 0.000 | 41.227  | 1.478  | 0.010 | 28.364  | 20.148  |
| ENSG00000188735 | TMEM120B       | 2.105 | 0.000 | 20.003  | 1.723  | 0.007 | 15.837  | 9.608   |
| ENSG00000186912 | P2RY4          | 2.102 | 0.034 | 0.953   | 1.464  | 0.458 | 0.617   | 0.387   |
| ENSG00000253785 | CTC-308K20.3   | 2.099 | 0.005 | 0.616   | 1.790  | 0.086 | 0.520   | 0.272   |
| ENSG00000132746 | ALDH3B2        | 2.098 | 0.026 | 0.127   | 1.389  | 0.526 | 0.075   | 0.049   |
| ENSG00000155093 | PTPRN2         | 2.097 | 0.000 | 8.914   | 2.053  | 0.000 | 8.703   | 4.364   |
| ENSG00000235999 | RP11-403I13.8  | 2.096 | 0.000 | 1.213   | 1.507  | 0.137 | 0.843   | 0.563   |
| ENSG00000179772 | FOXS1          | 2.095 | 0.010 | 0.400   | 1.501  | 0.339 | 0.266   | 0.169   |
| ENSG00000167711 | SERPINF2       | 2.094 | 0.000 | 1.105   | 1.710  | 0.049 | 0.869   | 0.513   |
| ENSG00000088002 | SULT2B1        | 2.091 | 0.001 | 4.897   | 1.630  | 0.115 | 3.748   | 2.285   |
| ENSG00000256545 | AL139819.1     | 2.091 | 0.025 | 59.601  | 1.593  | 0.311 | 43.458  | 24.910  |
| ENSG00000176933 | TOB2P1         | 2.090 | 0.012 | 0.338   | 1.544  | 0.310 | 0.247   | 0.152   |
| ENSG00000108691 | CCL2           | 2.090 | 0.000 | 24.791  | 1.015  | 0.978 | 11.076  | 11.491  |
| ENSG00000151090 | THRB           | 2.090 | 0.023 | 2.174   | 2.465  | 0.014 | 2.659   | 0.881   |
| ENSG00000230701 | FBXW4P1        | 2.089 | 0.013 | 0.310   | 1.590  | 0.274 | 0.220   | 0.132   |
| ENSG00000103253 | HAGHL          | 2.088 | 0.001 | 1.739   | 1.605  | 0.128 | 1.271   | 0.799   |
| ENSG00000213413 | PVRIG          | 2.087 | 0.000 | 2.491   | 1.693  | 0.024 | 1.978   | 1.179   |
| ENSG00000134138 | MEIS2          | 2.087 | 0.000 | 0.510   | 1.911  | 0.001 | 0.462   | 0.247   |
| ENSG00000140835 | CHST4          | 2.086 | 0.045 | 0.280   | 1.248  | 0.717 | 0.140   | 0.104   |
| ENSG00000099194 | SCD            | 2.085 | 0.022 | 50.736  | 1.599  | 0.293 | 37.281  | 21.516  |
| ENSG00000171345 | KRT19          | 2.085 | 0.000 | 931.536 | 1.843  | 0.004 | 787.749 | 445.208 |
| ENSG00000204618 | RNF39          | 2.081 | 0.000 | 4.794   | 2.141  | 0.000 | 4.801   | 2.326   |
| ENSG00000255306 | RP5-901A4.1    | 2.081 | 0.001 | 1.283   | 1.502  | 0.209 | 0.896   | 0.616   |
| ENSG00000257582 | RP11-129J12.2  | 2.080 | 0.011 | 0.537   | 1.821  | 0.102 | 0.463   | 0.232   |
| ENSG00000172819 | RARG           | 2.080 | 0.000 | 4.692   | 1.615  | 0.002 | 3.613   | 2.313   |
| ENSG00000235772 | AP001625.6     | 2.080 | 0.018 | 2.542   | 2.402  | 0.012 | 3.047   | 1.099   |
| ENSG00000175445 | LPL            | 2.080 | 0.016 | 0.918   | 1.820  | 0.124 | 0.796   | 0.394   |
| ENSG00000179869 | ABCA13         | 2.079 | 0.027 | 0.104   | 1.970  | 0.096 | 0.101   | 0.043   |
| ENSG00000257524 | RP11-203J24.9  | 2.078 | 0.000 | 88.606  | 1.683  | 0.024 | 69.277  | 42.469  |
| ENSG00000150630 | VEGFC          | 2.077 | 0.000 | 0.479   | 1.694  | 0.043 | 0.380   | 0.229   |
| ENSG00000258973 | RP11-934B9.3   | 2.074 | 0.000 | 29.297  | 1.799  | 0.000 | 24.806  | 14.497  |
| ENSG00000110047 | EHD1           | 2.074 | 0.000 | 15.372  | 1.796  | 0.000 | 13.018  | 7.625   |
| ENSG00000182870 | GALNT9         | 2.074 | 0.009 | 0.204   | 1.437  | 0.389 | 0.133   | 0.089   |
| ENSG00000243444 | PALM2          | 2.074 | 0.013 | 0.126   | 1.907  | 0.076 | 0.117   | 0.057   |
| ENSG00000008853 | RHOBTB2        | 2.072 | 0.000 | 4.072   | 1.651  | 0.020 | 3.168   | 1.975   |
| ENSG00000128342 | LIF            | 2.070 | 0.000 | 8.371   | 1.710  | 0.007 | 6.866   | 4.089   |
| ENSG00000237286 | AC004906.3     | 2.069 | 0.004 | 1.534   | 1.143  | 0.783 | 0.783   | 0.708   |
| ENSG00000197520 | FAM177B        | 2.069 | 0.002 | 6.162   | 1.858  | 0.032 | 5.515   | 2.885   |
| ENSG00000028137 | TNFRSF1B       | 2.065 | 0.000 | 20.240  | 1.917  | 0.000 | 18.262  | 10.039  |
| ENSG00000111696 | NT5DC3         | 2.064 | 0.000 | 1.974   | 1.873  | 0.007 | 1.769   | 0.947   |
| ENSG00000241886 | RP11-242C19.2  | 2.064 | 0.021 | 1.255   | 1.321  | 0.586 | 0.740   | 0.554   |
| ENSG00000114626 | ABTB1          | 2.064 | 0.000 | 8.551   | 1.801  | 0.001 | 7.283   | 4.184   |
| ENSG00000244617 | ASPRV1         | 2.062 | 0.000 | 1.410   | 1.637  | 0.048 | 1.080   | 0.677   |
| ENSG00000129465 | RIPK3          | 2.058 | 0.000 | 32.045  | 1.794  | 0.000 | 27.294  | 16.026  |
| ENSG00000100170 | SLC5A1         | 2.056 | 0.001 | 17.281  | 1.862  | 0.022 | 15.602  | 8.212   |
| ENSG00000225308 | ASS1P11        | 2.055 | 0.024 | 2.032   | 1.562  | 0.320 | 1.455   | 0.890   |
| ENSG00000167759 | KLK13          | 2.049 | 0.015 | 1.102   | 1.652  | 0.210 | 0.868   | 0.489   |
| ENSG00000124557 | BTN1A1         | 2.049 | 0.044 | 0.136   | 1.455  | 0.478 | 0.090   | 0.056   |

|                 |               |       |       |          |        |       |         |         |
|-----------------|---------------|-------|-------|----------|--------|-------|---------|---------|
| ENSG00000165695 | AK8           | 2.048 | 0.008 | 0.190    | 1.382  | 0.448 | 0.120   | 0.084   |
| ENSG00000226380 | MIR29A        | 2.048 | 0.002 | 0.803    | 1.581  | 0.143 | 0.601   | 0.383   |
| ENSG00000198286 | CARD11        | 2.047 | 0.000 | 4.202    | 1.054  | 0.904 | 2.013   | 2.032   |
| ENSG00000198113 | TOR4A         | 2.047 | 0.000 | 24.583   | 1.799  | 0.000 | 20.953  | 12.226  |
| ENSG00000187862 | TTC24         | 2.046 | 0.046 | 0.206    | -1.412 | 0.536 | 0.046   | 0.084   |
| ENSG00000119899 | SLC17A5       | 2.046 | 0.000 | 34.783   | 1.950  | 0.000 | 32.595  | 17.309  |
| ENSG00000065618 | COL17A1       | 2.043 | 0.000 | 88.213   | 1.692  | 0.007 | 71.645  | 43.813  |
| ENSG00000105355 | PLIN3         | 2.043 | 0.000 | 90.964   | 1.747  | 0.002 | 75.489  | 45.571  |
| ENSG00000184979 | USP18         | 2.043 | 0.000 | 2.191    | 2.037  | 0.003 | 2.177   | 1.065   |
| ENSG00000124225 | PMEP1         | 2.042 | 0.000 | 9.373    | 1.696  | 0.016 | 7.660   | 4.611   |
| ENSG00000197324 | LRP10         | 2.042 | 0.000 | 91.706   | 1.665  | 0.000 | 73.167  | 46.422  |
| ENSG00000226383 | AC093375.1    | 2.042 | 0.016 | 0.728    | 1.797  | 0.124 | 0.626   | 0.326   |
| ENSG00000198355 | PIM3          | 2.041 | 0.000 | 28.218   | 1.608  | 0.001 | 21.543  | 14.177  |
| ENSG00000176092 | AIM1L         | 2.040 | 0.000 | 9.226    | 1.819  | 0.005 | 8.076   | 4.573   |
| ENSG00000142623 | PADI1         | 2.040 | 0.018 | 0.298    | 1.901  | 0.085 | 0.281   | 0.134   |
| ENSG00000006453 | BAIAP2L1      | 2.040 | 0.000 | 54.546   | 1.743  | 0.000 | 45.614  | 27.416  |
| ENSG00000258691 | RP11-404P21.8 | 2.040 | 0.000 | 9.554    | 1.799  | 0.009 | 8.389   | 4.682   |
| ENSG00000176153 | GPX2          | 2.037 | 0.000 | 218.395  | 1.939  | 0.000 | 202.803 | 107.856 |
| ENSG00000204335 | SP5           | 2.035 | 0.011 | 0.399    | 3.108  | 0.000 | 0.653   | 0.179   |
| ENSG00000109089 | CDR2L         | 2.034 | 0.000 | 2.055    | 1.708  | 0.003 | 1.684   | 1.028   |
| ENSG00000221843 | C2orf16       | 2.034 | 0.001 | 0.199    | 1.533  | 0.148 | 0.145   | 0.095   |
| ENSG00000127324 | TSPAN8        | 2.034 | 0.000 | 1113.784 | 1.660  | 0.001 | 888.866 | 558.844 |
| ENSG00000225492 | GBP1P1        | 2.034 | 0.018 | 0.383    | -1.185 | 0.760 | 0.130   | 0.176   |
| ENSG00000146072 | TNFRSF21      | 2.031 | 0.000 | 63.199   | 1.816  | 0.001 | 55.956  | 31.707  |
| ENSG00000142871 | CYR61         | 2.031 | 0.042 | 6.376    | -1.359 | 0.569 | 1.582   | 2.634   |
| ENSG00000100625 | SIX4          | 2.031 | 0.028 | 0.058    | 2.110  | 0.048 | 0.060   | 0.026   |
| ENSG00000136696 | IL36B         | 2.030 | 0.048 | 0.066    | 1.160  | 1.000 | 0.140   | 0.011   |
| ENSG00000157150 | TIMP4         | 2.030 | 0.001 | 1.989    | 1.928  | 0.010 | 1.866   | 0.960   |
| ENSG00000211716 | TRBV9         | 2.029 | 0.045 | 1.314    | 1.017  | 0.984 | 0.526   | 0.542   |
| ENSG00000163947 | ARHGEF3       | 2.028 | 0.000 | 3.139    | 1.746  | 0.004 | 2.680   | 1.566   |
| ENSG00000164078 | MST1R         | 2.028 | 0.000 | 49.475   | 1.751  | 0.001 | 41.879  | 24.993  |
| ENSG00000255737 | AGAP2-AS1     | 2.025 | 0.000 | 3.984    | 1.644  | 0.001 | 3.185   | 2.025   |
| ENSG00000117228 | GBP1          | 2.025 | 0.001 | 10.139   | 1.153  | 0.717 | 5.430   | 4.884   |
| ENSG00000035862 | TIMP2         | 2.023 | 0.000 | 39.703   | 1.809  | 0.000 | 34.778  | 20.086  |
| ENSG00000238278 | ALG1L6P       | 2.021 | 0.004 | 1.472    | 1.619  | 0.141 | 1.154   | 0.698   |
| ENSG00000165905 | GYLTL1B       | 2.018 | 0.002 | 1.112    | 1.762  | 0.052 | 0.971   | 0.532   |
| ENSG00000121594 | CD80          | 2.016 | 0.004 | 0.621    | 1.188  | 0.691 | 0.341   | 0.300   |
| ENSG00000002587 | HS3ST1        | 2.016 | 0.000 | 1.534    | 1.831  | 0.000 | 1.366   | 0.778   |
| ENSG00000163794 | UCN           | 2.016 | 0.011 | 0.946    | 1.591  | 0.226 | 0.700   | 0.425   |
| ENSG00000215915 | ATAD3C        | 2.015 | 0.008 | 0.370    | 1.660  | 0.149 | 0.290   | 0.171   |
| ENSG00000168490 | PHYHIP        | 2.014 | 0.002 | 0.528    | 1.681  | 0.072 | 0.434   | 0.259   |
| ENSG00000145832 | SLC25A48      | 2.014 | 0.002 | 0.721    | 1.804  | 0.032 | 0.647   | 0.355   |
| ENSG00000253868 | FER1L6-AS2    | 2.012 | 0.029 | 2.243    | 1.758  | 0.176 | 1.977   | 1.023   |
| ENSG00000226314 | ZNF192P1      | 2.011 | 0.008 | 0.748    | 1.777  | 0.087 | 0.640   | 0.347   |
| ENSG00000255833 | TIFAB         | 2.009 | 0.000 | 1.663    | 1.267  | 0.415 | 1.021   | 0.833   |
| ENSG00000167772 | ANGPTL4       | 2.009 | 0.009 | 5.398    | 1.606  | 0.194 | 4.122   | 2.584   |
| ENSG00000188760 | TMEM198       | 2.007 | 0.000 | 1.576    | 1.935  | 0.001 | 1.501   | 0.794   |
| ENSG00000214289 | RPL39P5       | 2.005 | 0.000 | 3.684    | 1.774  | 0.007 | 3.205   | 1.840   |
| ENSG00000185467 | KPNA7         | 2.005 | 0.013 | 1.237    | 1.831  | 0.085 | 1.120   | 0.577   |
| ENSG00000120889 | TNFRSF10B     | 2.004 | 0.000 | 19.866   | 1.695  | 0.001 | 16.543  | 10.115  |
| ENSG00000185624 | P4HB          | 2.003 | 0.000 | 286.455  | 1.718  | 0.000 | 240.446 | 147.882 |
| ENSG00000189350 | FAM179A       | 2.002 | 0.002 | 0.124    | 1.628  | 0.100 | 0.098   | 0.060   |
| ENSG00000176170 | SPHK1         | 2.002 | 0.000 | 1.911    | 1.711  | 0.026 | 1.579   | 0.960   |
| ENSG00000181524 | RPL24P4       | 1.999 | 0.015 | 2.336    | 2.234  | 0.013 | 2.603   | 1.057   |
| ENSG00000197121 | PGAP1         | 1.990 | 0.003 | 2.087    | 2.006  | 0.010 | 2.130   | 1.008   |
| ENSG00000230061 | AP001065.2    | 1.971 | 0.046 | 0.596    | 2.285  | 0.032 | 0.737   | 0.263   |
| ENSG00000133019 | CHRM3         | 1.936 | 0.008 | 0.501    | 2.186  | 0.006 | 0.573   | 0.247   |
| ENSG00000174348 | PODN          | 1.935 | 0.002 | 1.844    | 2.075  | 0.003 | 1.962   | 0.940   |
| ENSG00000234035 | AP001044.2    | 1.934 | 0.073 | 0.558    | 2.460  | 0.024 | 0.756   | 0.204   |
| ENSG00000147889 | CDKN2A        | 1.919 | 0.006 | 0.359    | 2.225  | 0.002 | 0.411   | 0.177   |
| ENSG00000257839 | RP11-290L1.2  | 1.918 | 0.071 | 0.298    | 2.286  | 0.039 | 0.371   | 0.133   |
| ENSG00000197614 | MFAP5         | 1.916 | 0.022 | 0.901    | 2.439  | 0.004 | 1.190   | 0.442   |
| ENSG00000204839 | MROH6         | 1.906 | 0.001 | 8.009    | 2.091  | 0.001 | 8.813   | 4.194   |
| ENSG00000158292 | GPR153        | 1.878 | 0.001 | 15.247   | 2.019  | 0.001 | 16.173  | 8.215   |
| ENSG00000233271 | RP11-12C17.2  | 1.877 | 0.002 | 10.553   | 2.020  | 0.003 | 11.161  | 5.535   |
| ENSG00000143001 | TMEM61        | 1.872 | 0.001 | 8.420    | 2.014  | 0.001 | 8.908   | 4.475   |
| ENSG00000255970 | RP11-43N5.1   | 1.872 | 0.029 | 0.340    | 2.066  | 0.028 | 0.387   | 0.173   |
| ENSG00000112981 | NME5          | 1.840 | 0.043 | 0.341    | 2.088  | 0.032 | 0.394   | 0.169   |
| ENSG00000120471 | TP53AIP1      | 1.806 | 0.036 | 0.267    | 2.039  | 0.027 | 0.298   | 0.139   |
| ENSG00000178550 | AC010170.1    | 1.805 | 0.056 | 0.578    | 2.037  | 0.044 | 0.678   | 0.304   |
| ENSG00000236311 | TLX1NB        | 1.783 | 0.129 | 0.163    | 2.402  | 0.032 | 0.246   | 0.081   |
| ENSG00000197582 | GPX1P1        | 1.772 | 0.045 | 2.688    | 2.117  | 0.020 | 3.261   | 1.430   |
| ENSG00000101194 | SLC17A9       | 1.766 | 0.004 | 10.583   | 2.072  | 0.001 | 12.443  | 6.054   |
| ENSG00000049089 | COL9A2        | 1.764 | 0.006 | 3.098    | 2.178  | 0.000 | 3.903   | 1.744   |
| ENSG00000203727 | SAMD5         | 1.753 | 0.022 | 5.557    | 2.035  | 0.011 | 6.612   | 3.092   |

|                 |               |        |       |        |        |       |        |        |
|-----------------|---------------|--------|-------|--------|--------|-------|--------|--------|
| ENSG00000226754 | RP5-1024G6.5  | 1.738  | 0.032 | 0.598  | 2.077  | 0.009 | 0.708  | 0.320  |
| ENSG00000258793 | RP11-404P21.3 | 1.735  | 0.099 | 0.583  | 2.092  | 0.047 | 0.729  | 0.304  |
| ENSG00000256087 | ZNF432        | 1.730  | 0.012 | 5.181  | 2.105  | 0.002 | 6.390  | 2.996  |
| ENSG00000236085 | ACTG1P4       | 1.718  | 0.129 | 0.204  | 2.164  | 0.044 | 0.265  | 0.102  |
| ENSG00000227053 | RP11-395B7.4  | 1.707  | 0.068 | 38.656 | 2.340  | 0.007 | 54.079 | 21.470 |
| ENSG00000163295 | ALPI          | 1.640  | 0.086 | 8.483  | 2.237  | 0.009 | 12.003 | 4.996  |
| ENSG00000134321 | RSAD2         | 1.608  | 0.102 | 9.469  | 2.260  | 0.008 | 13.771 | 5.710  |
| ENSG00000197251 | LINC00336     | 1.604  | 0.181 | 0.239  | 2.650  | 0.005 | 0.443  | 0.139  |
| ENSG00000135638 | EMX1          | 1.597  | 0.212 | 0.340  | 2.313  | 0.033 | 0.561  | 0.190  |
| ENSG00000205277 | MUC12         | 1.556  | 0.115 | 24.840 | 2.005  | 0.024 | 32.596 | 15.733 |
| ENSG00000180438 | TPRXL         | 1.531  | 0.334 | 0.059  | 2.831  | 0.013 | 0.141  | 0.032  |
| ENSG00000156966 | B3GNT7        | 1.501  | 0.215 | 8.448  | 2.444  | 0.006 | 14.781 | 5.272  |
| ENSG00000164850 | GPER1         | 1.494  | 0.154 | 1.607  | 2.155  | 0.008 | 2.373  | 1.068  |
| ENSG00000229119 | CTB-63M22.1   | 1.479  | 0.230 | 2.090  | 2.065  | 0.032 | 3.057  | 1.336  |
| ENSG00000101443 | WFDC2         | 1.439  | 0.337 | 11.783 | 2.529  | 0.012 | 22.838 | 7.281  |
| ENSG00000211658 | IGLV3-27      | 1.209  | 0.674 | 8.497  | 2.218  | 0.047 | 20.021 | 6.909  |
| ENSG00000188404 | SELL          | 1.107  | 0.817 | 3.525  | -2.122 | 0.040 | 1.210  | 3.261  |
| ENSG00000111913 | FAM65B        | 1.081  | 0.840 | 1.575  | -2.039 | 0.022 | 0.634  | 1.513  |
| ENSG00000243008 | RP11-556N21.1 | 1.038  | 0.953 | 0.077  | 2.353  | 0.046 | 0.263  | 0.071  |
| ENSG00000183971 | NPW           | 1.029  | 0.961 | 0.228  | 2.255  | 0.039 | 0.641  | 0.225  |
| ENSG00000185105 | MYADML2       | 1.001  | 0.999 | 0.153  | 2.356  | 0.047 | 0.520  | 0.152  |
| ENSG00000112182 | BACH2         | -1.006 | 0.991 | 0.363  | -2.189 | 0.029 | 0.137  | 0.382  |
| ENSG0000007038  | PRSS21        | -1.021 | 0.971 | 0.615  | 2.747  | 0.005 | 2.263  | 0.652  |
| ENSG00000174123 | TLR10         | -1.091 | 0.838 | 1.205  | -2.049 | 0.042 | 0.552  | 1.398  |
| ENSG00000236682 | AC068282.3    | -1.103 | 0.785 | 0.489  | -2.029 | 0.023 | 0.234  | 0.579  |
| ENSG00000248334 | WHAMMP2       | -1.113 | 0.767 | 0.071  | -2.088 | 0.027 | 0.032  | 0.085  |
| ENSG00000188822 | CNR2          | -1.117 | 0.792 | 0.351  | -2.215 | 0.024 | 0.146  | 0.419  |
| ENSG00000163534 | FCRL1         | -1.126 | 0.821 | 1.107  | -2.427 | 0.039 | 0.340  | 1.384  |
| ENSG00000222037 | IGLC6         | -1.170 | 0.706 | 4.659  | -2.104 | 0.042 | 13.040 | 5.848  |
| ENSG00000144366 | GULP1         | -1.206 | 0.474 | 1.842  | -2.258 | 0.000 | 0.919  | 2.352  |
| ENSG00000117322 | CR2           | -1.226 | 0.685 | 2.773  | -2.632 | 0.024 | 0.787  | 3.962  |
| ENSG00000104921 | FCER2         | -1.324 | 0.481 | 1.686  | -2.382 | 0.021 | 0.728  | 2.496  |
| ENSG00000203710 | CR1           | -1.331 | 0.432 | 0.330  | -2.183 | 0.029 | 0.179  | 0.492  |
| ENSG00000012124 | CD22          | -1.393 | 0.387 | 5.258  | -2.343 | 0.024 | 1.740  | 5.566  |
| ENSG00000215428 | AL354898.1    | -1.408 | 0.332 | 2.704  | -2.140 | 0.035 | 1.572  | 4.355  |
| ENSG00000211951 | IGHV2-26      | -1.631 | 0.058 | 20.431 | -2.036 | 0.013 | 15.609 | 36.961 |
| ENSG00000138792 | ENPEP         | -1.716 | 0.079 | 0.291  | -2.050 | 0.040 | 0.227  | 0.568  |
| ENSG00000170579 | DLGAP1        | -1.726 | 0.045 | 0.038  | -2.042 | 0.025 | 0.031  | 0.074  |
| ENSG00000257335 | MGAM          | -1.747 | 0.020 | 0.199  | -2.095 | 0.006 | 0.162  | 0.388  |
| ENSG00000251468 | RP11-369K16.1 | -1.758 | 0.054 | 0.378  | -2.487 | 0.004 | 0.229  | 0.754  |
| ENSG00000118432 | CNR1          | -1.824 | 0.037 | 0.218  | -2.124 | 0.023 | 0.180  | 0.456  |
| ENSG00000127129 | EDN2          | -1.845 | 0.053 | 2.444  | -2.079 | 0.046 | 1.977  | 5.374  |
| ENSG00000173320 | STOX2         | -1.859 | 0.030 | 0.141  | -2.107 | 0.025 | 0.121  | 0.303  |
| ENSG00000143452 | HORMAD1       | -1.888 | 0.016 | 0.112  | -2.127 | 0.015 | 0.094  | 0.241  |
| ENSG00000152779 | SLC16A12      | -1.938 | 0.026 | 0.071  | -2.157 | 0.027 | 0.063  | 0.164  |
| ENSG00000248821 | AC009238.6    | -1.962 | 0.024 | 0.926  | -2.175 | 0.027 | 0.762  | 2.169  |
| ENSG00000181234 | TMEM132C      | -1.966 | 0.014 | 0.095  | -2.179 | 0.015 | 0.082  | 0.218  |
| ENSG00000187957 | DNER          | -1.984 | 0.058 | 0.052  | -2.337 | 0.040 | 0.039  | 0.144  |
| ENSG00000137819 | PAQR5         | -2.001 | 0.000 | 8.030  | -1.688 | 0.009 | 9.486  | 17.409 |
| ENSG00000213754 | RP11-284B18.3 | -2.003 | 0.019 | 0.138  | -1.088 | 0.878 | 0.282  | 0.329  |
| ENSG00000169760 | NLGN1         | -2.005 | 0.026 | 0.019  | -1.701 | 0.190 | 0.023  | 0.046  |
| ENSG00000152377 | SPOCK1        | -2.005 | 0.005 | 0.270  | -1.439 | 0.310 | 0.389  | 0.618  |
| ENSG00000135917 | SLC19A3       | -2.006 | 0.005 | 1.425  | -1.658 | 0.123 | 1.745  | 3.248  |
| ENSG00000156345 | CDK20         | -2.009 | 0.001 | 2.830  | -1.747 | 0.028 | 3.224  | 6.279  |
| ENSG00000243352 | RN7SL8P       | -2.010 | 0.021 | 8.290  | -2.087 | 0.041 | 7.712  | 20.435 |
| ENSG00000198157 | HMGNS         | -2.011 | 0.000 | 2.337  | -1.818 | 0.001 | 2.536  | 5.045  |
| ENSG00000119042 | SATB2         | -2.016 | 0.000 | 11.724 | -1.458 | 0.065 | 16.390 | 25.426 |
| ENSG00000259087 | RP11-356O9.2  | -2.017 | 0.011 | 1.186  | -1.002 | 0.998 | 2.675  | 2.822  |
| ENSG00000168447 | SCNN1B        | -2.017 | 0.030 | 10.889 | 1.086  | 0.897 | 28.290 | 27.303 |
| ENSG00000224223 | GS1-18A18.1   | -2.018 | 0.010 | 0.114  | -1.912 | 0.051 | 0.119  | 0.271  |
| ENSG00000176273 | SLC35G1       | -2.020 | 0.000 | 2.433  | -1.492 | 0.081 | 3.308  | 5.320  |
| ENSG00000120729 | MYOT          | -2.020 | 0.000 | 0.513  | -1.989 | 0.001 | 0.510  | 1.127  |
| ENSG00000241224 | RP11-59E19.1  | -2.020 | 0.000 | 4.187  | -1.946 | 0.002 | 4.307  | 9.289  |
| ENSG00000183134 | PTGDR2        | -2.024 | 0.000 | 2.776  | -1.470 | 0.110 | 3.799  | 6.170  |
| ENSG00000170419 | VSTM2A        | -2.026 | 0.001 | 0.901  | -1.506 | 0.186 | 1.233  | 2.041  |
| ENSG00000258021 | RP11-1100L3.4 | -2.028 | 0.020 | 0.228  | -1.178 | 0.744 | 0.446  | 0.561  |
| ENSG00000253445 | CTB-79E8.2    | -2.028 | 0.002 | 18.492 | -1.430 | 0.287 | 26.140 | 42.184 |
| ENSG00000178031 | ADAMTSL1      | -2.028 | 0.000 | 0.533  | -1.529 | 0.043 | 0.723  | 1.170  |
| ENSG00000198346 | ZNF813        | -2.030 | 0.000 | 0.626  | -1.347 | 0.155 | 0.948  | 1.363  |
| ENSG00000105784 | RUND3B        | -2.030 | 0.001 | 0.796  | -1.533 | 0.136 | 1.082  | 1.791  |
| ENSG00000123700 | KCNJ2         | -2.031 | 0.000 | 1.683  | -1.554 | 0.056 | 2.237  | 3.709  |
| ENSG00000132915 | PDE6A         | -2.032 | 0.030 | 0.944  | -1.675 | 0.238 | 1.153  | 2.393  |
| ENSG00000203414 | BTBD7P1       | -2.033 | 0.039 | 0.088  | -1.245 | 0.686 | 0.169  | 0.235  |
| ENSG00000182667 | NTM           | -2.035 | 0.001 | 0.150  | -1.561 | 0.108 | 0.199  | 0.340  |
| ENSG00000180787 | ZFP3          | -2.036 | 0.000 | 2.659  | -1.627 | 0.006 | 3.343  | 5.798  |

|                 |               |        |       |         |        |       |         |          |
|-----------------|---------------|--------|-------|---------|--------|-------|---------|----------|
| ENSG00000236021 | RP11-195C7.1  | -2.037 | 0.035 | 0.178   | -1.148 | 0.808 | 0.368   | 0.472    |
| ENSG00000225421 | ACO19330.1    | -2.038 | 0.032 | 0.373   | -2.230 | 0.039 | 0.312   | 0.958    |
| ENSG00000053108 | FSTL4         | -2.038 | 0.018 | 0.033   | -1.154 | 0.783 | 0.067   | 0.086    |
| ENSG00000164488 | DACT2         | -2.039 | 0.011 | 0.319   | -1.278 | 0.590 | 0.554   | 0.768    |
| ENSG00000145681 | HAPLN1        | -2.040 | 0.000 | 1.591   | -1.561 | 0.106 | 2.109   | 3.599    |
| ENSG00000107593 | PKD2L1        | -2.042 | 0.004 | 0.129   | -1.435 | 0.311 | 0.190   | 0.299    |
| ENSG00000197584 | KCNMB2        | -2.043 | 0.004 | 0.080   | -1.679 | 0.095 | 0.098   | 0.181    |
| ENSG00000173253 | DMRT2         | -2.044 | 0.011 | 0.544   | -1.884 | 0.068 | 0.568   | 1.299    |
| ENSG00000137872 | SEMA6D        | -2.045 | 0.000 | 4.108   | -1.750 | 0.019 | 4.838   | 9.226    |
| ENSG00000167107 | ACSF2         | -2.047 | 0.001 | 9.025   | -1.252 | 0.526 | 14.884  | 20.535   |
| ENSG00000158516 | CPA2          | -2.048 | 0.049 | 0.093   | -1.527 | 0.402 | 0.138   | 0.268    |
| ENSG00000180104 | EXOC3         | -2.050 | 0.002 | 38.563  | -1.768 | 0.054 | 44.042  | 89.814   |
| ENSG00000249087 | C1orf213      | -2.052 | 0.000 | 1.182   | -1.564 | 0.080 | 1.552   | 2.674    |
| ENSG00000189369 | GSPT2         | -2.052 | 0.000 | 2.750   | -1.764 | 0.002 | 3.204   | 6.118    |
| ENSG00000145147 | SLIT2         | -2.052 | 0.000 | 0.537   | -2.041 | 0.002 | 0.543   | 1.222    |
| ENSG00000108187 | PBLD          | -2.055 | 0.000 | 12.325  | -1.974 | 0.004 | 12.718  | 27.790   |
| ENSG00000223573 | TINCR         | -2.055 | 0.011 | 1.033   | -1.583 | 0.244 | 1.351   | 2.524    |
| ENSG00000211630 | IGKV1D-13     | -2.059 | 0.067 | 3.821   | -2.753 | 0.017 | 2.098   | 12.163   |
| ENSG00000162620 | LRRIQ3        | -2.060 | 0.015 | 0.028   | -1.213 | 0.692 | 0.055   | 0.073    |
| ENSG00000183049 | CAMK1D        | -2.061 | 0.000 | 3.553   | -1.415 | 0.157 | 5.277   | 7.934    |
| ENSG00000182271 | TMIGD1        | -2.062 | 0.011 | 32.992  | -1.714 | 0.154 | 39.387  | 80.524   |
| ENSG00000165323 | FAT3          | -2.062 | 0.015 | 0.012   | -1.845 | 0.099 | 0.013   | 0.029    |
| ENSG00000147588 | PMP2          | -2.063 | 0.017 | 0.101   | -1.371 | 0.489 | 0.165   | 0.254    |
| ENSG00000250376 | CTD-2005D20.1 | -2.065 | 0.020 | 0.314   | -1.901 | 0.097 | 0.348   | 0.828    |
| ENSG00000140557 | ST8SIA2       | -2.069 | 0.047 | 0.032   | -1.553 | 0.383 | 0.047   | 0.093    |
| ENSG00000006071 | ABCC8         | -2.070 | 0.000 | 0.125   | -1.508 | 0.130 | 0.175   | 0.289    |
| ENSG00000122254 | HS3ST2        | -2.071 | 0.027 | 0.129   | -1.747 | 0.195 | 0.152   | 0.334    |
| ENSG00000080493 | SLC4A4        | -2.071 | 0.000 | 19.914  | -1.570 | 0.080 | 26.706  | 45.264   |
| ENSG00000234362 | AC104654.2    | -2.072 | 0.047 | 0.084   | -1.153 | 0.820 | 0.192   | 0.249    |
| ENSG00000162461 | SLC25A34      | -2.074 | 0.001 | 3.450   | -1.390 | 0.309 | 5.168   | 8.037    |
| ENSG00000156113 | KCNMA1        | -2.077 | 0.000 | 1.356   | -1.565 | 0.028 | 1.809   | 3.044    |
| ENSG00000178163 | ZNF518B       | -2.077 | 0.000 | 0.840   | -1.953 | 0.001 | 0.882   | 1.895    |
| ENSG00000166183 | ASPG          | -2.079 | 0.029 | 1.274   | -1.160 | 0.805 | 2.482   | 3.404    |
| ENSG00000133116 | KL            | -2.079 | 0.000 | 0.204   | -1.486 | 0.123 | 0.292   | 0.470    |
| ENSG00000132321 | IQCA1         | -2.081 | 0.015 | 0.027   | -1.405 | 0.429 | 0.044   | 0.071    |
| ENSG00000180279 | CTD-2568A17.5 | -2.082 | 0.035 | 0.108   | -1.658 | 0.272 | 0.145   | 0.293    |
| ENSG00000237513 | RP11-325F22.2 | -2.083 | 0.001 | 0.805   | -1.595 | 0.092 | 1.074   | 1.880    |
| ENSG00000130054 | FAM155B       | -2.083 | 0.010 | 0.098   | -1.509 | 0.301 | 0.143   | 0.244    |
| ENSG00000078725 | BRINP1        | -2.087 | 0.048 | 0.018   | 1.120  | 0.863 | 0.067   | 0.060    |
| ENSG00000236581 | STAR13-AS     | -2.087 | 0.049 | 0.104   | -2.120 | 1.000 | 0.093   | 0.338    |
| ENSG00000250669 | RP11-83M16.3  | -2.087 | 0.016 | 0.351   | -1.714 | 0.173 | 0.445   | 0.910    |
| ENSG00000178171 | AMER3         | -2.088 | 0.037 | 0.016   | 1.084  | 0.902 | 0.050   | 0.047    |
| ENSG00000214359 | RPL18P10      | -2.089 | 0.049 | 0.130   | -1.573 | 1.000 | 0.210   | 0.419    |
| ENSG00000233377 | MTND4P20      | -2.094 | 0.015 | 3.575   | -1.987 | 0.066 | 3.772   | 9.231    |
| ENSG00000094963 | FMO2          | -2.095 | 0.018 | 0.042   | -1.757 | 0.163 | 0.052   | 0.111    |
| ENSG00000049130 | KITLG         | -2.097 | 0.000 | 5.449   | -1.782 | 0.007 | 6.454   | 12.454   |
| ENSG00000095777 | MYO3A         | -2.097 | 0.023 | 0.043   | -1.454 | 0.427 | 0.068   | 0.115    |
| ENSG00000159212 | CLIC6         | -2.098 | 0.004 | 2.470   | -1.945 | 0.035 | 2.629   | 6.046    |
| ENSG00000104267 | CA2           | -2.100 | 0.000 | 423.244 | -1.724 | 0.034 | 514.213 | 989.326  |
| ENSG00000258857 | RP11-247L20.3 | -2.102 | 0.017 | 0.271   | -1.330 | 0.540 | 0.502   | 0.725    |
| ENSG00000169704 | GP9           | -2.103 | 0.041 | 0.098   | -1.300 | 0.638 | 0.206   | 0.302    |
| ENSG00000232774 | RP11-47I22.3  | -2.104 | 0.022 | 0.049   | -1.202 | 0.727 | 0.098   | 0.132    |
| ENSG00000179542 | SLITRK4       | -2.105 | 0.007 | 0.030   | -1.953 | 0.048 | 0.033   | 0.078    |
| ENSG00000230929 | RP11-395C3.1  | -2.105 | 0.010 | 0.751   | -1.155 | 0.773 | 1.613   | 1.970    |
| ENSG00000103375 | AQP8          | -2.105 | 0.035 | 281.763 | -1.127 | 0.856 | 608.795 | 807.962  |
| ENSG00000177910 | SPATA31C2     | -2.106 | 0.043 | 0.021   | -1.537 | 1.000 | 0.034   | 0.064    |
| ENSG00000144136 | SLC20A1       | -2.107 | 0.000 | 39.719  | -2.267 | 0.000 | 36.090  | 93.378   |
| ENSG00000187140 | FOXD3         | -2.107 | 0.011 | 0.094   | -1.783 | 0.118 | 0.113   | 0.244    |
| ENSG00000197375 | SLC22A5       | -2.108 | 0.000 | 4.454   | -1.619 | 0.015 | 5.801   | 10.160   |
| ENSG00000142920 | ADC           | -2.108 | 0.000 | 1.150   | -1.535 | 0.121 | 1.566   | 2.687    |
| ENSG00000232358 | RP5-955M13.4  | -2.109 | 0.018 | 0.529   | -1.284 | 0.621 | 0.972   | 1.422    |
| ENSG00000188761 | BCL2L15       | -2.111 | 0.000 | 19.155  | -1.812 | 0.000 | 22.186  | 43.335   |
| ENSG00000251209 | LINC00923     | -2.111 | 0.031 | 0.026   | -1.345 | 0.573 | 0.049   | 0.076    |
| ENSG00000170099 | SERPINA6      | -2.116 | 0.005 | 0.845   | -1.166 | 0.751 | 1.611   | 2.098    |
| ENSG00000179520 | SLC17A8       | -2.118 | 0.011 | 0.208   | -1.811 | 0.115 | 0.250   | 0.538    |
| ENSG00000204099 | NEU4          | -2.118 | 0.007 | 3.877   | -1.253 | 0.630 | 6.929   | 9.664    |
| ENSG00000255402 | RP11-696P8.2  | -2.119 | 0.026 | 0.322   | -1.877 | 0.137 | 0.380   | 0.893    |
| ENSG00000152763 | WDR78         | -2.120 | 0.000 | 1.671   | -1.716 | 0.033 | 2.072   | 3.902    |
| ENSG00000123612 | ACVR1C        | -2.121 | 0.002 | 0.833   | -1.849 | 0.048 | 0.973   | 2.022    |
| ENSG00000253132 | IGHV3-62      | -2.123 | 0.019 | 0.788   | -1.295 | 0.609 | 1.403   | 2.107    |
| ENSG00000146530 | VWDE          | -2.123 | 0.012 | 0.086   | -1.626 | 0.235 | 0.115   | 0.223    |
| ENSG00000164100 | NDST3         | -2.125 | 0.002 | 0.053   | -1.974 | 0.018 | 0.056   | 0.130    |
| ENSG00000007306 | CEACAM7       | -2.126 | 0.001 | 499.297 | -1.844 | 0.036 | 575.505 | 1210.782 |
| ENSG00000148798 | INA           | -2.126 | 0.042 | 0.028   | -1.818 | 1.000 | 0.036   | 0.088    |
| ENSG00000123570 | RAB9B         | -2.126 | 0.000 | 0.285   | -1.498 | 0.054 | 0.412   | 0.665    |

|                 |               |        |       |         |        |       |         |         |
|-----------------|---------------|--------|-------|---------|--------|-------|---------|---------|
| ENSG00000180332 | KCTD4         | -2.126 | 0.020 | 0.314   | -2.128 | 0.052 | 0.293   | 0.861   |
| ENSG00000188897 | CTD-3088G3.8  | -2.128 | 0.017 | 0.083   | -1.604 | 0.276 | 0.119   | 0.220   |
| ENSG00000146281 | PM20D2        | -2.128 | 0.000 | 3.232   | -1.548 | 0.099 | 4.529   | 7.560   |
| ENSG00000258599 | RP11-84C10.1  | -2.128 | 0.015 | 0.117   | -1.758 | 0.160 | 0.145   | 0.312   |
| ENSG00000155846 | PPARGC1B      | -2.129 | 0.000 | 2.757   | -1.750 | 0.012 | 3.397   | 6.436   |
| ENSG00000112902 | SEMA5A        | -2.130 | 0.000 | 3.013   | -1.531 | 0.069 | 4.292   | 7.012   |
| ENSG00000186462 | NAP1L2        | -2.130 | 0.001 | 0.542   | -1.394 | 0.329 | 0.850   | 1.299   |
| ENSG00000173077 | 41974         | -2.130 | 0.029 | 0.024   | -1.688 | 0.252 | 0.033   | 0.070   |
| ENSG00000185432 | METTL7A       | -2.130 | 0.000 | 23.481  | -1.858 | 0.001 | 26.642  | 53.888  |
| ENSG00000173930 | SLCO4C1       | -2.133 | 0.018 | 0.305   | -2.294 | 0.026 | 0.268   | 0.820   |
| ENSG00000144057 | ST6GAL2       | -2.136 | 0.030 | 0.036   | -1.211 | 0.746 | 0.389   | 0.104   |
| ENSG00000189320 | FAM180A       | -2.137 | 0.023 | 0.064   | -1.385 | 0.509 | 0.112   | 0.179   |
| ENSG00000060047 | YBX2          | -2.138 | 0.001 | 12.370  | -1.374 | 0.364 | 19.455  | 29.968  |
| ENSG00000141434 | MEP1B         | -2.138 | 0.009 | 7.988   | -1.851 | 0.099 | 9.513   | 20.794  |
| ENSG00000230873 | STMND1        | -2.139 | 0.006 | 0.134   | -1.309 | 0.530 | 0.235   | 0.336   |
| ENSG00000256879 | RP11-284H19.1 | -2.139 | 0.020 | 0.992   | -1.580 | 0.315 | 1.454   | 2.711   |
| ENSG00000069018 | TRPC7         | -2.140 | 0.008 | 0.135   | -2.106 | 0.030 | 0.134   | 0.348   |
| ENSG00000147724 | FAM135B       | -2.140 | 0.000 | 0.203   | -1.229 | 0.559 | 0.364   | 0.483   |
| ENSG00000079689 | SCGN          | -2.141 | 0.003 | 1.474   | -1.147 | 0.773 | 2.843   | 3.689   |
| ENSG00000037965 | HOXC8         | -2.142 | 0.045 | 0.056   | -1.560 | 0.398 | 0.087   | 0.177   |
| ENSG00000183850 | ZNF730        | -2.142 | 0.025 | 0.042   | -1.293 | 0.626 | 0.085   | 0.124   |
| ENSG00000070193 | FGF10         | -2.144 | 0.007 | 0.096   | -2.093 | 0.030 | 0.097   | 0.247   |
| ENSG00000198650 | TAT           | -2.151 | 0.000 | 0.547   | -2.591 | 0.000 | 0.431   | 1.327   |
| ENSG00000198521 | ZNF43         | -2.157 | 0.000 | 1.059   | -1.451 | 0.187 | 1.630   | 2.535   |
| ENSG00000235142 | RP1-60O19.1   | -2.157 | 0.001 | 0.228   | -1.549 | 0.183 | 0.319   | 0.562   |
| ENSG00000225811 | RP11-54717.1  | -2.160 | 0.004 | 0.464   | -2.063 | 0.025 | 0.495   | 1.198   |
| ENSG00000222375 | RN7SKP127     | -2.160 | 0.045 | 2.530   | -1.214 | 0.766 | 5.723   | 8.668   |
| ENSG00000259459 | RP11-321G12.1 | -2.161 | 0.000 | 1.871   | -1.916 | 0.014 | 2.110   | 4.548   |
| ENSG00000179750 | APOBEC3B      | -2.163 | 0.005 | 4.950   | -1.354 | 0.484 | 8.253   | 12.655  |
| ENSG00000258735 | LINC00637     | -2.165 | 0.023 | 0.088   | -1.935 | 0.118 | 0.100   | 0.251   |
| ENSG00000172425 | TTC36         | -2.166 | 0.017 | 0.126   | -1.568 | 0.308 | 0.195   | 0.364   |
| ENSG00000249853 | HS3ST5        | -2.169 | 0.047 | 0.015   | -1.393 | 1.000 | 0.032   | 0.053   |
| ENSG00000171819 | ANGPTL7       | -2.169 | 0.016 | 0.176   | -1.936 | 0.101 | 0.189   | 0.487   |
| ENSG00000184719 | RNLS          | -2.171 | 0.000 | 1.368   | -1.558 | 0.056 | 1.904   | 3.238   |
| ENSG00000179314 | WSCD1         | -2.171 | 0.002 | 4.011   | -1.654 | 0.140 | 5.323   | 10.121  |
| ENSG00000176771 | NCKAP5        | -2.172 | 0.000 | 0.353   | -1.623 | 0.012 | 0.484   | 0.830   |
| ENSG00000176971 | FIBIN         | -2.172 | 0.000 | 0.311   | -1.443 | 0.205 | 0.484   | 0.753   |
| ENSG00000205189 | ZBTB10        | -2.173 | 0.000 | 1.352   | -1.495 | 0.112 | 2.002   | 3.207   |
| ENSG00000176399 | DMRTA1        | -2.175 | 0.008 | 0.544   | -1.659 | 0.205 | 0.751   | 1.463   |
| ENSG00000140527 | WDR93         | -2.176 | 0.005 | 0.123   | -1.691 | 0.154 | 0.166   | 0.325   |
| ENSG00000224413 | AP001476.2    | -2.176 | 0.018 | 0.059   | -1.392 | 0.495 | 0.108   | 0.180   |
| ENSG00000103184 | SEC14L5       | -2.176 | 0.005 | 0.143   | -1.801 | 0.099 | 0.174   | 0.372   |
| ENSG00000163873 | GRIK3         | -2.177 | 0.000 | 0.175   | -1.876 | 0.017 | 0.204   | 0.432   |
| ENSG00000134240 | HMGCS2        | -2.177 | 0.003 | 190.272 | -1.346 | 0.465 | 312.606 | 482.977 |
| ENSG00000178201 | VN1R1         | -2.178 | 0.001 | 0.223   | -1.897 | 0.024 | 0.257   | 0.562   |
| ENSG00000147852 | VLDLR         | -2.182 | 0.001 | 1.806   | -1.615 | 0.124 | 2.498   | 4.527   |
| ENSG00000258197 | NKX2-2-AS1    | -2.186 | 0.020 | 0.130   | -1.037 | 0.960 | 0.391   | 0.418   |
| ENSG00000237341 | SYP-AS1       | -2.186 | 0.017 | 0.233   | -1.520 | 0.357 | 0.379   | 0.683   |
| ENSG00000223353 | RP11-290P14.2 | -2.189 | 0.010 | 0.186   | -1.274 | 0.607 | 0.373   | 0.519   |
| ENSG00000166763 | STRCP1        | -2.189 | 0.001 | 0.056   | -1.026 | 0.962 | 0.130   | 0.139   |
| ENSG00000115841 | RMDN2         | -2.190 | 0.000 | 2.180   | -1.942 | 0.005 | 2.444   | 5.268   |
| ENSG00000256040 | PAPPA-AS1     | -2.190 | 0.001 | 0.359   | -1.504 | 0.203 | 0.546   | 0.903   |
| ENSG00000236404 | RP11-125B21.2 | -2.191 | 0.009 | 0.171   | -1.862 | 0.105 | 0.200   | 0.470   |
| ENSG00000118777 | ABCG2         | -2.191 | 0.001 | 14.165  | -1.521 | 0.224 | 21.074  | 35.944  |
| ENSG00000144810 | COL8A1        | -2.193 | 0.000 | 0.138   | -1.702 | 0.053 | 0.179   | 0.341   |
| ENSG00000153982 | GDPD1         | -2.197 | 0.000 | 0.826   | -1.782 | 0.001 | 1.014   | 1.957   |
| ENSG00000164128 | NPY1R         | -2.198 | 0.009 | 1.789   | -1.874 | 0.100 | 2.135   | 4.851   |
| ENSG00000218274 | RP3-407E4.3   | -2.201 | 0.034 | 0.065   | -1.358 | 0.590 | 0.142   | 0.229   |
| ENSG00000117519 | CNN3          | -2.205 | 0.000 | 21.436  | -1.666 | 0.000 | 28.414  | 50.286  |
| ENSG00000259426 | RP11-253M7.1  | -2.206 | 0.000 | 2.644   | -1.753 | 0.007 | 3.376   | 6.403   |
| ENSG00000135097 | MSI1          | -2.207 | 0.001 | 0.366   | -1.833 | 0.039 | 0.439   | 0.925   |
| ENSG00000134489 | HRH4          | -2.210 | 0.003 | 0.090   | -1.805 | 0.077 | 0.113   | 0.246   |
| ENSG00000164619 | BMPER         | -2.217 | 0.000 | 0.210   | -1.335 | 0.376 | 0.362   | 0.524   |
| ENSG00000138622 | HCN4          | -2.221 | 0.027 | 0.010   | -1.592 | 1.000 | 0.017   | 0.033   |
| ENSG00000230798 | RP4-792G4.2   | -2.223 | 0.015 | 0.078   | -2.007 | 0.083 | 0.086   | 0.243   |
| ENSG00000256643 | RP11-349K16.1 | -2.225 | 0.001 | 6.496   | -1.492 | 0.266 | 9.901   | 16.660  |
| ENSG00000135549 | PKIB          | -2.225 | 0.000 | 32.355  | -1.845 | 0.031 | 38.455  | 81.617  |
| ENSG00000130377 | ACSBG2        | -2.226 | 0.011 | 0.047   | -2.150 | 0.042 | 0.048   | 0.134   |
| ENSG00000137727 | ARHGAP20      | -2.229 | 0.000 | 0.478   | -2.203 | 0.003 | 0.482   | 1.221   |
| ENSG00000203859 | HSD3B2        | -2.229 | 0.040 | 3.501   | -2.574 | 0.030 | 2.256   | 13.157  |
| ENSG00000165478 | HEPACAM       | -2.235 | 0.019 | 0.032   | -2.197 | 0.053 | 0.030   | 0.097   |
| ENSG00000228630 | HOTAIR        | -2.236 | 0.025 | 0.043   | -2.165 | 0.072 | 0.044   | 0.134   |
| ENSG00000240654 | C1QTNF9       | -2.238 | 0.007 | 0.195   | -1.105 | 0.862 | 0.446   | 0.551   |
| ENSG00000006740 | ARHGAP44      | -2.240 | 0.000 | 7.697   | -1.509 | 0.095 | 11.661  | 18.882  |
| ENSG00000214357 | NEURL1B       | -2.241 | 0.000 | 10.989  | -1.663 | 0.053 | 14.859  | 27.490  |



|                 |                |        |       |         |        |       |         |         |
|-----------------|----------------|--------|-------|---------|--------|-------|---------|---------|
| ENSG00000229106 | RP11-4M23.2    | -2.248 | 0.043 | 0.032   | -1.628 | 1.000 | 0.062   | 0.135   |
| ENSG00000101746 | NOL4           | -2.249 | 0.005 | 0.061   | -1.719 | 0.153 | 0.084   | 0.170   |
| ENSG00000125820 | NKX2-2         | -2.253 | 0.004 | 0.094   | -1.090 | 0.871 | 0.235   | 0.268   |
| ENSG00000072133 | RPS6KA6        | -2.258 | 0.001 | 1.472   | -1.812 | 0.047 | 1.880   | 3.824   |
| ENSG00000230910 | RP3-525N10.2   | -2.258 | 0.032 | 0.086   | -2.212 | 1.000 | 0.082   | 0.335   |
| ENSG00000235501 | RP4-639F20.1   | -2.261 | 0.000 | 1.943   | -1.371 | 0.282 | 3.275   | 4.904   |
| ENSG00000039987 | BEST2          | -2.262 | 0.022 | 6.150   | -1.057 | 0.944 | 16.987  | 20.038  |
| ENSG00000170927 | PKHD1          | -2.263 | 0.012 | 0.048   | -2.825 | 0.004 | 0.033   | 0.142   |
| ENSG00000137561 | TTPA           | -2.264 | 0.000 | 1.453   | -1.492 | 0.170 | 2.304   | 3.681   |
| ENSG00000152785 | BMP3           | -2.264 | 0.020 | 2.579   | -1.648 | 0.308 | 3.928   | 8.157   |
| ENSG00000184349 | EFNA5          | -2.266 | 0.000 | 0.801   | -1.559 | 0.053 | 1.173   | 1.993   |
| ENSG00000214401 | KANSL1-AS1     | -2.268 | 0.004 | 2.878   | -1.299 | 0.570 | 5.393   | 7.974   |
| ENSG00000095209 | TMEM38B        | -2.268 | 0.000 | 2.972   | -1.729 | 0.008 | 3.926   | 7.306   |
| ENSG00000235335 | ACO16723.4     | -2.268 | 0.003 | 0.317   | -1.654 | 0.164 | 0.470   | 0.870   |
| ENSG00000183690 | EFHC2          | -2.269 | 0.000 | 0.482   | -1.928 | 0.005 | 0.569   | 1.221   |
| ENSG00000257023 | RP11-268P4.4   | -2.269 | 0.029 | 0.202   | -2.421 | 0.041 | 0.160   | 0.755   |
| ENSG00000256193 | LINC00507      | -2.270 | 0.009 | 0.109   | -1.562 | 0.311 | 0.180   | 0.327   |
| ENSG00000066230 | SLC9A3         | -2.271 | 0.001 | 105.779 | -2.256 | 0.006 | 107.250 | 285.593 |
| ENSG00000234828 | RP11-526A4.1   | -2.284 | 0.002 | 0.162   | -1.799 | 0.078 | 0.211   | 0.434   |
| ENSG00000151338 | MIPOL1         | -2.287 | 0.000 | 0.507   | -1.876 | 0.008 | 0.623   | 1.281   |
| ENSG00000181741 | FDX1P1         | -2.290 | 0.039 | 0.010   | -1.413 | 1.000 | 0.078   | 0.156   |
| ENSG00000256612 | CYP2B7P        | -2.292 | 0.003 | 2.647   | -1.957 | 0.058 | 3.147   | 7.429   |
| ENSG00000109182 | CWH43          | -2.297 | 0.012 | 5.416   | -1.440 | 0.467 | 9.528   | 16.527  |
| ENSG00000185038 | MROH2A         | -2.302 | 0.011 | 0.039   | -1.909 | 0.118 | 0.053   | 0.122   |
| ENSG00000134955 | SLC37A2        | -2.303 | 0.038 | 22.010  | -1.985 | 0.168 | 26.957  | 108.645 |
| ENSG00000168243 | GNG4           | -2.306 | 0.010 | 0.281   | -1.734 | 0.212 | 0.379   | 0.849   |
| ENSG00000185985 | SLITRK2        | -2.308 | 0.005 | 0.027   | -1.726 | 0.168 | 0.039   | 0.080   |
| ENSG00000100146 | SOX10          | -2.309 | 0.000 | 0.360   | -1.526 | 0.181 | 0.562   | 0.958   |
| ENSG00000167768 | KRT1           | -2.311 | 0.029 | 0.193   | -1.314 | 0.654 | 0.449   | 0.776   |
| ENSG00000215325 | ASS1P10        | -2.312 | 0.022 | 0.053   | -1.154 | 0.822 | 0.158   | 0.202   |
| ENSG00000225782 | RP11-322F10.2  | -2.313 | 0.000 | 0.662   | -1.905 | 0.029 | 0.840   | 1.814   |
| ENSG00000256674 | RP11-172C16.4  | -2.315 | 0.004 | 0.126   | -1.650 | 0.203 | 0.197   | 0.377   |
| ENSG00000161905 | ALOX15         | -2.319 | 0.004 | 1.058   | -1.855 | 0.104 | 1.395   | 3.065   |
| ENSG00000233878 | ACO73133.1     | -2.320 | 0.000 | 0.257   | -1.870 | 0.024 | 0.319   | 0.675   |
| ENSG00000113249 | HAVCR1         | -2.322 | 0.021 | 0.700   | -1.938 | 0.155 | 0.916   | 2.399   |
| ENSG00000254319 | RP11-134O21.1  | -2.326 | 0.014 | 0.111   | -1.346 | 0.579 | 0.237   | 0.370   |
| ENSG00000144278 | GALNT13        | -2.326 | 0.020 | 0.012   | -1.164 | 0.808 | 0.036   | 0.044   |
| ENSG00000203401 | AC009061.1     | -2.327 | 0.000 | 18.724  | -1.723 | 0.031 | 25.608  | 48.614  |
| ENSG00000254533 | AF186192.1     | -2.329 | 0.017 | 0.121   | -2.092 | 1.000 | 0.132   | 0.420   |
| ENSG00000213630 | RP11-772E11.1  | -2.331 | 0.002 | 0.835   | -1.487 | 0.308 | 1.463   | 2.432   |
| ENSG00000166869 | CHP2           | -2.334 | 0.001 | 64.821  | -1.577 | 0.214 | 97.501  | 179.470 |
| ENSG00000203867 | RBM20          | -2.346 | 0.000 | 0.083   | -1.565 | 0.132 | 0.132   | 0.224   |
| ENSG00000095627 | TDRD1          | -2.349 | 0.030 | 0.163   | -1.288 | 0.688 | 0.044   | 0.066   |
| ENSG00000102837 | OLFM4          | -2.352 | 0.004 | 149.175 | -2.063 | 0.049 | 169.866 | 444.269 |
| ENSG00000132854 | KANK4          | -2.353 | 0.004 | 0.142   | -1.654 | 0.219 | 0.218   | 0.425   |
| ENSG00000203858 | HSD3BP2        | -2.355 | 0.023 | 0.208   | -2.645 | 0.022 | 0.156   | 0.816   |
| ENSG00000250252 | RP11-342A1.1   | -2.360 | 0.023 | 0.088   | -2.028 | 1.000 | 0.110   | 0.353   |
| ENSG00000171208 | NETO2          | -2.360 | 0.000 | 4.680   | -2.125 | 0.010 | 5.231   | 12.861  |
| ENSG00000254645 | RP11-396O20.2  | -2.361 | 0.008 | 4.800   | -1.963 | 0.099 | 5.811   | 14.921  |
| ENSG00000251015 | SLC25A30-AS1   | -2.362 | 0.005 | 0.187   | -1.256 | 0.635 | 0.417   | 0.576   |
| ENSG00000140093 | SERPINA10      | -2.362 | 0.003 | 0.081   | -1.611 | 0.223 | 0.131   | 0.238   |
| ENSG00000135083 | CCNJL          | -2.366 | 0.000 | 3.227   | -1.496 | 0.152 | 5.174   | 8.514   |
| ENSG00000142609 | C1orf222       | -2.367 | 0.028 | 0.008   | -1.874 | 1.000 | 0.012   | 0.035   |
| ENSG00000197134 | ZNF257         | -2.368 | 0.007 | 0.187   | -2.532 | 0.012 | 0.162   | 0.585   |
| ENSG00000164270 | HTR4           | -2.370 | 0.009 | 0.441   | -2.186 | 0.050 | 0.480   | 1.404   |
| ENSG00000155850 | SLC26A2        | -2.371 | 0.006 | 88.685  | -1.877 | 0.122 | 116.279 | 271.554 |
| ENSG00000188242 | CTD-2228K2.5   | -2.372 | 0.002 | 139.121 | -2.033 | 0.042 | 160.290 | 406.716 |
| ENSG00000224459 | RP11-169K16.4  | -2.373 | 0.000 | 1.489   | -1.759 | 0.044 | 2.052   | 4.062   |
| ENSG00000150054 | MPP7           | -2.374 | 0.000 | 4.291   | -2.055 | 0.000 | 4.996   | 11.108  |
| ENSG00000156968 | MPV17L         | -2.377 | 0.000 | 1.153   | -1.508 | 0.050 | 1.827   | 2.998   |
| ENSG00000144355 | DLX1           | -2.378 | 0.021 | 0.013   | -1.297 | 1.000 | 0.041   | 0.061   |
| ENSG00000111863 | ADTRP          | -2.379 | 0.000 | 17.562  | -1.599 | 0.139 | 26.472  | 47.718  |
| ENSG00000177398 | UMODL1         | -2.384 | 0.001 | 0.037   | -1.374 | 0.408 | 0.072   | 0.110   |
| ENSG00000234460 | :Xyac-YM21GA2. | -2.385 | 0.004 | 0.517   | -2.175 | 0.034 | 0.578   | 1.612   |
| ENSG00000164093 | PITX2          | -2.388 | 0.016 | 4.830   | -2.089 | 0.099 | 5.554   | 17.506  |
| ENSG00000155966 | AFF2           | -2.394 | 0.016 | 0.050   | -2.406 | 0.039 | 0.022   | 0.079   |
| ENSG00000108018 | SORCS1         | -2.395 | 0.008 | 0.110   | -2.208 | 0.046 | 0.123   | 0.355   |
| ENSG00000144619 | CNTN4          | -2.396 | 0.000 | 0.766   | -2.003 | 0.000 | 0.925   | 2.001   |
| ENSG00000113805 | CNTN3          | -2.396 | 0.000 | 1.202   | -1.928 | 0.024 | 1.532   | 3.318   |
| ENSG00000019991 | HGF            | -2.396 | 0.000 | 0.272   | -1.767 | 0.020 | 0.375   | 0.729   |
| ENSG00000229941 | ACO12499.1     | -2.397 | 0.007 | 0.267   | -2.852 | 0.004 | 0.194   | 0.863   |
| ENSG00000101098 | RIMS4          | -2.397 | 0.008 | 0.082   | -1.150 | 0.818 | 0.215   | 0.273   |
| ENSG00000139352 | ASCL1          | -2.400 | 0.005 | 0.067   | -1.348 | 0.534 | 0.142   | 0.209   |
| ENSG00000148942 | SLC5A12        | -2.403 | 0.004 | 0.036   | -1.536 | 0.319 | 0.062   | 0.112   |
| ENSG00000211633 | IGKV1D-42      | -2.403 | 0.014 | 0.416   | -1.750 | 0.240 | 0.688   | 1.530   |

|                 |               |        |       |         |        |       |         |          |
|-----------------|---------------|--------|-------|---------|--------|-------|---------|----------|
| ENSG00000102003 | SYP           | -2.404 | 0.000 | 0.781   | -1.521 | 0.069 | 1.227   | 2.068    |
| ENSG00000164129 | NPY5R         | -2.406 | 0.013 | 0.130   | -2.017 | 0.114 | 0.164   | 0.463    |
| ENSG00000112232 | KHDRBS2       | -2.406 | 0.001 | 0.189   | -3.146 | 0.000 | 0.129   | 0.557    |
| ENSG00000104059 | FAM189A1      | -2.410 | 0.000 | 1.144   | -1.488 | 0.123 | 1.891   | 3.058    |
| ENSG00000225329 | RP11-325F22.5 | -2.410 | 0.002 | 8.539   | -2.405 | 0.008 | 8.299   | 25.729   |
| ENSG00000189037 | DUSP21        | -2.413 | 0.024 | 0.180   | -2.319 | 0.067 | 0.172   | 0.863    |
| ENSG00000231181 | RP13-15M17.1  | -2.414 | 0.000 | 0.605   | -2.207 | 0.008 | 0.678   | 1.729    |
| ENSG00000122756 | CNTFR         | -2.419 | 0.004 | 3.891   | -2.051 | 0.058 | 4.506   | 12.131   |
| ENSG00000089199 | CHGB          | -2.420 | 0.005 | 1.909   | -1.768 | 0.178 | 2.608   | 6.106    |
| ENSG00000163959 | SLC51A        | -2.424 | 0.002 | 8.791   | -2.180 | 0.022 | 9.475   | 26.332   |
| ENSG00000164199 | GPR98         | -2.425 | 0.000 | 0.071   | -2.113 | 0.000 | 0.082   | 0.192    |
| ENSG00000225953 | SATB2-AS1     | -2.426 | 0.000 | 5.832   | -1.608 | 0.162 | 9.086   | 16.503   |
| ENSG00000172986 | GXYLT2        | -2.429 | 0.000 | 1.280   | -2.017 | 0.001 | 1.554   | 3.464    |
| ENSG00000214381 | LINC00488     | -2.431 | 0.014 | 0.072   | -2.330 | 0.048 | 0.073   | 0.270    |
| ENSG00000259457 | RP11-279F6.2  | -2.432 | 0.002 | 0.264   | -1.767 | 0.132 | 0.382   | 0.812    |
| ENSG00000170482 | SLC23A1       | -2.436 | 0.000 | 1.141   | -1.606 | 0.146 | 1.772   | 3.221    |
| ENSG00000229676 | ZNF492        | -2.438 | 0.006 | 0.034   | -1.247 | 0.681 | 0.086   | 0.114    |
| ENSG00000224984 | RP11-524H19.2 | -2.449 | 0.000 | 1.179   | -1.941 | 0.005 | 1.517   | 3.257    |
| ENSG00000203685 | C1orf95       | -2.452 | 0.000 | 0.247   | -2.306 | 0.003 | 0.265   | 0.715    |
| ENSG00000175161 | CADM2         | -2.455 | 0.006 | 0.042   | -1.494 | 0.396 | 0.082   | 0.142    |
| ENSG00000111339 | ART4          | -2.457 | 0.022 | 0.004   | -1.337 | 1.000 | 0.016   | 0.028    |
| ENSG00000146013 | GFRA3         | -2.458 | 0.000 | 0.385   | -1.588 | 0.132 | 0.614   | 1.111    |
| ENSG00000141431 | ASXL3         | -2.460 | 0.000 | 0.310   | -1.888 | 0.045 | 0.415   | 0.908    |
| ENSG00000256948 | RP11-598F7.3  | -2.464 | 0.021 | 0.045   | -1.332 | 1.000 | 0.175   | 0.275    |
| ENSG00000240875 | LINC00886     | -2.465 | 0.000 | 0.265   | -1.641 | 0.129 | 0.406   | 0.767    |
| ENSG00000131126 | TEX101        | -2.469 | 0.004 | 0.397   | -1.787 | 0.170 | 0.571   | 1.302    |
| ENSG0000012504  | NR1H4         | -2.473 | 0.000 | 3.693   | -2.509 | 0.002 | 3.507   | 11.018   |
| ENSG00000237227 | RP5-1155K23.4 | -2.473 | 0.015 | 0.225   | -1.933 | 0.165 | 0.329   | 0.953    |
| ENSG00000073711 | PPP2R3A       | -2.473 | 0.000 | 1.679   | -1.815 | 0.006 | 2.327   | 4.597    |
| ENSG00000138669 | PRKG2         | -2.480 | 0.003 | 0.717   | -1.292 | 0.613 | 1.617   | 2.281    |
| ENSG00000181778 | TMEM252       | -2.480 | 0.006 | 0.333   | -2.144 | 0.057 | 0.404   | 1.144    |
| ENSG00000149516 | MS4A3         | -2.482 | 0.020 | 0.010   | -2.227 | 1.000 | 0.012   | 0.093    |
| ENSG00000245750 | RP11-279F6.1  | -2.483 | 0.000 | 0.576   | -1.850 | 0.024 | 0.780   | 1.642    |
| ENSG00000109819 | PPARGC1A      | -2.483 | 0.000 | 1.728   | -1.822 | 0.011 | 2.371   | 4.768    |
| ENSG00000246228 | CASC8         | -2.485 | 0.018 | 0.205   | -1.577 | 0.405 | 0.435   | 0.958    |
| ENSG00000036672 | USP2          | -2.490 | 0.000 | 3.952   | -1.903 | 0.048 | 5.117   | 11.893   |
| ENSG00000147257 | GPC3          | -2.493 | 0.014 | 1.923   | -1.887 | 0.193 | 2.877   | 8.312    |
| ENSG00000184368 | MAP7D2        | -2.499 | 0.000 | 0.213   | -2.214 | 0.002 | 0.241   | 0.625    |
| ENSG00000146950 | SHROOM2       | -2.501 | 0.000 | 0.498   | -1.892 | 0.054 | 0.666   | 1.509    |
| ENSG00000105825 | TFPI2         | -2.507 | 0.014 | 0.441   | -1.531 | 0.438 | 0.945   | 1.988    |
| ENSG00000145864 | GABRB2        | -2.516 | 0.001 | 0.089   | -1.331 | 0.522 | 0.192   | 0.279    |
| ENSG00000154654 | NCAM2         | -2.520 | 0.000 | 0.038   | -1.808 | 0.039 | 0.055   | 0.115    |
| ENSG00000125851 | PCSK2         | -2.530 | 0.001 | 0.130   | -1.814 | 0.109 | 0.189   | 0.417    |
| ENSG00000238243 | OR2W3         | -2.537 | 0.000 | 0.263   | -1.382 | 0.423 | 0.531   | 0.840    |
| ENSG00000113073 | SLC4A9        | -2.539 | 0.001 | 0.068   | -1.298 | 0.536 | 0.150   | 0.218    |
| ENSG00000246090 | RP11-696N14.1 | -2.540 | 0.000 | 0.534   | -2.048 | 0.001 | 0.674   | 1.500    |
| ENSG00000169918 | OTUD7A        | -2.546 | 0.000 | 0.176   | -1.929 | 0.005 | 0.238   | 0.517    |
| ENSG00000108381 | ASPA          | -2.558 | 0.000 | 0.652   | -1.953 | 0.013 | 0.869   | 1.910    |
| ENSG00000228307 | OR2S1P        | -2.563 | 0.000 | 0.480   | -1.788 | 0.059 | 0.710   | 1.476    |
| ENSG00000235026 | DPP10-AS1     | -2.565 | 0.001 | 1.472   | -1.665 | 0.219 | 2.350   | 4.894    |
| ENSG00000187416 | LHFPL3        | -2.572 | 0.001 | 0.957   | -2.617 | 0.004 | 0.906   | 3.149    |
| ENSG00000158813 | EDA           | -2.576 | 0.000 | 0.360   | -1.688 | 0.084 | 0.576   | 1.076    |
| ENSG00000185634 | SHC4          | -2.578 | 0.000 | 0.036   | -1.892 | 0.033 | 0.051   | 0.108    |
| ENSG00000150893 | FREM2         | -2.590 | 0.000 | 0.045   | -2.149 | 0.014 | 0.056   | 0.142    |
| ENSG00000162761 | LMX1A         | -2.600 | 0.000 | 0.055   | -1.587 | 0.209 | 0.100   | 0.181    |
| ENSG00000124615 | MOCS1         | -2.609 | 0.000 | 3.045   | -1.701 | 0.064 | 4.701   | 9.140    |
| ENSG00000082397 | EPB41L3       | -2.622 | 0.000 | 5.843   | -2.022 | 0.002 | 7.707   | 17.290   |
| ENSG00000123560 | PLP1          | -2.641 | 0.000 | 0.788   | -1.914 | 0.014 | 1.094   | 2.389    |
| ENSG00000172572 | PDE3A         | -2.644 | 0.000 | 2.516   | -1.561 | 0.154 | 4.473   | 7.674    |
| ENSG00000224968 | RP1-35C21.1   | -2.645 | 0.000 | 1.327   | -2.111 | 0.030 | 1.680   | 4.447    |
| ENSG00000136546 | SCN7A         | -2.647 | 0.000 | 0.401   | -1.898 | 0.025 | 0.578   | 1.239    |
| ENSG00000249948 | GBA3          | -2.650 | 0.000 | 5.331   | -2.629 | 0.002 | 5.167   | 17.692   |
| ENSG00000233215 | AP000472.2    | -2.654 | 0.004 | 0.361   | -2.375 | 0.031 | 0.413   | 1.383    |
| ENSG00000181374 | CCL13         | -2.658 | 0.000 | 10.789  | -1.348 | 0.508 | 23.330  | 35.919   |
| ENSG00000152078 | TMEM56        | -2.666 | 0.000 | 6.353   | -1.895 | 0.020 | 9.196   | 19.582   |
| ENSG00000164651 | SP8           | -2.701 | 0.005 | 0.007   | -2.851 | 1.000 | 0.004   | 0.086    |
| ENSG00000248144 | ADH1C         | -2.714 | 0.001 | 86.267  | -1.706 | 0.198 | 146.771 | 306.425  |
| ENSG00000016490 | CLCA1         | -2.724 | 0.000 | 302.829 | -1.605 | 0.242 | 564.263 | 1040.477 |
| ENSG00000169385 | RNASE2        | -2.726 | 0.003 | 0.178   | -1.637 | 0.307 | 0.382   | 0.795    |
| ENSG00000139163 | ETNK1         | -2.754 | 0.000 | 32.474  | -2.916 | 0.000 | 29.810  | 104.764  |
| ENSG00000179915 | NRXN1         | -2.760 | 0.000 | 0.112   | -1.752 | 0.037 | 0.181   | 0.355    |
| ENSG00000256518 | RP11-807H22.5 | -2.761 | 0.007 | 1.159   | -2.239 | 0.079 | 1.448   | 6.355    |
| ENSG00000175600 | SUGCT         | -2.766 | 0.000 | 1.029   | -1.712 | 0.185 | 1.768   | 3.713    |
| ENSG00000236330 | RPL5P9        | -2.768 | 0.008 | 0.015   | -1.876 | 1.000 | 0.051   | 0.155    |
| ENSG00000116183 | PAPPA2        | -2.773 | 0.004 | 0.076   | 1.100  | 0.894 | 0.372   | 0.356    |

|                 |               |        |       |         |        |       |         |         |
|-----------------|---------------|--------|-------|---------|--------|-------|---------|---------|
| ENSG00000187758 | ADH1A         | -2.797 | 0.000 | 0.113   | -1.469 | 0.268 | 0.241   | 0.393   |
| ENSG00000134042 | MRO           | -2.798 | 0.000 | 0.051   | -1.669 | 0.070 | 0.094   | 0.172   |
| ENSG00000152092 | ASTN1         | -2.800 | 0.003 | 0.014   | -2.372 | 0.035 | 0.018   | 0.062   |
| ENSG00000170500 | LONRF2        | -2.804 | 0.002 | 0.027   | -2.163 | 0.056 | 0.038   | 0.109   |
| ENSG00000071991 | CDH19         | -2.814 | 0.000 | 0.195   | -1.800 | 0.065 | 0.322   | 0.654   |
| ENSG00000176884 | GRIN1         | -2.818 | 0.000 | 1.116   | -2.240 | 0.002 | 1.425   | 3.690   |
| ENSG00000172478 | C2orf54       | -2.818 | 0.000 | 1.329   | -2.102 | 0.035 | 1.825   | 4.806   |
| ENSG00000256870 | SLC5A8        | -2.819 | 0.004 | 0.010   | -1.248 | 0.710 | 0.045   | 0.062   |
| ENSG00000180616 | SSTR2         | -2.821 | 0.000 | 0.304   | -1.354 | 0.500 | 0.721   | 1.103   |
| ENSG00000165794 | SLC39A2       | -2.826 | 0.000 | 0.454   | -1.621 | 0.207 | 0.857   | 1.636   |
| ENSG00000179914 | ITLN1         | -2.828 | 0.000 | 163.469 | -2.104 | 0.018 | 222.519 | 559.283 |
| ENSG00000129167 | TPH1          | -2.835 | 0.000 | 1.328   | -1.850 | 0.069 | 2.070   | 4.632   |
| ENSG00000171303 | KCNK3         | -2.837 | 0.000 | 0.090   | -1.620 | 0.080 | 0.166   | 0.303   |
| ENSG00000182103 | FAM181B       | -2.837 | 0.001 | 0.097   | -1.678 | 0.210 | 0.193   | 0.390   |
| ENSG00000253818 | IGLV1-41      | -2.845 | 0.005 | 1.140   | -1.309 | 0.661 | 7.166   | 17.060  |
| ENSG00000072041 | SLC6A15       | -2.863 | 0.006 | 0.002   | -1.156 | 1.000 | 0.018   | 0.023   |
| ENSG00000250385 | RP11-310P5.2  | -2.865 | 0.002 | 0.762   | -2.361 | 0.036 | 0.963   | 3.424   |
| ENSG00000237515 | SHISA9        | -2.868 | 0.001 | 0.042   | -2.173 | 0.053 | 0.059   | 0.179   |
| ENSG00000196482 | ESRRG         | -2.869 | 0.001 | 0.079   | -1.970 | 0.095 | 0.125   | 0.320   |
| ENSG00000135220 | UGT2A3        | -2.875 | 0.000 | 12.447  | -1.993 | 0.070 | 19.246  | 47.324  |
| ENSG00000128383 | APOBEC3A      | -2.891 | 0.001 | 0.436   | -1.733 | 0.221 | 0.823   | 1.834   |
| ENSG00000139209 | SLC38A4       | -2.895 | 0.001 | 2.375   | -2.226 | 0.044 | 3.286   | 9.766   |
| ENSG00000167080 | B4GALNT2      | -2.898 | 0.001 | 18.781  | -2.607 | 0.009 | 21.087  | 76.818  |
| ENSG00000129204 | USP6          | -2.900 | 0.000 | 0.042   | 1.078  | 0.904 | 0.174   | 0.170   |
| ENSG00000084710 | EFR3B         | -2.908 | 0.000 | 0.078   | -2.335 | 0.003 | 0.102   | 0.279   |
| ENSG00000111846 | GCNT2         | -2.925 | 0.000 | 1.491   | -2.271 | 0.004 | 1.913   | 5.235   |
| ENSG00000218265 | RPS4XP7       | -2.925 | 0.000 | 0.658   | -2.024 | 0.017 | 0.994   | 2.358   |
| ENSG00000183454 | GRIN2A        | -2.930 | 0.000 | 0.071   | -1.639 | 0.101 | 0.137   | 0.248   |
| ENSG00000231824 | C18orf42      | -2.945 | 0.003 | 0.018   | -1.745 | 1.000 | 0.049   | 0.113   |
| ENSG00000251331 | RP11-689K5.3  | -2.946 | 0.000 | 0.285   | -2.371 | 0.016 | 0.374   | 1.142   |
| ENSG00000116141 | MARK1         | -2.949 | 0.000 | 0.326   | -2.013 | 0.006 | 0.498   | 1.122   |
| ENSG00000237159 | CNTFR-AS1     | -2.962 | 0.002 | 0.114   | -2.383 | 0.038 | 0.156   | 0.554   |
| ENSG00000135298 | BAI3          | -2.963 | 0.000 | 0.049   | -1.970 | 0.028 | 0.080   | 0.183   |
| ENSG00000175497 | DPP10         | -2.963 | 0.000 | 0.283   | -2.135 | 0.019 | 0.406   | 1.050   |
| ENSG00000169083 | AR            | -2.966 | 0.000 | 0.097   | -3.154 | 0.000 | 0.086   | 0.364   |
| ENSG00000137975 | CLCA2         | -2.980 | 0.000 | 0.264   | -2.342 | 0.005 | 0.346   | 0.973   |
| ENSG00000251632 | RP11-714L20.1 | -2.989 | 0.002 | 0.033   | -1.511 | 0.423 | 0.099   | 0.184   |
| ENSG00000236333 | TRHDE-AS1     | -3.008 | 0.000 | 0.013   | -2.179 | 0.043 | 0.019   | 0.055   |
| ENSG00000183117 | CSMD1         | -3.011 | 0.000 | 0.012   | -1.382 | 0.496 | 0.034   | 0.051   |
| ENSG00000111052 | LIN7A         | -3.012 | 0.000 | 0.237   | -2.817 | 0.000 | 0.245   | 0.846   |
| ENSG00000050030 | KIAA2022      | -3.029 | 0.000 | 0.055   | -1.829 | 0.072 | 0.098   | 0.208   |
| ENSG00000254695 | RP11-396O20.1 | -3.058 | 0.000 | 0.598   | -3.836 | 0.000 | 0.436   | 2.334   |
| ENSG00000258918 | RP11-219E7.4  | -3.074 | 0.001 | 0.322   | -1.929 | 0.146 | 0.635   | 1.764   |
| ENSG00000107105 | ELAVL2        | -3.088 | 0.000 | 0.052   | -1.580 | 0.212 | 0.121   | 0.212   |
| ENSG00000166828 | SCNN1G        | -3.101 | 0.001 | 0.161   | 1.044  | 0.959 | 0.869   | 0.874   |
| ENSG00000104332 | SFRP1         | -3.108 | 0.000 | 0.612   | -1.721 | 0.178 | 1.274   | 2.576   |
| ENSG00000162992 | NEUROD1       | -3.176 | 0.000 | 0.308   | -1.947 | 0.046 | 0.527   | 1.237   |
| ENSG00000121207 | LRAT          | -3.192 | 0.001 | 0.007   | -1.622 | 0.349 | 0.022   | 0.046   |
| ENSG00000064655 | EYA2          | -3.207 | 0.000 | 1.890   | -1.774 | 0.127 | 3.708   | 7.922   |
| ENSG00000196090 | PTPRT         | -3.212 | 0.000 | 0.031   | -1.546 | 0.313 | 0.079   | 0.138   |
| ENSG00000157703 | SVOPL         | -3.236 | 0.000 | 0.154   | -2.013 | 0.086 | 0.275   | 0.751   |
| ENSG00000106278 | PTPRZ1        | -3.241 | 0.000 | 0.043   | -1.903 | 0.050 | 0.081   | 0.178   |
| ENSG00000101850 | GPR143        | -3.283 | 0.000 | 0.199   | -2.334 | 0.002 | 0.294   | 0.824   |
| ENSG00000123496 | IL13RA2       | -3.289 | 0.000 | 0.237   | -2.466 | 0.029 | 0.344   | 1.361   |
| ENSG00000258483 | AC144835.1    | -3.390 | 0.000 | 0.495   | -3.673 | 0.000 | 0.368   | 2.965   |
| ENSG00000196660 | SLC30A10      | -3.445 | 0.000 | 2.365   | -2.630 | 0.007 | 3.260   | 11.982  |
| ENSG00000178568 | ERBB4         | -3.554 | 0.001 | 0.006   | -2.614 | 0.028 | 0.010   | 0.102   |
| ENSG00000156486 | KCNS2         | -3.560 | 0.000 | 0.040   | -1.993 | 0.074 | 0.090   | 0.220   |
| ENSG00000239783 | RP5-1050K3.3  | -3.561 | 0.000 | 0.233   | -1.898 | 0.116 | 0.614   | 1.421   |
| ENSG00000137142 | IGFBPL1       | -3.564 | 0.000 | 0.072   | -2.345 | 0.034 | 0.146   | 0.473   |
| ENSG00000162722 | TRIM58        | -3.595 | 0.000 | 0.356   | -2.059 | 0.038 | 0.694   | 1.725   |
| ENSG00000144290 | SLC4A10       | -3.606 | 0.000 | 0.532   | -3.468 | 0.000 | 0.552   | 2.500   |
| ENSG00000100505 | TRIM9         | -3.608 | 0.000 | 0.132   | -1.820 | 0.182 | 0.330   | 0.770   |
| ENSG00000165899 | OTOGL         | -3.619 | 0.000 | 0.016   | -1.993 | 0.098 | 0.039   | 0.099   |
| ENSG00000108576 | SLC6A4        | -3.625 | 0.000 | 0.187   | -2.363 | 0.023 | 0.328   | 1.022   |
| ENSG00000165192 | ASB11         | -3.653 | 0.000 | 0.046   | -4.696 | 0.000 | 0.027   | 0.274   |
| ENSG00000171126 | KCNG3         | -3.711 | 0.000 | 0.132   | -2.806 | 0.000 | 0.182   | 0.624   |
| ENSG00000164794 | KCNV1         | -3.850 | 0.000 | 0.176   | -2.493 | 0.002 | 0.291   | 0.881   |
| ENSG00000184844 | CYCSP45       | -3.863 | 0.000 | 0.113   | -1.660 | 0.230 | 0.374   | 0.733   |
| ENSG00000250328 | CTC-210G5.1   | -3.865 | 0.000 | 0.413   | -3.112 | 0.000 | 0.536   | 2.191   |
| ENSG00000249916 | CTD-2280E9.1  | -4.044 | 0.000 | 0.130   | -2.827 | 0.012 | 0.252   | 1.288   |
| ENSG00000104722 | NEFM          | -4.167 | 0.000 | 0.053   | -2.956 | 0.002 | 0.085   | 0.368   |
| ENSG00000145808 | ADAMTS19      | -4.429 | 0.000 | 0.033   | -2.487 | 0.004 | 0.069   | 0.216   |
| ENSG00000144331 | ZNF385B       | -4.515 | 0.000 | 0.020   | -3.085 | 0.002 | 0.038   | 0.183   |
