# Supplementary material
Source: PubMed Central journal article supplement (PMC4941619)
Supplement: NIHMS775743-supplement-6.pdf [file NIHMS775743-supplement-6.pdf]

| Ensembl_Name    | Gene_Symbol  | HP_Fold | HP_FDR | HP_RPKM  | ControlLeft_RPKM |
|-----------------|--------------|---------|--------|----------|------------------|
| ENSG00000230316 | FEZF1-AS1    | 11.504  | 0.000  | 0.511    | 0.006            |
| ENSG00000172927 | MYEOV        | 8.756   | 0.000  | 10.841   | 0.965            |
| ENSG00000062038 | CDH3         | 8.551   | 0.000  | 8.354    | 0.174            |
| ENSG00000167757 | KLK11        | 8.515   | 0.000  | 7.514    | 0.402            |
| ENSG00000214039 | RP11-474D1.3 | 8.421   | 0.000  | 0.586    | 0.006            |
| ENSG00000137699 | TRIM29       | 8.420   | 0.000  | 9.074    | 0.329            |
| ENSG00000167767 | KRT80        | 7.782   | 0.000  | 1.394    | 0.097            |
| ENSG00000177508 | IRX3         | 7.292   | 0.000  | 0.583    | 0.033            |
| ENSG00000206075 | SERPINB5     | 7.161   | 0.000  | 36.637   | 1.442            |
| ENSG00000167653 | PSCA         | 7.043   | 0.000  | 7.107    | 0.248            |
| ENSG00000101842 | VSIG1        | 6.993   | 0.000  | 7.908    | 0.105            |
| ENSG00000120875 | DUSP4        | 6.956   | 0.000  | 4.206    | 0.310            |
| ENSG00000179546 | HTR1D        | 6.789   | 0.000  | 5.416    | 0.106            |
| ENSG00000005001 | PRSS22       | 6.574   | 0.000  | 21.569   | 0.994            |
| ENSG00000136689 | IL1RN        | 6.148   | 0.000  | 10.166   | 0.946            |
| ENSG00000139515 | PDX1         | 6.019   | 0.000  | 2.042    | 0.274            |
| ENSG00000176842 | IRX5         | 5.921   | 0.000  | 0.307    | 0.018            |
| ENSG00000147206 | NXF3         | 5.799   | 0.000  | 2.243    | 0.206            |
| ENSG00000186474 | KLK12        | 5.765   | 0.000  | 1.599    | 0.131            |
| ENSG00000160181 | TFF2         | 5.642   | 0.000  | 27.211   | 1.921            |
| ENSG00000125207 | PIWIL1       | 5.610   | 0.000  | 1.253    | 0.057            |
| ENSG00000205177 | C11orf91     | 5.602   | 0.000  | 1.655    | 0.145            |
| ENSG00000134757 | DSG3         | 5.592   | 0.000  | 0.927    | 0.031            |
| ENSG00000134193 | REG4         | 5.418   | 0.000  | 1049.734 | 43.238           |
| ENSG00000163993 | S100P        | 5.393   | 0.000  | 261.325  | 32.869           |
| ENSG00000172602 | RND1         | 5.381   | 0.000  | 4.425    | 0.637            |
| ENSG00000255811 | RP1-34M23.5  | 5.357   | 0.000  | 4.886    | 0.169            |
| ENSG00000196188 | CTSE         | 5.281   | 0.000  | 152.515  | 14.411           |
| ENSG00000247844 | CCAT1        | 5.269   | 0.000  | 2.637    | 0.319            |
| ENSG00000186493 | C5orf38      | 5.171   | 0.000  | 0.646    | 0.038            |
| ENSG00000134827 | TCN1         | 5.083   | 0.000  | 1.936    | 0.068            |
| ENSG00000160182 | TFF1         | 5.030   | 0.000  | 1638.629 | 121.506          |
| ENSG00000188910 | GJB3         | 4.997   | 0.000  | 21.350   | 3.441            |
| ENSG00000115507 | OTX1         | 4.888   | 0.000  | 0.109    | 0.008            |
| ENSG00000146250 | PRSS35       | 4.857   | 0.000  | 0.417    | 0.047            |
| ENSG00000112559 | MDFI         | 4.841   | 0.000  | 2.676    | 0.205            |
| ENSG00000116254 | CHD5         | 4.722   | 0.000  | 0.144    | 0.013            |
| ENSG00000178597 | PSAPL1       | 4.719   | 0.000  | 0.141    | 0.003            |
| ENSG00000081138 | CDH7         | 4.709   | 0.000  | 0.066    | 0.005            |
| ENSG00000128564 | VGF          | 4.678   | 0.000  | 0.857    | 0.063            |
| ENSG00000128683 | GAD1         | 4.666   | 0.000  | 0.084    | 0.008            |
| ENSG00000175832 | ETV4         | 4.636   | 0.000  | 5.522    | 0.958            |
| ENSG00000006327 | TNFRSF12A    | 4.582   | 0.000  | 26.876   | 4.941            |
| ENSG00000189433 | GJB4         | 4.557   | 0.000  | 2.813    | 0.123            |
| ENSG00000184292 | TACSTD2      | 4.540   | 0.000  | 2.146    | 0.204            |

|                 |              |       |       |        |        |
|-----------------|--------------|-------|-------|--------|--------|
| ENSG00000173227 | SYT12        | 4.474 | 0.000 | 0.801  | 0.051  |
| ENSG00000140254 | DUOXA1       | 4.405 | 0.000 | 7.455  | 0.296  |
| ENSG00000171017 | LRRC8E       | 4.374 | 0.000 | 2.077  | 0.434  |
| ENSG00000115008 | IL1A         | 4.365 | 0.000 | 0.904  | 0.102  |
| ENSG00000125657 | TNFSF9       | 4.339 | 0.000 | 1.372  | 0.212  |
| ENSG00000245694 | CRNDE        | 4.313 | 0.000 | 0.726  | 0.131  |
| ENSG00000225328 | AC019100.3   | 4.287 | 0.000 | 1.067  | 0.120  |
| ENSG00000181649 | PHLDA2       | 4.286 | 0.000 | 39.011 | 8.196  |
| ENSG00000214248 | AC010336.1   | 4.274 | 0.000 | 1.459  | 0.317  |
| ENSG00000188100 | FAM25A       | 4.260 | 0.000 | 0.684  | 0.000  |
| ENSG00000172031 | EPHX4        | 4.253 | 0.000 | 1.181  | 0.086  |
| ENSG00000133985 | TTC9         | 4.250 | 0.000 | 2.894  | 0.394  |
| ENSG00000102854 | MSLN         | 4.247 | 0.000 | 12.866 | 1.932  |
| ENSG00000189280 | GJB5         | 4.225 | 0.000 | 6.315  | 0.139  |
| ENSG00000168502 | SOGA2        | 4.207 | 0.000 | 1.682  | 0.251  |
| ENSG00000137033 | IL33         | 4.207 | 0.000 | 8.454  | 1.328  |
| ENSG00000168427 | KLHL30       | 4.192 | 0.000 | 0.908  | 0.020  |
| ENSG00000236039 | AC019117.2   | 4.178 | 0.000 | 3.905  | 0.679  |
| ENSG00000137203 | TFAP2A       | 4.166 | 0.000 | 0.586  | 0.094  |
| ENSG00000128713 | HOXD11       | 4.132 | 0.000 | 7.312  | 1.747  |
| ENSG00000170178 | HOXD12       | 4.124 | 0.000 | 2.729  | 0.316  |
| ENSG00000182747 | SLC35D3      | 4.116 | 0.000 | 0.200  | 0.024  |
| ENSG00000134070 | IRAK2        | 4.076 | 0.000 | 4.529  | 0.993  |
| ENSG00000111700 | SLCO1B3      | 4.075 | 0.000 | 0.197  | 0.004  |
| ENSG00000196228 | SULT1C3      | 4.041 | 0.000 | 1.472  | 0.155  |
| ENSG00000159261 | CLDN14       | 4.017 | 0.000 | 0.428  | 0.017  |
| ENSG00000228353 | RP11-184A2.2 | 3.992 | 0.000 | 1.395  | 0.161  |
| ENSG00000158023 | WDR66        | 3.969 | 0.000 | 0.158  | 0.030  |
| ENSG00000128965 | CHAC1        | 3.933 | 0.000 | 4.747  | 0.702  |
| ENSG00000004848 | ARX          | 3.930 | 0.000 | 1.828  | 0.329  |
| ENSG00000142627 | EPHA2        | 3.914 | 0.000 | 31.128 | 7.391  |
| ENSG00000181634 | TNFSF15      | 3.909 | 0.000 | 2.197  | 0.384  |
| ENSG00000135480 | KRT7         | 3.905 | 0.000 | 2.056  | 0.105  |
| ENSG00000166268 | MYRFL        | 3.880 | 0.000 | 1.828  | 0.254  |
| ENSG00000136574 | GATA4        | 3.850 | 0.000 | 0.213  | 0.010  |
| ENSG00000173156 | RHOD         | 3.838 | 0.000 | 23.070 | 4.875  |
| ENSG00000167772 | ANGPTL4      | 3.837 | 0.000 | 5.815  | 1.276  |
| ENSG00000065833 | ME1          | 3.829 | 0.000 | 24.389 | 5.495  |
| ENSG00000226598 | AC017060.1   | 3.804 | 0.000 | 2.874  | 0.478  |
| ENSG00000154928 | EPHB1        | 3.801 | 0.000 | 0.083  | 0.009  |
| ENSG00000253368 | TRNP1        | 3.730 | 0.000 | 3.650  | 0.455  |
| ENSG00000169908 | TM4SF1       | 3.729 | 0.000 | 50.029 | 11.763 |
| ENSG00000130643 | CALY         | 3.726 | 0.000 | 0.443  | 0.058  |
| ENSG00000241322 | CDRT1        | 3.709 | 0.000 | 0.190  | 0.020  |
| ENSG00000167332 | OR51E2       | 3.690 | 0.000 | 4.601  | 0.402  |
| ENSG00000198835 | GJC2         | 3.689 | 0.000 | 0.747  | 0.142  |
| ENSG00000133454 | MYO18B       | 3.684 | 0.000 | 0.071  | 0.009  |

|                 |               |       |       |         |        |
|-----------------|---------------|-------|-------|---------|--------|
| ENSG00000257671 | RP3-416H24.1  | 3.632 | 0.000 | 1.225   | 0.078  |
| ENSG00000159263 | SIM2          | 3.629 | 0.000 | 0.611   | 0.081  |
| ENSG00000254693 | RP11-58K22.5  | 3.628 | 0.000 | 13.438  | 3.156  |
| ENSG00000165376 | CLDN2         | 3.615 | 0.000 | 1.128   | 0.125  |
| ENSG00000088992 | TESC          | 3.603 | 0.000 | 2.307   | 0.484  |
| ENSG00000085117 | CD82          | 3.587 | 0.000 | 19.704  | 4.904  |
| ENSG00000249700 | SRD5A3-AS1    | 3.574 | 0.000 | 4.375   | 1.170  |
| ENSG00000096395 | MLN           | 3.572 | 0.000 | 2.936   | 0.000  |
| ENSG00000153292 | GPR110        | 3.547 | 0.000 | 0.773   | 0.166  |
| ENSG00000205502 | C2CD4B        | 3.538 | 0.000 | 1.130   | 0.197  |
| ENSG00000181652 | ATG9B         | 3.532 | 0.000 | 0.668   | 0.153  |
| ENSG00000250971 | RP11-696F12.1 | 3.521 | 0.000 | 2.266   | 1.540  |
| ENSG00000257453 | RP11-290L1.3  | 3.517 | 0.000 | 17.661  | 3.497  |
| ENSG00000147689 | FAM83A        | 3.484 | 0.000 | 0.132   | 0.024  |
| ENSG00000185022 | MAFF          | 3.482 | 0.000 | 14.694  | 3.790  |
| ENSG00000088826 | SMOX          | 3.478 | 0.000 | 3.990   | 0.995  |
| ENSG00000248323 | LUCAT1        | 3.467 | 0.000 | 0.190   | 0.020  |
| ENSG00000222636 | RN7SKP54      | 3.406 | 0.000 | 116.762 | 28.418 |
| ENSG00000186451 | SPATA12       | 3.394 | 0.000 | 0.171   | 0.025  |
| ENSG00000148346 | LCN2          | 3.393 | 0.000 | 72.180  | 14.526 |
| ENSG00000185567 | AHNAK2        | 3.386 | 0.000 | 1.265   | 0.264  |
| ENSG00000258791 | LINC00520     | 3.381 | 0.000 | 3.277   | 0.388  |
| ENSG00000130720 | FIBCD1        | 3.370 | 0.000 | 7.052   | 1.445  |
| ENSG00000181773 | GPR3          | 3.368 | 0.000 | 0.206   | 0.024  |
| ENSG00000185761 | ADAMTSL5      | 3.323 | 0.000 | 2.725   | 0.749  |
| ENSG00000102934 | PLLIP         | 3.306 | 0.000 | 39.331  | 8.905  |
| ENSG00000116741 | RGS2          | 3.306 | 0.000 | 32.353  | 8.971  |
| ENSG00000135046 | ANXA1         | 3.299 | 0.000 | 29.674  | 7.505  |
| ENSG00000169247 | SH3TC2        | 3.284 | 0.000 | 0.419   | 0.105  |
| ENSG00000128039 | SRD5A3        | 3.283 | 0.000 | 9.583   | 2.839  |
| ENSG00000102265 | TIMP1         | 3.273 | 0.000 | 73.086  | 20.421 |
| ENSG00000136872 | ALDOB         | 3.271 | 0.000 | 31.230  | 2.565  |
| ENSG00000101144 | BMP7          | 3.258 | 0.000 | 2.014   | 0.524  |
| ENSG00000162009 | SSTR5         | 3.249 | 0.000 | 0.687   | 0.090  |
| ENSG00000167612 | ANKRD33       | 3.249 | 0.000 | 0.121   | 0.000  |
| ENSG00000170786 | SDR16C5       | 3.248 | 0.000 | 16.382  | 3.862  |
| ENSG00000198535 | C2CD4A        | 3.231 | 0.000 | 0.855   | 0.179  |
| ENSG00000013588 | GPRC5A        | 3.210 | 0.000 | 143.052 | 41.998 |
| ENSG00000124557 | BTN1A1        | 3.199 | 0.000 | 0.134   | 0.022  |
| ENSG00000215864 | NBPF7         | 3.194 | 0.000 | 2.029   | 0.573  |
| ENSG00000088836 | SLC4A11       | 3.193 | 0.000 | 1.025   | 0.173  |
| ENSG00000160862 | AZGP1         | 3.185 | 0.000 | 10.280  | 2.485  |
| ENSG00000163737 | PF4           | 3.169 | 0.000 | 1.734   | 0.342  |
| ENSG00000131910 | NROB2         | 3.162 | 0.000 | 1.537   | 0.361  |
| ENSG00000139289 | PHLDA1        | 3.151 | 0.000 | 6.715   | 1.830  |
| ENSG00000157064 | NMNAT2        | 3.141 | 0.000 | 0.323   | 0.036  |
| ENSG00000196754 | S100A2        | 3.134 | 0.000 | 0.601   | 0.150  |

|                 |                |       |       |        |        |
|-----------------|----------------|-------|-------|--------|--------|
| ENSG00000163064 | EN1            | 3.112 | 0.000 | 0.530  | 0.002  |
| ENSG00000107984 | DKK1           | 3.109 | 0.000 | 1.091  | 0.102  |
| ENSG00000258919 | RP11-1029J19.4 | 3.107 | 0.000 | 1.905  | 0.437  |
| ENSG00000100003 | SEC14L2        | 3.084 | 0.000 | 1.409  | 0.386  |
| ENSG00000187288 | CIDEC          | 3.078 | 0.000 | 29.515 | 6.684  |
| ENSG00000169248 | CXCL11         | 3.072 | 0.001 | 0.904  | 0.170  |
| ENSG00000161326 | DUSP14         | 3.071 | 0.000 | 1.761  | 0.550  |
| ENSG00000008300 | CELSR3         | 3.069 | 0.000 | 1.227  | 0.353  |
| ENSG00000118271 | TTR            | 3.060 | 0.000 | 3.424  | 0.894  |
| ENSG00000221947 | XKR9           | 3.054 | 0.000 | 1.669  | 0.362  |
| ENSG00000174279 | EVX2           | 3.052 | 0.001 | 0.721  | 0.104  |
| ENSG00000196352 | CD55           | 3.030 | 0.000 | 40.638 | 7.900  |
| ENSG00000152669 | CCNO           | 3.020 | 0.000 | 1.887  | 0.449  |
| ENSG00000095739 | BAMBI          | 3.010 | 0.000 | 12.302 | 3.496  |
| ENSG00000125744 | RTN2           | 3.009 | 0.000 | 3.607  | 1.085  |
| ENSG00000113070 | HBEGF          | 3.004 | 0.000 | 18.611 | 4.237  |
| ENSG00000162366 | PDZK1IP1       | 2.998 | 0.000 | 48.929 | 14.771 |
| ENSG00000250900 | CTC-338M12.6   | 2.997 | 0.000 | 0.863  | 0.218  |
| ENSG00000142700 | DMRTA2         | 2.996 | 0.001 | 0.101  | 0.013  |
| ENSG00000043355 | ZIC2           | 2.980 | 0.001 | 0.277  | 0.019  |
| ENSG00000100078 | PLA2G3         | 2.965 | 0.001 | 0.415  | 0.088  |
| ENSG00000198842 | DUSP27         | 2.963 | 0.001 | 0.392  | 0.035  |
| ENSG00000169583 | CLIC3          | 2.959 | 0.000 | 4.047  | 0.930  |
| ENSG00000178473 | UCN3           | 2.950 | 0.000 | 16.171 | 3.929  |
| ENSG00000163817 | SLC6A20        | 2.936 | 0.002 | 7.183  | 0.985  |
| ENSG00000168631 | DPCR1          | 2.935 | 0.002 | 0.341  | 0.011  |
| ENSG00000166396 | SERPINB7       | 2.929 | 0.001 | 0.664  | 0.008  |
| ENSG00000223458 | RP11-332E3.2   | 2.923 | 0.002 | 2.084  | 0.294  |
| ENSG00000087085 | ACHE           | 2.916 | 0.000 | 18.310 | 5.771  |
| ENSG00000168209 | DDIT4          | 2.916 | 0.000 | 35.413 | 11.017 |
| ENSG00000259230 | CTD-2555C10.3  | 2.914 | 0.001 | 0.741  | 0.155  |
| ENSG00000114378 | HYAL1          | 2.907 | 0.000 | 6.085  | 1.807  |
| ENSG00000168754 | FAM178B        | 2.899 | 0.000 | 0.206  | 0.050  |
| ENSG00000257046 | LST3           | 2.895 | 0.002 | 0.125  | 0.008  |
| ENSG00000187642 | C1orf170       | 2.886 | 0.000 | 0.298  | 0.076  |
| ENSG00000187258 | NPSR1          | 2.885 | 0.002 | 0.220  | 0.022  |
| ENSG00000178734 | C13orf45       | 2.877 | 0.002 | 0.857  | 0.152  |
| ENSG00000137673 | MMP7           | 2.869 | 0.002 | 0.608  | 0.045  |
| ENSG00000139725 | RHOF           | 2.865 | 0.000 | 48.470 | 16.184 |
| ENSG00000236081 | AC074389.9     | 2.863 | 0.000 | 0.732  | 0.180  |
| ENSG00000132911 | NMUR2          | 2.855 | 0.002 | 0.177  | 0.009  |
| ENSG00000163739 | CXCL1          | 2.845 | 0.000 | 11.946 | 3.003  |
| ENSG00000254166 | CASC19         | 2.839 | 0.001 | 1.678  | 0.379  |
| ENSG00000219607 | PPP1R3G        | 2.839 | 0.000 | 2.296  | 0.606  |
| ENSG00000135919 | SERPINE2       | 2.837 | 0.000 | 7.950  | 2.508  |
| ENSG00000146054 | TRIM7          | 2.826 | 0.000 | 1.944  | 0.610  |
| ENSG00000117394 | SLC2A1         | 2.824 | 0.000 | 43.357 | 15.210 |

|                 |               |       |       |        |        |
|-----------------|---------------|-------|-------|--------|--------|
| ENSG00000251537 | RP11-385D13.1 | 2.820 | 0.000 | 2.120  | 0.708  |
| ENSG00000137225 | CAPN11        | 2.818 | 0.000 | 1.221  | 0.324  |
| ENSG00000134317 | GRHL1         | 2.817 | 0.000 | 0.429  | 0.117  |
| ENSG00000163734 | CXCL3         | 2.812 | 0.000 | 5.541  | 1.757  |
| ENSG00000234667 | ACTBP13       | 2.809 | 0.003 | 0.099  | 0.013  |
| ENSG00000161647 | MPP3          | 2.803 | 0.000 | 1.218  | 0.415  |
| ENSG00000113763 | UNC5A         | 2.802 | 0.003 | 0.107  | 0.019  |
| ENSG00000149798 | CDC42EP2      | 2.776 | 0.000 | 6.128  | 2.048  |
| ENSG00000167755 | KLK6          | 2.776 | 0.002 | 0.241  | 0.005  |
| ENSG00000169047 | IRS1          | 2.772 | 0.000 | 7.377  | 2.494  |
| ENSG00000242265 | PEG10         | 2.756 | 0.000 | 1.282  | 0.387  |
| ENSG00000011422 | PLAUR         | 2.755 | 0.000 | 41.141 | 14.177 |
| ENSG00000164379 | FOXQ1         | 2.745 | 0.000 | 1.658  | 0.174  |
| ENSG00000158089 | GALNT14       | 2.743 | 0.003 | 0.142  | 0.025  |
| ENSG00000197261 | C6orf141      | 2.739 | 0.000 | 5.631  | 1.995  |
| ENSG00000152128 | TMEM163       | 2.736 | 0.000 | 0.302  | 0.087  |
| ENSG00000143217 | PVRL4         | 2.731 | 0.000 | 4.065  | 1.436  |
| ENSG00000133169 | BEX1          | 2.721 | 0.001 | 1.932  | 0.547  |
| ENSG00000168679 | SLC16A4       | 2.715 | 0.000 | 3.222  | 0.602  |
| ENSG00000105464 | GRIN2D        | 2.713 | 0.001 | 0.377  | 0.103  |
| ENSG00000198203 | SULT1C2       | 2.713 | 0.002 | 5.124  | 1.354  |
| ENSG00000040608 | RTN4R         | 2.712 | 0.000 | 2.008  | 0.663  |
| ENSG00000099960 | SLC7A4        | 2.701 | 0.000 | 3.304  | 1.173  |
| ENSG00000165816 | VWA2          | 2.700 | 0.001 | 0.826  | 0.228  |
| ENSG00000128610 | FEZF1         | 2.695 | 0.004 | 0.109  | 0.009  |
| ENSG00000140519 | RHCG          | 2.680 | 0.004 | 0.309  | 0.055  |
| ENSG00000124233 | SEMG1         | 2.674 | 0.003 | 0.404  | 0.094  |
| ENSG00000109511 | ANXA10        | 2.671 | 0.005 | 4.016  | 0.102  |
| ENSG00000138166 | DUSP5         | 2.668 | 0.000 | 31.780 | 10.752 |
| ENSG00000183018 | SPNS2         | 2.668 | 0.000 | 26.257 | 5.113  |
| ENSG00000167105 | TMEM92        | 2.667 | 0.000 | 3.705  | 1.189  |
| ENSG00000169876 | MUC17         | 2.666 | 0.001 | 21.824 | 6.605  |
| ENSG00000229950 | TFAP2A-AS1    | 2.663 | 0.002 | 0.294  | 0.077  |
| ENSG00000185332 | TMEM105       | 2.662 | 0.000 | 0.299  | 0.089  |
| ENSG00000142661 | MYOM3         | 2.657 | 0.000 | 2.329  | 0.815  |
| ENSG00000163132 | MSX1          | 2.656 | 0.001 | 0.264  | 0.069  |
| ENSG00000247993 | RP11-79P5.2   | 2.655 | 0.005 | 1.123  | 0.135  |
| ENSG00000169903 | TM4SF4        | 2.654 | 0.004 | 7.788  | 0.308  |
| ENSG00000188735 | TMEM120B      | 2.654 | 0.000 | 20.874 | 7.691  |
| ENSG00000172183 | ISG20         | 2.651 | 0.000 | 9.708  | 3.571  |
| ENSG00000005238 | FAM214B       | 2.643 | 0.000 | 15.200 | 5.690  |
| ENSG00000169258 | GPRIN1        | 2.639 | 0.000 | 7.427  | 2.312  |
| ENSG00000092929 | UNC13D        | 2.638 | 0.000 | 24.662 | 8.766  |
| ENSG00000164816 | DEFA5         | 2.637 | 0.005 | 2.368  | 19.352 |
| ENSG00000058085 | LAMC2         | 2.637 | 0.000 | 39.758 | 14.246 |
| ENSG00000183900 | AC099522.1    | 2.636 | 0.005 | 0.460  | 0.045  |
| ENSG00000204632 | HLA-G         | 2.632 | 0.004 | 52.343 | 7.756  |

|                 |                |       |       |         |         |
|-----------------|----------------|-------|-------|---------|---------|
| ENSG00000237686 | RP5-1120P11.1  | 2.628 | 0.002 | 0.846   | 0.239   |
| ENSG00000162975 | KCNF1          | 2.626 | 0.000 | 0.624   | 0.204   |
| ENSG00000121653 | MAPK8IP1       | 2.623 | 0.000 | 1.340   | 0.469   |
| ENSG00000128203 | ASPHD2         | 2.623 | 0.000 | 5.248   | 1.902   |
| ENSG00000158055 | GRHL3          | 2.612 | 0.001 | 0.704   | 0.089   |
| ENSG00000128422 | KRT17          | 2.611 | 0.004 | 0.272   | 0.035   |
| ENSG00000231826 | AC016735.2     | 2.610 | 0.006 | 0.643   | 0.019   |
| ENSG00000126778 | SIX1           | 2.599 | 0.005 | 0.047   | 0.005   |
| ENSG00000008735 | MAPK8IP2       | 2.594 | 0.000 | 0.761   | 0.274   |
| ENSG00000243802 | RP11-390K5.1   | 2.586 | 0.005 | 1.262   | 0.263   |
| ENSG00000222033 | LINC01124      | 2.585 | 0.000 | 0.425   | 0.136   |
| ENSG00000204052 | LRRC73         | 2.582 | 0.001 | 0.437   | 0.135   |
| ENSG00000181577 | C6orf223       | 2.582 | 0.005 | 4.749   | 1.077   |
| ENSG00000105219 | CNTD2          | 2.578 | 0.005 | 0.315   | 0.076   |
| ENSG00000173898 | SPTBN2         | 2.575 | 0.000 | 1.619   | 0.530   |
| ENSG00000131037 | EPS8L1         | 2.575 | 0.000 | 25.931  | 9.628   |
| ENSG00000214049 | UCA1           | 2.573 | 0.007 | 11.940  | 1.965   |
| ENSG00000186860 | KRTAP17-1      | 2.569 | 0.003 | 0.251   | 0.000   |
| ENSG00000142549 | IGLON5         | 2.563 | 0.006 | 0.090   | 0.006   |
| ENSG00000124107 | SLPI           | 2.562 | 0.000 | 132.696 | 46.946  |
| ENSG00000129990 | SYT5           | 2.562 | 0.001 | 0.373   | 0.117   |
| ENSG00000255071 | SAA2-SAA4      | 2.562 | 0.005 | 0.396   | 0.018   |
| ENSG00000204335 | SP5            | 2.558 | 0.001 | 0.633   | 0.202   |
| ENSG00000171811 | TTC40          | 2.556 | 0.005 | 0.048   | 0.012   |
| ENSG00000221926 | TRIM16         | 2.555 | 0.000 | 5.127   | 1.948   |
| ENSG00000138347 | MYPN           | 2.554 | 0.000 | 1.166   | 0.393   |
| ENSG00000176083 | ZNF683         | 2.548 | 0.004 | 0.273   | 0.070   |
| ENSG00000182836 | PLCXD3         | 2.546 | 0.001 | 0.151   | 0.049   |
| ENSG00000258689 | RP6-65G23.1    | 2.540 | 0.006 | 0.461   | 0.035   |
| ENSG00000130164 | LDLR           | 2.538 | 0.000 | 23.244  | 8.602   |
| ENSG00000163191 | S100A11        | 2.538 | 0.000 | 330.494 | 126.396 |
| ENSG00000251179 | RP11-893F2.9   | 2.533 | 0.006 | 0.722   | 0.176   |
| ENSG00000108309 | RUNDC3A        | 2.533 | 0.000 | 0.724   | 0.243   |
| ENSG00000187583 | PLEKHN1        | 2.529 | 0.001 | 0.917   | 0.305   |
| ENSG00000124216 | SNAI1          | 2.527 | 0.000 | 0.679   | 0.230   |
| ENSG00000181791 | AC009041.1     | 2.525 | 0.003 | 3.781   | 0.275   |
| ENSG00000006704 | GTF2IRD1       | 2.519 | 0.000 | 3.599   | 1.402   |
| ENSG00000114771 | AADAC          | 2.512 | 0.003 | 0.503   | 0.150   |
| ENSG00000204165 | CXorf65        | 2.509 | 0.000 | 0.988   | 0.341   |
| ENSG00000137857 | DUOX1          | 2.508 | 0.000 | 1.065   | 0.379   |
| ENSG00000137331 | IER3           | 2.504 | 0.001 | 71.126  | 24.044  |
| ENSG00000128165 | ADM2           | 2.494 | 0.000 | 3.135   | 1.130   |
| ENSG00000170231 | FABP6          | 2.492 | 0.009 | 0.341   | 0.065   |
| ENSG00000258404 | RP11-1029J19.5 | 2.488 | 0.009 | 0.818   | 0.162   |
| ENSG00000214376 | VSTM5          | 2.483 | 0.000 | 3.330   | 1.262   |
| ENSG00000006534 | ALDH3B1        | 2.481 | 0.000 | 7.004   | 2.704   |
| ENSG00000110092 | CCND1          | 2.478 | 0.000 | 25.407  | 10.102  |

|                 |               |       |       |         |        |
|-----------------|---------------|-------|-------|---------|--------|
| ENSG00000255498 | RP11-618K13.2 | 2.476 | 0.002 | 2.366   | 0.760  |
| ENSG00000159363 | ATP13A2       | 2.476 | 0.000 | 24.501  | 9.739  |
| ENSG00000204539 | CDSN          | 2.474 | 0.005 | 3.675   | 1.086  |
| ENSG00000089723 | OTUB2         | 2.473 | 0.000 | 1.638   | 0.601  |
| ENSG00000142677 | IL22RA1       | 2.473 | 0.000 | 51.860  | 20.379 |
| ENSG00000146038 | DCDC2         | 2.470 | 0.003 | 2.268   | 0.677  |
| ENSG00000100228 | RAB36         | 2.466 | 0.000 | 0.925   | 0.334  |
| ENSG00000161921 | CXCL16        | 2.464 | 0.000 | 35.461  | 14.097 |
| ENSG00000176903 | PNMA1         | 2.462 | 0.000 | 17.989  | 7.276  |
| ENSG00000140279 | DUOX2         | 2.454 | 0.011 | 44.942  | 6.050  |
| ENSG00000204634 | TBC1D8        | 2.449 | 0.000 | 7.796   | 3.128  |
| ENSG00000124780 | KCNK17        | 2.442 | 0.002 | 0.264   | 0.087  |
| ENSG00000234602 | MCIDAS        | 2.438 | 0.011 | 0.159   | 0.032  |
| ENSG00000106089 | STX1A         | 2.437 | 0.000 | 2.062   | 0.800  |
| ENSG00000182240 | BACE2         | 2.433 | 0.000 | 33.778  | 12.827 |
| ENSG00000103888 | KIAA1199      | 2.431 | 0.000 | 1.420   | 0.522  |
| ENSG00000069011 | PITX1         | 2.428 | 0.000 | 6.040   | 2.395  |
| ENSG00000112414 | GPR126        | 2.427 | 0.000 | 6.479   | 2.459  |
| ENSG00000171951 | SCG2          | 2.423 | 0.001 | 9.828   | 3.622  |
| ENSG00000136383 | ALPK3         | 2.413 | 0.000 | 0.640   | 0.235  |
| ENSG00000183914 | DNAH2         | 2.412 | 0.003 | 0.211   | 0.070  |
| ENSG00000174307 | PHLDA3        | 2.398 | 0.000 | 5.738   | 2.322  |
| ENSG00000138135 | CH25H         | 2.395 | 0.000 | 2.191   | 0.816  |
| ENSG00000240541 | TM4SF1-AS1    | 2.393 | 0.003 | 0.717   | 0.241  |
| ENSG00000175505 | CLCF1         | 2.383 | 0.000 | 3.933   | 1.624  |
| ENSG00000136802 | LRRC8A        | 2.378 | 0.000 | 17.696  | 7.387  |
| ENSG00000226526 | RP1-37C10.3   | 2.376 | 0.000 | 10.054  | 4.135  |
| ENSG00000181126 | HLA-V         | 2.373 | 0.013 | 2.005   | 0.171  |
| ENSG00000162078 | ZG16B         | 2.372 | 0.000 | 58.212  | 22.976 |
| ENSG00000137193 | PIM1          | 2.372 | 0.000 | 31.931  | 13.228 |
| ENSG00000159784 | FAM131B       | 2.369 | 0.000 | 0.181   | 0.069  |
| ENSG00000112494 | UNC93A        | 2.364 | 0.010 | 0.287   | 0.082  |
| ENSG00000116663 | FBXO6         | 2.362 | 0.000 | 6.238   | 2.633  |
| ENSG00000214128 | TMEM213       | 2.360 | 0.007 | 0.091   | 0.027  |
| ENSG00000172410 | INSL5         | 2.351 | 0.015 | 257.102 | 55.786 |
| ENSG00000141497 | ZMYND15       | 2.348 | 0.000 | 2.001   | 0.790  |
| ENSG00000164283 | ESM1          | 2.342 | 0.016 | 0.151   | 0.030  |
| ENSG00000221887 | HMSD          | 2.337 | 0.000 | 2.670   | 1.109  |
| ENSG00000197696 | NMB           | 2.334 | 0.000 | 2.224   | 0.909  |
| ENSG00000143921 | ABCG8         | 2.333 | 0.008 | 0.414   | 0.127  |
| ENSG00000185739 | SRL           | 2.332 | 0.004 | 0.137   | 0.047  |
| ENSG00000105989 | WNT2          | 2.329 | 0.014 | 0.108   | 0.013  |
| ENSG00000152076 | CCDC74B       | 2.328 | 0.004 | 0.147   | 0.051  |
| ENSG00000161249 | DMKN          | 2.325 | 0.000 | 1.469   | 0.615  |
| ENSG00000124143 | ARHGAP40      | 2.325 | 0.013 | 0.089   | 0.009  |
| ENSG00000176998 | HCG4          | 2.325 | 0.016 | 2.427   | 0.370  |
| ENSG00000154217 | PITPNC1       | 2.324 | 0.000 | 7.493   | 3.224  |

|                 |               |       |       |        |        |
|-----------------|---------------|-------|-------|--------|--------|
| ENSG00000142484 | TM4SF5        | 2.324 | 0.000 | 32.984 | 13.177 |
| ENSG00000138772 | ANXA3         | 2.323 | 0.000 | 19.298 | 7.891  |
| ENSG00000119547 | ONECUT2       | 2.323 | 0.000 | 0.172  | 0.071  |
| ENSG00000120149 | MSX2          | 2.321 | 0.009 | 0.211  | 0.064  |
| ENSG00000178531 | CTXN1         | 2.319 | 0.012 | 0.692  | 0.192  |
| ENSG00000151883 | PARP8         | 2.319 | 0.000 | 3.113  | 1.263  |
| ENSG00000150556 | LYPD6B        | 2.315 | 0.000 | 1.277  | 0.502  |
| ENSG00000124225 | PMEPA1        | 2.314 | 0.000 | 10.895 | 4.680  |
| ENSG00000198807 | PAX9          | 2.313 | 0.010 | 0.139  | 0.043  |
| ENSG00000153395 | LPCAT1        | 2.310 | 0.000 | 7.052  | 2.938  |
| ENSG00000165507 | C10orf10      | 2.310 | 0.000 | 6.632  | 2.784  |
| ENSG00000115009 | CCL20         | 2.310 | 0.009 | 27.263 | 8.913  |
| ENSG00000145911 | N4BP3         | 2.307 | 0.000 | 1.516  | 0.634  |
| ENSG00000214226 | C17orf67      | 2.304 | 0.000 | 2.026  | 0.860  |
| ENSG00000138028 | CGREF1        | 2.303 | 0.001 | 3.738  | 1.423  |
| ENSG00000151364 | KCTD14        | 2.299 | 0.000 | 16.882 | 6.999  |
| ENSG00000235884 | LINC00941     | 2.297 | 0.015 | 0.122  | 0.013  |
| ENSG00000243444 | PALM2         | 2.296 | 0.002 | 0.134  | 0.051  |
| ENSG00000236675 | MTX1P1        | 2.295 | 0.001 | 1.032  | 0.398  |
| ENSG00000198576 | ARC           | 2.286 | 0.016 | 0.172  | 0.018  |
| ENSG00000130513 | GDF15         | 2.282 | 0.003 | 20.007 | 7.548  |
| ENSG00000108001 | EBF3          | 2.281 | 0.016 | 0.054  | 0.014  |
| ENSG00000118898 | PPL           | 2.277 | 0.000 | 5.759  | 2.449  |
| ENSG00000259721 | RP11-758N13.1 | 2.277 | 0.019 | 0.345  | 0.086  |
| ENSG00000149043 | SYT8          | 2.272 | 0.000 | 0.842  | 0.342  |
| ENSG00000173237 | C11orf86      | 2.271 | 0.000 | 78.448 | 32.372 |
| ENSG00000161652 | IZUMO2        | 2.270 | 0.014 | 0.309  | 0.027  |
| ENSG00000175426 | PCSK1         | 2.264 | 0.000 | 2.698  | 1.130  |
| ENSG00000255655 | RP11-256L11.3 | 2.263 | 0.014 | 0.800  | 0.252  |
| ENSG00000226872 | AC002472.11   | 2.262 | 0.005 | 1.146  | 0.423  |
| ENSG00000163874 | ZC3H12A       | 2.260 | 0.000 | 14.227 | 6.097  |
| ENSG00000109321 | AREG          | 2.258 | 0.009 | 0.700  | 0.244  |
| ENSG00000034152 | MAP2K3        | 2.256 | 0.000 | 30.609 | 13.658 |
| ENSG00000094755 | GABRP         | 2.254 | 0.012 | 0.182  | 0.056  |
| ENSG00000128710 | HOXD10        | 2.254 | 0.016 | 10.706 | 3.496  |
| ENSG00000138759 | FRAS1         | 2.251 | 0.002 | 0.754  | 0.300  |
| ENSG00000197019 | SERTAD1       | 2.249 | 0.000 | 14.421 | 6.457  |
| ENSG00000144655 | CSRNP1        | 2.246 | 0.000 | 11.375 | 4.876  |
| ENSG00000184905 | TCEAL2        | 2.245 | 0.023 | 0.138  | 0.023  |
| ENSG00000171223 | JUNB          | 2.245 | 0.001 | 98.507 | 40.561 |
| ENSG00000245311 | RP11-165P7.1  | 2.236 | 0.013 | 0.555  | 0.185  |
| ENSG00000170561 | IRX2          | 2.235 | 0.022 | 1.428  | 0.180  |
| ENSG00000134020 | PEBP4         | 2.233 | 0.020 | 0.196  | 0.053  |
| ENSG00000135253 | KCP           | 2.233 | 0.000 | 2.484  | 1.113  |
| ENSG00000100373 | UPK3A         | 2.229 | 0.017 | 0.785  | 0.249  |
| ENSG00000223552 | RP11-24F11.2  | 2.228 | 0.001 | 1.911  | 0.802  |
| ENSG00000133710 | SPINK5        | 2.227 | 0.005 | 16.712 | 6.391  |



|                 |              |       |       |         |        |
|-----------------|--------------|-------|-------|---------|--------|
| ENSG00000239948 | RN7SL368P    | 2.217 | 0.014 | 1.493   | 0.490  |
| ENSG00000134107 | BHLHE40      | 2.215 | 0.000 | 26.052  | 11.291 |
| ENSG00000231133 | HAR1B        | 2.214 | 0.026 | 0.700   | 0.160  |
| ENSG00000176720 | BOK          | 2.214 | 0.000 | 7.130   | 3.266  |
| ENSG00000079337 | RAPGEF3      | 2.213 | 0.000 | 2.353   | 1.017  |
| ENSG00000128578 | STRIP2       | 2.213 | 0.003 | 1.140   | 0.446  |
| ENSG00000007384 | RHBDF1       | 2.209 | 0.000 | 14.864  | 6.807  |
| ENSG00000117407 | ARTN         | 2.208 | 0.004 | 2.459   | 1.000  |
| ENSG00000151012 | SLC7A11      | 2.207 | 0.001 | 2.042   | 0.845  |
| ENSG00000130475 | FCHO1        | 2.197 | 0.000 | 2.806   | 1.238  |
| ENSG00000130477 | UNC13A       | 2.193 | 0.001 | 0.261   | 0.110  |
| ENSG00000168389 | MFSD2A       | 2.192 | 0.000 | 9.621   | 4.251  |
| ENSG00000178404 | DDC8         | 2.191 | 0.000 | 6.919   | 3.072  |
| ENSG00000205517 | RGL3         | 2.182 | 0.001 | 7.677   | 3.282  |
| ENSG00000135472 | FAIM2        | 2.182 | 0.010 | 0.320   | 0.119  |
| ENSG00000137267 | TUBB2A       | 2.181 | 0.002 | 9.329   | 3.862  |
| ENSG00000151929 | BAG3         | 2.180 | 0.000 | 19.689  | 9.162  |
| ENSG00000132357 | CARD6        | 2.179 | 0.000 | 1.328   | 0.572  |
| ENSG00000185479 | KRT6B        | 2.178 | 0.029 | 0.088   | 0.012  |
| ENSG00000105355 | PLIN3        | 2.178 | 0.000 | 97.879  | 44.914 |
| ENSG00000132821 | VSTM2L       | 2.174 | 0.002 | 0.807   | 0.334  |
| ENSG00000157350 | ST3GAL2      | 2.174 | 0.000 | 3.190   | 1.480  |
| ENSG00000060558 | GNA15        | 2.173 | 0.000 | 3.347   | 1.458  |
| ENSG00000127528 | KLF2         | 2.173 | 0.007 | 13.283  | 5.321  |
| ENSG00000166592 | RRAD         | 2.173 | 0.006 | 1.472   | 0.579  |
| ENSG00000171873 | ADRA1D       | 2.172 | 0.029 | 0.165   | 0.033  |
| ENSG00000081041 | CXCL2        | 2.172 | 0.004 | 3.634   | 1.471  |
| ENSG00000100196 | KDELR3       | 2.171 | 0.000 | 30.297  | 13.449 |
| ENSG00000127472 | PLA2G5       | 2.171 | 0.015 | 0.159   | 0.054  |
| ENSG00000187664 | HAPLN4       | 2.171 | 0.007 | 0.720   | 0.285  |
| ENSG00000250218 | ALDH1L1-AS1  | 2.169 | 0.013 | 3.867   | 1.376  |
| ENSG00000168032 | ENTPD3       | 2.169 | 0.010 | 1.376   | 0.535  |
| ENSG00000242766 | IGKV1D-17    | 2.166 | 0.031 | 8.766   | 2.022  |
| ENSG00000075275 | CELSR1       | 2.164 | 0.001 | 1.601   | 0.676  |
| ENSG00000259479 | CTD-2008A1.2 | 2.162 | 0.001 | 0.731   | 0.318  |
| ENSG00000128918 | ALDH1A2      | 2.162 | 0.029 | 0.470   | 0.139  |
| ENSG00000198113 | TOR4A        | 2.162 | 0.000 | 26.710  | 12.483 |
| ENSG00000213889 | PPM1N        | 2.160 | 0.000 | 0.841   | 0.368  |
| ENSG00000180801 | ARSJ         | 2.159 | 0.002 | 3.420   | 1.443  |
| ENSG00000182492 | BGN          | 2.157 | 0.002 | 4.522   | 1.901  |
| ENSG00000211662 | IGLV3-21     | 2.157 | 0.020 | 214.949 | 74.939 |
| ENSG00000152784 | PRDM8        | 2.157 | 0.006 | 0.934   | 0.367  |
| ENSG00000144452 | ABCA12       | 2.156 | 0.031 | 0.078   | 0.007  |
| ENSG00000165084 | C8orf34      | 2.152 | 0.032 | 0.028   | 0.007  |
| ENSG00000160716 | CHRNA2       | 2.152 | 0.005 | 0.162   | 0.066  |
| ENSG00000104881 | PPP1R13L     | 2.152 | 0.000 | 9.225   | 4.222  |
| ENSG00000220494 | YAP1P1       | 2.150 | 0.031 | 0.205   | 0.055  |

|                 |               |       |       |         |        |
|-----------------|---------------|-------|-------|---------|--------|
| ENSG00000182795 | C1orf116      | 2.150 | 0.000 | 24.538  | 11.275 |
| ENSG00000124920 | MYRF          | 2.146 | 0.001 | 6.748   | 2.901  |
| ENSG00000204618 | RNF39         | 2.145 | 0.000 | 5.548   | 2.565  |
| ENSG00000069482 | GAL           | 2.143 | 0.025 | 0.382   | 0.122  |
| ENSG00000185467 | KPNA7         | 2.143 | 0.001 | 0.989   | 0.426  |
| ENSG00000219891 | ZSCAN12P1     | 2.143 | 0.001 | 1.715   | 0.752  |
| ENSG00000002587 | HS3ST1        | 2.140 | 0.000 | 1.626   | 0.770  |
| ENSG00000073737 | DHRS9         | 2.140 | 0.000 | 104.704 | 47.732 |
| ENSG00000254829 | RP11-7I15.3   | 2.140 | 0.000 | 22.884  | 10.260 |
| ENSG00000244300 | RP11-475N22.4 | 2.139 | 0.025 | 0.722   | 0.247  |
| ENSG00000131188 | PRR7          | 2.135 | 0.000 | 0.893   | 0.403  |
| ENSG00000166401 | SERPINB8      | 2.134 | 0.000 | 7.606   | 3.537  |
| ENSG00000184544 | DHRS7C        | 2.133 | 0.014 | 0.818   | 0.308  |
| ENSG00000186806 | VSIG10L       | 2.133 | 0.004 | 1.797   | 0.770  |
| ENSG00000148053 | NTRK2         | 2.133 | 0.004 | 1.579   | 0.671  |
| ENSG00000147889 | CDKN2A        | 2.132 | 0.001 | 0.539   | 0.237  |
| ENSG00000107819 | SFXN3         | 2.131 | 0.000 | 9.580   | 4.482  |
| ENSG00000136110 | LECT1         | 2.131 | 0.035 | 0.424   | 0.067  |
| ENSG00000126368 | NR1D1         | 2.130 | 0.000 | 9.046   | 4.078  |
| ENSG00000196091 | MYBPC1        | 2.129 | 0.016 | 1.065   | 0.407  |
| ENSG00000256394 | ASIC5         | 2.126 | 0.029 | 0.119   | 0.017  |
| ENSG00000258504 | RP11-638I2.6  | 2.125 | 0.000 | 14.350  | 6.598  |
| ENSG00000130600 | H19           | 2.125 | 0.019 | 0.811   | 0.298  |
| ENSG00000171346 | KRT15         | 2.123 | 0.001 | 3.416   | 1.506  |
| ENSG00000003249 | DBNDD1        | 2.123 | 0.004 | 2.843   | 1.179  |
| ENSG00000205578 | POM121B       | 2.122 | 0.027 | 0.150   | 0.048  |
| ENSG00000204540 | PSORS1C1      | 2.121 | 0.002 | 3.634   | 1.581  |
| ENSG00000188660 | LINC00319     | 2.120 | 0.015 | 0.191   | 0.072  |
| ENSG00000181072 | CHRM2         | 2.118 | 0.036 | 0.046   | 0.009  |
| ENSG00000203499 | FAM83H-AS1    | 2.114 | 0.000 | 3.061   | 1.425  |
| ENSG00000173846 | PLK3          | 2.113 | 0.000 | 4.281   | 2.009  |
| ENSG00000188643 | S100A16       | 2.113 | 0.000 | 207.012 | 96.928 |
| ENSG00000196923 | PDLIM7        | 2.112 | 0.000 | 5.268   | 2.463  |
| ENSG00000137198 | GMPR          | 2.111 | 0.001 | 1.800   | 0.791  |
| ENSG00000257766 | RP11-341G23.3 | 2.109 | 0.009 | 2.164   | 0.890  |
| ENSG00000084734 | GCKR          | 2.105 | 0.036 | 0.106   | 0.029  |
| ENSG00000101194 | SLC17A9       | 2.099 | 0.001 | 14.267  | 6.477  |
| ENSG00000228146 | CASP16        | 2.098 | 0.008 | 2.202   | 0.919  |
| ENSG00000116260 | QSOX1         | 2.098 | 0.000 | 73.914  | 35.225 |
| ENSG00000101255 | TRIB3         | 2.097 | 0.002 | 3.348   | 1.471  |
| ENSG00000181524 | RPL24P4       | 2.096 | 0.008 | 2.405   | 0.966  |
| ENSG00000176907 | C8orf4        | 2.093 | 0.010 | 35.556  | 14.837 |
| ENSG00000064666 | CNN2          | 2.092 | 0.000 | 39.731  | 19.035 |
| ENSG00000253998 | IGKV2-29      | 2.091 | 0.030 | 2.701   | 1.980  |
| ENSG00000196843 | ARID5A        | 2.090 | 0.000 | 5.042   | 2.439  |
| ENSG00000257433 | RP1-197B17.3  | 2.084 | 0.001 | 1.198   | 0.547  |
| ENSG00000173557 | C2orf70       | 2.081 | 0.008 | 0.781   | 0.323  |

|                 |               |       |       |          |         |
|-----------------|---------------|-------|-------|----------|---------|
| ENSG00000226180 | AC010536.1    | 2.081 | 0.007 | 0.232    | 0.098   |
| ENSG00000255674 | AC013718.1    | 2.081 | 0.022 | 1.489    | 0.564   |
| ENSG00000172137 | CALB2         | 2.080 | 0.020 | 0.829    | 0.314   |
| ENSG00000250261 | AC007050.18   | 2.078 | 0.000 | 2.415    | 1.124   |
| ENSG00000075340 | ADD2          | 2.078 | 0.036 | 0.077    | 0.026   |
| ENSG00000204889 | KRT40         | 2.076 | 0.010 | 0.779    | 0.331   |
| ENSG00000230825 | AC005532.5    | 2.074 | 0.040 | 0.659    | 0.205   |
| ENSG00000232756 | RP5-1185I7.1  | 2.074 | 0.000 | 2.403    | 1.105   |
| ENSG00000253785 | CTC-308K20.3  | 2.071 | 0.006 | 0.668    | 0.290   |
| ENSG00000105290 | APLP1         | 2.070 | 0.002 | 0.542    | 0.246   |
| ENSG00000174567 | GOLT1A        | 2.069 | 0.001 | 7.594    | 3.449   |
| ENSG00000167157 | PRRX2         | 2.067 | 0.005 | 0.676    | 0.291   |
| ENSG00000107338 | SHB           | 2.066 | 0.000 | 10.092   | 4.984   |
| ENSG00000171345 | KRT19         | 2.065 | 0.000 | 1080.091 | 523.643 |
| ENSG00000164822 | DEFA6         | 2.065 | 0.045 | 1.510    | 3.719   |
| ENSG00000169174 | PCSK9         | 2.063 | 0.029 | 10.564   | 3.867   |
| ENSG00000163518 | FCRL4         | 2.062 | 0.028 | 0.313    | 0.116   |
| ENSG00000165810 | BTNL9         | 2.055 | 0.000 | 1.986    | 0.936   |
| ENSG00000165188 | RNF183        | 2.055 | 0.007 | 0.336    | 0.145   |
| ENSG00000055813 | CCDC85A       | 2.051 | 0.024 | 0.544    | 0.214   |
| ENSG00000257588 | RP11-469H8.6  | 2.049 | 0.018 | 0.210    | 0.000   |
| ENSG00000142765 | SYTL1         | 2.049 | 0.000 | 5.435    | 2.624   |
| ENSG00000128709 | HOXD9         | 2.046 | 0.032 | 5.166    | 2.004   |
| ENSG00000029153 | ARNTL2        | 2.046 | 0.000 | 2.152    | 1.018   |
| ENSG00000131019 | ULBP3         | 2.045 | 0.011 | 0.505    | 0.217   |
| ENSG00000254521 | SIGLEC12      | 2.044 | 0.018 | 1.503    | 0.606   |
| ENSG00000136840 | ST6GALNAC4    | 2.044 | 0.000 | 17.237   | 8.328   |
| ENSG00000211658 | IGLV3-27      | 2.043 | 0.030 | 13.217   | 5.028   |
| ENSG00000182378 | PLCXD1        | 2.042 | 0.000 | 0.493    | 0.233   |
| ENSG00000189120 | SP6           | 2.042 | 0.002 | 3.084    | 1.439   |
| ENSG00000172738 | TMEM217       | 2.041 | 0.000 | 1.075    | 0.522   |
| ENSG00000135625 | EGR4          | 2.041 | 0.034 | 0.093    | 0.008   |
| ENSG00000174348 | PODN          | 2.041 | 0.000 | 2.282    | 1.101   |
| ENSG00000259078 | PTBP1P        | 2.038 | 0.041 | 0.287    | 0.096   |
| ENSG00000232993 | RP11-334A14.5 | 2.036 | 0.002 | 3.721    | 1.725   |
| ENSG00000253227 | RP11-383J24.1 | 2.035 | 0.048 | 0.976    | 0.273   |
| ENSG00000197099 | RP11-573D15.8 | 2.035 | 0.036 | 0.634    | 0.217   |
| ENSG00000237223 | SULT1C2P1     | 2.034 | 0.043 | 0.222    | 0.082   |
| ENSG00000116039 | ATP6V1B1      | 2.034 | 0.026 | 0.435    | 0.102   |
| ENSG00000175793 | SFN           | 2.032 | 0.000 | 208.138  | 101.014 |
| ENSG00000140961 | OSGIN1        | 2.029 | 0.000 | 7.601    | 3.707   |
| ENSG00000112299 | VNN1          | 2.028 | 0.046 | 4.150    | 1.309   |
| ENSG00000090530 | LEPREL1       | 2.026 | 0.004 | 9.335    | 4.251   |
| ENSG00000176485 | PLA2G16       | 2.026 | 0.005 | 3.134    | 1.397   |
| ENSG00000147168 | IL2RG         | 2.025 | 0.000 | 88.967   | 43.419  |
| ENSG00000227947 | RP11-543D5.1  | 2.022 | 0.027 | 0.561    | 0.216   |
| ENSG00000233138 | RP1-67K17.3   | 2.018 | 0.000 | 4.795    | 2.344   |

|                 |                |        |       |         |         |
|-----------------|----------------|--------|-------|---------|---------|
| ENSG00000085063 | CD59           | 2.016  | 0.000 | 81.271  | 40.476  |
| ENSG00000242407 | CTD-2377D24.4  | 2.010  | 0.040 | 5.846   | 1.848   |
| ENSG00000164761 | TNFRSF11B      | 2.006  | 0.002 | 3.707   | 1.741   |
| ENSG00000151689 | INPP1          | 2.005  | 0.000 | 16.636  | 8.416   |
| ENSG00000123989 | CHPF           | 2.005  | 0.000 | 17.992  | 8.883   |
| ENSG00000148926 | ADM            | 2.005  | 0.003 | 20.128  | 9.377   |
| ENSG00000008513 | ST3GAL1        | 2.004  | 0.002 | 4.172   | 1.552   |
| ENSG00000232874 | RP11-135A1.2   | 2.004  | 0.007 | 1.689   | 0.746   |
| ENSG00000203801 | LINC00222      | 2.002  | 0.026 | 0.127   | 0.053   |
| ENSG00000107864 | CPEB3          | -2.001 | 0.000 | 1.193   | 2.619   |
| ENSG00000166796 | LDHC           | -2.002 | 0.036 | 0.018   | 0.328   |
| ENSG00000173320 | STOX2          | -2.002 | 0.025 | 0.073   | 0.192   |
| ENSG00000166035 | LIPC           | -2.006 | 0.010 | 0.244   | 0.602   |
| ENSG00000095110 | NXPE1          | -2.006 | 0.000 | 24.046  | 53.257  |
| ENSG00000258604 | AL161668.5     | -2.008 | 0.003 | 0.925   | 2.151   |
| ENSG00000228032 | C14orf144      | -2.008 | 0.046 | 0.119   | 0.404   |
| ENSG00000123700 | KCNJ2          | -2.009 | 0.001 | 1.768   | 4.024   |
| ENSG00000151834 | GABRA2         | -2.011 | 0.010 | 0.328   | 0.813   |
| ENSG00000174136 | RGMB           | -2.014 | 0.000 | 6.185   | 13.387  |
| ENSG00000108576 | SLC6A4         | -2.015 | 0.036 | 0.073   | 0.212   |
| ENSG00000147650 | LRP12          | -2.018 | 0.000 | 0.535   | 1.162   |
| ENSG00000257315 | ZBED6          | -2.018 | 0.037 | 0.696   | 1.943   |
| ENSG00000154269 | ENPP3          | -2.022 | 0.000 | 2.960   | 6.591   |
| ENSG00000163106 | HPGDS          | -2.024 | 0.003 | 1.469   | 3.459   |
| ENSG00000241732 | RP11-38P22.2   | -2.025 | 0.000 | 4.873   | 11.107  |
| ENSG00000123610 | TNFAIP6        | -2.026 | 0.013 | 0.148   | 0.387   |
| ENSG00000230731 | RP11-478K15.6  | -2.027 | 0.016 | 0.966   | 2.581   |
| ENSG00000016490 | CLCA1          | -2.027 | 0.037 | 302.746 | 896.092 |
| ENSG00000257489 | RP11-175P13.3  | -2.027 | 0.001 | 0.908   | 2.065   |
| ENSG00000259540 | RP11-526I2.1   | -2.029 | 0.039 | 0.235   | 0.687   |
| ENSG00000169271 | HSPB3          | -2.029 | 0.050 | 0.501   | 2.855   |
| ENSG00000226087 | AC106869.2     | -2.030 | 0.018 | 0.596   | 1.593   |
| ENSG00000214797 | RP11-1036E20.9 | -2.032 | 0.032 | 0.067   | 0.204   |
| ENSG00000185640 | KRT79          | -2.032 | 0.046 | 0.007   | 0.056   |
| ENSG00000226306 | NPY6R          | -2.033 | 0.010 | 0.987   | 2.396   |
| ENSG00000106772 | PRUNE2         | -2.033 | 0.000 | 1.122   | 2.515   |
| ENSG00000167768 | KRT1           | -2.034 | 0.050 | 0.137   | 0.668   |
| ENSG00000165899 | OTOGL          | -2.037 | 0.036 | 0.017   | 0.054   |
| ENSG00000132517 | SLC52A1        | -2.038 | 0.019 | 0.283   | 0.760   |
| ENSG00000197128 | ZNF772         | -2.039 | 0.001 | 0.303   | 0.688   |
| ENSG00000183690 | EFHC2          | -2.040 | 0.000 | 0.277   | 0.625   |
| ENSG00000136492 | BRIP1          | -2.046 | 0.000 | 0.631   | 1.405   |
| ENSG00000227141 | RP11-545A16.3  | -2.049 | 0.037 | 0.037   | 0.121   |
| ENSG00000237707 | RP5-1018K9.1   | -2.053 | 0.046 | 0.104   | 0.423   |
| ENSG00000256139 | RP11-968O1.5   | -2.055 | 0.000 | 1.168   | 2.659   |
| ENSG00000141449 | GREB1L         | -2.056 | 0.027 | 0.025   | 0.074   |
| ENSG00000169860 | P2RY1          | -2.058 | 0.002 | 2.906   | 6.901   |

|                 |                |        |       |       |        |
|-----------------|----------------|--------|-------|-------|--------|
| ENSG00000109819 | PPARGC1A       | -2.059 | 0.005 | 2.421 | 6.050  |
| ENSG00000184040 | TMEM236        | -2.060 | 0.025 | 0.524 | 1.558  |
| ENSG00000203546 | RP11-176H8.1   | -2.061 | 0.001 | 1.710 | 3.949  |
| ENSG00000198270 | TMEM116        | -2.063 | 0.000 | 0.516 | 1.186  |
| ENSG00000250305 | KIAA1456       | -2.065 | 0.000 | 0.577 | 1.325  |
| ENSG00000178075 | GRAMD1C        | -2.066 | 0.000 | 1.527 | 3.462  |
| ENSG00000182223 | ZAR1           | -2.069 | 0.002 | 0.307 | 0.737  |
| ENSG00000236937 | PTGES3P4       | -2.076 | 0.005 | 1.090 | 2.703  |
| ENSG00000049130 | KITLG          | -2.076 | 0.000 | 4.750 | 10.546 |
| ENSG00000161048 | NAPEPLD        | -2.083 | 0.000 | 5.692 | 12.831 |
| ENSG00000184984 | CHRM5          | -2.084 | 0.004 | 0.083 | 0.212  |
| ENSG00000115841 | RMDN2          | -2.084 | 0.000 | 1.662 | 3.926  |
| ENSG00000073711 | PPP2R3A        | -2.090 | 0.002 | 1.583 | 3.914  |
| ENSG00000131126 | TEX101         | -2.091 | 0.036 | 0.075 | 0.291  |
| ENSG00000151150 | ANK3           | -2.092 | 0.000 | 1.405 | 3.231  |
| ENSG00000187510 | PLEKHG7        | -2.099 | 0.002 | 0.186 | 0.458  |
| ENSG00000234460 | Xyac-YM21GA2.4 | -2.103 | 0.033 | 0.200 | 0.768  |
| ENSG00000185245 | GP1BA          | -2.104 | 0.001 | 0.411 | 0.997  |
| ENSG00000197594 | ENPP1          | -2.106 | 0.000 | 1.679 | 3.873  |
| ENSG00000248690 | HAS2-AS1       | -2.111 | 0.001 | 0.209 | 0.517  |
| ENSG00000239205 | RP11-747D18.1  | -2.112 | 0.007 | 1.028 | 2.765  |
| ENSG00000216560 | LINC00955      | -2.112 | 0.038 | 0.397 | 1.992  |
| ENSG00000224812 | TMEM72-AS1     | -2.113 | 0.012 | 0.049 | 0.141  |
| ENSG00000228307 | OR2S1P         | -2.115 | 0.004 | 0.400 | 1.046  |
| ENSG00000100505 | TRIM9          | -2.115 | 0.022 | 0.188 | 0.575  |
| ENSG00000250328 | CTC-210G5.1    | -2.117 | 0.034 | 0.134 | 0.502  |
| ENSG00000179750 | APOBEC3B       | -2.118 | 0.001 | 4.549 | 11.220 |
| ENSG00000225972 | MTND1P23       | -2.120 | 0.005 | 1.397 | 3.814  |
| ENSG00000182397 | DNM1P46        | -2.122 | 0.025 | 0.025 | 0.085  |
| ENSG00000180279 | CTD-2568A17.5  | -2.124 | 0.034 | 0.070 | 0.307  |
| ENSG00000204361 | NXPE2          | -2.129 | 0.000 | 2.273 | 5.425  |
| ENSG00000246090 | RP11-696N14.1  | -2.133 | 0.000 | 0.313 | 0.739  |
| ENSG00000138308 | PLA2G12B       | -2.136 | 0.004 | 1.601 | 4.231  |
| ENSG00000110975 | SYT10          | -2.139 | 0.015 | 0.035 | 0.101  |
| ENSG00000246763 | RGMB-AS1       | -2.140 | 0.000 | 1.138 | 2.743  |
| ENSG00000108381 | ASPA           | -2.142 | 0.000 | 0.348 | 0.820  |
| ENSG00000242435 | UPK3BP1        | -2.148 | 0.007 | 0.467 | 1.271  |
| ENSG00000234828 | RP11-526A4.1   | -2.154 | 0.005 | 0.120 | 0.337  |
| ENSG00000080293 | SCTR           | -2.160 | 0.006 | 0.203 | 0.554  |
| ENSG00000132854 | KANK4          | -2.162 | 0.001 | 0.224 | 0.565  |
| ENSG00000254453 | NAV2-AS2       | -2.163 | 0.013 | 0.408 | 1.186  |
| ENSG00000154874 | CCDC144B       | -2.163 | 0.023 | 0.010 | 0.032  |
| ENSG00000184368 | MAP7D2         | -2.165 | 0.002 | 0.251 | 0.647  |
| ENSG00000164129 | NPY5R          | -2.169 | 0.027 | 0.023 | 0.089  |
| ENSG00000186462 | NAP1L2         | -2.169 | 0.000 | 0.865 | 2.173  |
| ENSG00000110887 | DAO            | -2.173 | 0.005 | 0.324 | 0.937  |
| ENSG00000100206 | DMC1           | -2.176 | 0.000 | 0.135 | 0.340  |

|                 |               |        |       |        |         |
|-----------------|---------------|--------|-------|--------|---------|
| ENSG00000259589 | RP11-317G6.1  | -2.180 | 0.018 | 0.582  | 1.857   |
| ENSG00000113805 | CNTN3         | -2.183 | 0.000 | 1.155  | 2.748   |
| ENSG00000230666 | CEACAM22P     | -2.186 | 0.008 | 0.094  | 0.280   |
| ENSG00000170166 | HOXD4         | -2.188 | 0.000 | 1.763  | 4.290   |
| ENSG00000146530 | VWDE          | -2.191 | 0.004 | 0.078  | 0.216   |
| ENSG00000005469 | CROT          | -2.191 | 0.000 | 3.056  | 7.529   |
| ENSG00000177398 | UMODL1        | -2.195 | 0.003 | 0.041  | 0.110   |
| ENSG00000173930 | SLCO4C1       | -2.196 | 0.005 | 0.187  | 0.516   |
| ENSG00000152785 | BMP3          | -2.204 | 0.023 | 3.095  | 11.965  |
| ENSG00000164488 | DACT2         | -2.210 | 0.001 | 0.303  | 0.799   |
| ENSG00000250538 | RP11-92A5.2   | -2.210 | 0.024 | 0.026  | 0.211   |
| ENSG00000156486 | KCNS2         | -2.211 | 0.024 | 0.033  | 0.138   |
| ENSG00000167080 | B4GALNT2      | -2.215 | 0.021 | 6.613  | 24.989  |
| ENSG00000236732 | AC094019.4    | -2.223 | 0.024 | 0.183  | 0.798   |
| ENSG00000218265 | RPS4XP7       | -2.226 | 0.003 | 0.398  | 1.118   |
| ENSG00000154654 | NCAM2         | -2.230 | 0.005 | 0.022  | 0.066   |
| ENSG00000112902 | SEMA5A        | -2.246 | 0.000 | 2.832  | 7.163   |
| ENSG00000172955 | ADH6          | -2.250 | 0.000 | 2.920  | 7.211   |
| ENSG00000248256 | OCIAD1-AS1    | -2.252 | 0.000 | 1.788  | 4.703   |
| ENSG00000188620 | HMX3          | -2.255 | 0.009 | 0.102  | 0.327   |
| ENSG00000135097 | MSI1          | -2.277 | 0.002 | 0.248  | 0.718   |
| ENSG00000108187 | PBLD          | -2.280 | 0.000 | 7.055  | 19.231  |
| ENSG00000155850 | SLC26A2       | -2.302 | 0.007 | 95.746 | 318.188 |
| ENSG00000109743 | BST1          | -2.307 | 0.000 | 0.807  | 2.098   |
| ENSG00000251468 | RP11-369K16.1 | -2.308 | 0.002 | 0.229  | 0.676   |
| ENSG00000145864 | GABRB2        | -2.309 | 0.000 | 0.143  | 0.376   |
| ENSG00000179520 | SLC17A8       | -2.312 | 0.001 | 0.222  | 0.629   |
| ENSG00000147256 | ARHGAP36      | -2.314 | 0.009 | 0.037  | 0.143   |
| ENSG00000183117 | CSMD1         | -2.314 | 0.007 | 0.008  | 0.029   |
| ENSG00000162670 | BRINP3        | -2.316 | 0.006 | 0.941  | 3.095   |
| ENSG00000164756 | SLC30A8       | -2.327 | 0.012 | 0.014  | 0.062   |
| ENSG00000225421 | AC019330.1    | -2.335 | 0.009 | 0.266  | 0.954   |
| ENSG00000168229 | PTGDR         | -2.336 | 0.000 | 3.236  | 8.579   |
| ENSG00000162039 | MEIOB         | -2.341 | 0.001 | 0.140  | 0.408   |
| ENSG00000118596 | SLC16A7       | -2.347 | 0.000 | 0.089  | 0.253   |
| ENSG00000137558 | PI15          | -2.358 | 0.007 | 0.095  | 0.342   |
| ENSG00000181374 | CCL13         | -2.359 | 0.006 | 4.641  | 16.476  |
| ENSG00000166845 | C18orf54      | -2.360 | 0.000 | 0.353  | 0.909   |
| ENSG00000204936 | CD177         | -2.360 | 0.008 | 69.521 | 267.494 |
| ENSG00000248161 | RP11-499E18.1 | -2.361 | 0.000 | 0.362  | 1.026   |
| ENSG00000008086 | CDKL5         | -2.365 | 0.013 | 0.063  | 0.266   |
| ENSG00000138669 | PRKG2         | -2.365 | 0.004 | 1.299  | 4.282   |
| ENSG00000102010 | BMX           | -2.370 | 0.000 | 0.936  | 2.632   |
| ENSG00000168314 | MOBP          | -2.370 | 0.002 | 0.064  | 0.196   |
| ENSG00000231181 | RP13-15M17.1  | -2.378 | 0.001 | 0.403  | 1.211   |
| ENSG00000236107 | AC010127.3    | -2.386 | 0.001 | 0.125  | 0.374   |
| ENSG00000242553 | AP001432.14   | -2.389 | 0.003 | 0.286  | 0.926   |

|                 |                |        |       |        |        |
|-----------------|----------------|--------|-------|--------|--------|
| ENSG00000148942 | SLC5A12        | -2.395 | 0.001 | 0.053  | 0.166  |
| ENSG00000178248 | AP000345.1     | -2.397 | 0.013 | 0.087  | 0.732  |
| ENSG00000069018 | TRPC7          | -2.407 | 0.001 | 0.087  | 0.266  |
| ENSG00000138079 | SLC3A1         | -2.415 | 0.000 | 5.046  | 13.475 |
| ENSG00000196090 | PTPRT          | -2.415 | 0.003 | 0.026  | 0.092  |
| ENSG00000169432 | SCN9A          | -2.417 | 0.000 | 0.706  | 2.121  |
| ENSG00000137561 | TTPA           | -2.417 | 0.000 | 1.604  | 4.307  |
| ENSG00000250619 | CTD-2215L10.1  | -2.424 | 0.000 | 1.384  | 3.984  |
| ENSG00000128383 | APOBEC3A       | -2.427 | 0.007 | 0.289  | 1.114  |
| ENSG00000107105 | ELAVL2         | -2.436 | 0.001 | 0.072  | 0.226  |
| ENSG00000257335 | MGAM           | -2.453 | 0.000 | 0.081  | 0.227  |
| ENSG00000230519 | RP11-1060J15.5 | -2.468 | 0.001 | 0.752  | 2.425  |
| ENSG00000225811 | RP11-547I7.1   | -2.481 | 0.002 | 0.306  | 1.074  |
| ENSG00000151338 | MIPOL1         | -2.486 | 0.000 | 0.304  | 0.864  |
| ENSG00000135220 | UGT2A3         | -2.487 | 0.001 | 12.759 | 42.061 |
| ENSG00000257482 | ZNF727         | -2.509 | 0.007 | 0.040  | 0.205  |
| ENSG00000187783 | TMEM72         | -2.511 | 0.000 | 4.126  | 12.512 |
| ENSG00000144619 | CNTN4          | -2.519 | 0.000 | 0.463  | 1.337  |
| ENSG00000243083 | LINC00870      | -2.540 | 0.000 | 0.096  | 0.311  |
| ENSG00000138741 | TRPC3          | -2.546 | 0.004 | 0.042  | 0.183  |
| ENSG00000150893 | FREM2          | -2.555 | 0.000 | 0.026  | 0.084  |
| ENSG00000138315 | OIT3           | -2.577 | 0.000 | 0.245  | 0.800  |
| ENSG00000233327 | USP32P2        | -2.580 | 0.005 | 0.067  | 0.347  |
| ENSG00000171126 | KCNG3          | -2.645 | 0.000 | 0.060  | 0.221  |
| ENSG00000112232 | KHDRBS2        | -2.652 | 0.001 | 0.115  | 0.463  |
| ENSG00000156869 | FRRS1          | -2.688 | 0.000 | 1.369  | 4.219  |
| ENSG00000258918 | RP11-219E7.4   | -2.692 | 0.003 | 0.123  | 0.794  |
| ENSG00000135917 | SLC19A3        | -2.698 | 0.000 | 1.056  | 3.511  |
| ENSG00000259381 | RP11-192M23.1  | -2.701 | 0.002 | 0.117  | 0.484  |
| ENSG00000137975 | CLCA2          | -2.717 | 0.000 | 0.157  | 0.591  |
| ENSG00000187398 | LUZP2          | -2.718 | 0.000 | 0.134  | 0.424  |
| ENSG00000144820 | GPR128         | -2.742 | 0.000 | 1.321  | 4.399  |
| ENSG00000180347 | CCDC129        | -2.750 | 0.001 | 0.107  | 0.420  |
| ENSG00000236935 | AP003774.1     | -2.772 | 0.000 | 1.543  | 5.513  |
| ENSG00000108700 | CCL8           | -2.805 | 0.000 | 1.076  | 4.517  |
| ENSG00000258483 | AC144835.1     | -2.831 | 0.002 | 0.179  | 1.138  |
| ENSG00000224984 | RP11-524H19.2  | -2.869 | 0.000 | 0.481  | 1.730  |
| ENSG00000203691 | AC092811.1     | -2.927 | 0.000 | 0.117  | 0.484  |
| ENSG00000233215 | AP000472.2     | -2.958 | 0.001 | 0.075  | 0.419  |
| ENSG00000165192 | ASB11          | -2.964 | 0.001 | 0.019  | 0.107  |
| ENSG00000164794 | KCNV1          | -3.026 | 0.000 | 0.060  | 0.295  |
| ENSG00000165794 | SLC39A2        | -3.078 | 0.000 | 0.306  | 1.332  |
| ENSG00000123612 | ACVR1C         | -3.118 | 0.000 | 0.544  | 2.077  |
| ENSG00000160868 | CYP3A4         | -3.210 | 0.000 | 4.123  | 7.974  |
| ENSG00000197415 | VEPH1          | -3.219 | 0.000 | 0.083  | 0.348  |
| ENSG00000185149 | NPY2R          | -3.263 | 0.000 | 0.020  | 0.199  |
| ENSG00000115386 | REG1A          | -3.307 | 0.000 | 7.191  | 1.244  |

|                 |              |        |       |       |       |
|-----------------|--------------|--------|-------|-------|-------|
| ENSG00000050030 | KIAA2022     | -3.361 | 0.000 | 0.058 | 0.269 |
| ENSG00000214652 | RP11-3N2.13  | -3.380 | 0.000 | 0.031 | 0.213 |
| ENSG00000226741 | CTA-929C8.6  | -3.540 | 0.000 | 0.009 | 0.076 |
| ENSG00000164270 | HTR4         | -3.761 | 0.000 | 0.216 | 0.978 |
| ENSG00000232175 | RP4-659I19.1 | -3.848 | 0.000 | 0.114 | 1.006 |
| ENSG00000081800 | SLC13A1      | -4.130 | 0.000 | 0.010 | 0.161 |
| ENSG00000138792 | ENPEP        | -5.074 | 0.000 | 0.090 | 0.702 |
| ENSG00000158516 | CPA2         | -5.178 | 0.000 | 0.025 | 0.590 |
