# Supplementary material
Source: PubMed Central journal article supplement (PMC4941619)
Supplement: NIHMS775743-supplement-7.pdf [file NIHMS775743-supplement-7.pdf]

| Ensembl_Name    | Gene_Symbol | NormalColo |        | Adenoma  |        | SSA/P_sporadi |        | SSA/P_syndromi |        | ControlRigh | SporadicRight | SyndromicRight | ControlLeft | SporadicLeft |
|-----------------|-------------|------------|--------|----------|--------|---------------|--------|----------------|--------|-------------|---------------|----------------|-------------|--------------|
|                 |             | n_Fold     | _Fold  | HPs_Fold | c_Fold | c_Fold        | t_RPKM | _RPKM          | _RPKM  | _RPKM       | _RPKM         |                |             |              |
| ENSG00000161798 | AQP5        | 1.000      | -1.068 | 1.807    | 13.786 | 40.429        | 0.021  | 0.026          | 0.009  | 0.019       | 0.007         |                |             |              |
| ENSG00000129451 | KLK10       | 1.000      | 2.872  | 1.634    | 14.670 | 37.774        | 0.161  | 0.128          | 0.265  | 0.120       | 0.209         |                |             |              |
| ENSG00000124233 | SEMG1       | 1.000      | 1.024  | 2.674    | 4.429  | 15.525        | 0.068  | 0.054          | 0.093  | 0.094       | 0.114         |                |             |              |
| ENSG00000146038 | DCDC2       | 1.000      | 1.524  | 2.470    | 5.520  | 14.394        | 0.242  | 0.221          | 0.247  | 0.677       | 0.556         |                |             |              |
| ENSG00000131910 | NR0B2       | 1.000      | 1.535  | 3.162    | 5.157  | 14.160        | 0.302  | 0.445          | 0.562  | 0.361       | 0.788         |                |             |              |
| ENSG00000135480 | KRT7        | 1.000      | 1.362  | 3.905    | 5.579  | 14.075        | 0.082  | 0.097          | 0.289  | 0.105       | 0.158         |                |             |              |
| ENSG00000087916 | SLC6A14     | 1.000      | 1.819  | 5.190    | 8.880  | 13.967        | 0.144  | 0.133          | 0.221  | 0.414       | 0.131         |                |             |              |
| ENSG00000257046 | LST3        | 1.000      | 1.188  | 2.895    | 3.819  | 13.630        | 0.011  | 0.016          | 0.001  | 0.008       | 0.028         |                |             |              |
| ENSG00000198203 | SULT1C2     | 1.000      | 1.305  | 2.713    | 7.137  | 13.470        | 0.361  | 0.205          | 0.506  | 1.354       | 0.668         |                |             |              |
| ENSG00000253368 | TRNP1       | 1.000      | 1.195  | 3.730    | 6.487  | 12.565        | 0.410  | 0.366          | 0.643  | 0.455       | 0.578         |                |             |              |
| ENSG00000124143 | ARHGAP40    | 1.000      | -1.015 | 2.325    | 5.211  | 11.973        | 0.000  | 0.000          | 0.007  | 0.009       | 0.004         |                |             |              |
| ENSG00000169876 | MUC17       | 1.000      | -1.057 | 2.666    | 4.505  | 11.624        | 2.631  | 1.899          | 1.022  | 6.605       | 4.101         |                |             |              |
| ENSG00000157064 | NMNAT2      | 1.000      | -1.058 | 3.141    | 3.851  | 11.559        | 0.049  | 0.034          | 0.029  | 0.036       | 0.011         |                |             |              |
| ENSG00000162366 | PDZK1IP1    | 1.000      | 2.423  | 2.998    | 7.234  | 11.446        | 9.664  | 18.003         | 30.984 | 14.771      | 18.511        |                |             |              |
| ENSG00000139800 | ZIC5        | 1.000      | 1.027  | 1.690    | 2.387  | 11.229        | 0.004  | 0.011          | 0.009  | 0.000       | 0.003         |                |             |              |
| ENSG00000128610 | FEZF1       | 1.000      | 1.170  | 2.695    | 7.462  | 11.192        | 0.003  | 0.008          | 0.010  | 0.009       | 0.006         |                |             |              |
| ENSG00000196260 | SFTA2       | 1.000      | -1.123 | 1.645    | 5.309  | 10.605        | 0.021  | 0.019          | 0.000  | 0.000       | 0.021         |                |             |              |
| ENSG00000043355 | ZIC2        | 1.000      | -1.073 | 2.980    | 2.566  | 10.348        | 0.043  | 0.070          | 0.084  | 0.019       | 0.021         |                |             |              |
| ENSG00000112299 | VNN1        | 1.000      | 1.502  | 2.028    | 5.214  | 10.054        | 0.573  | 0.659          | 0.798  | 1.309       | 0.740         |                |             |              |
| ENSG00000170786 | SDR16C5     | 1.000      | 1.802  | 3.248    | 7.215  | 9.977         | 2.268  | 4.170          | 2.917  | 3.862       | 4.424         |                |             |              |
| ENSG00000175592 | FOSL1       | 1.000      | 1.607  | 4.651    | 5.590  | 9.689         | 0.119  | 0.467          | 0.145  | 0.141       | 0.473         |                |             |              |
| ENSG00000124102 | PI3         | 1.000      | 1.909  | 1.928    | 3.727  | 9.644         | 11.121 | 20.340         | 59.709 | 44.933      | 39.381        |                |             |              |
| ENSG00000168631 | DPCR1       | 1.000      | -1.210 | 2.935    | 4.934  | 8.922         | 0.023  | 0.008          | 0.012  | 0.011       | 0.016         |                |             |              |
| ENSG00000184956 | MUC6        | 1.000      | -1.717 | 1.451    | 1.775  | 8.193         | 0.181  | 0.146          | 0.325  | 0.101       | 0.112         |                |             |              |
| ENSG00000119547 | ONECUT2     | 1.000      | 1.437  | 2.323    | 5.541  | 7.874         | 0.050  | 0.046          | 0.021  | 0.071       | 0.034         |                |             |              |
| ENSG00000163817 | SLC6A20     | 1.000      | -1.122 | 2.936    | 4.121  | 7.189         | 1.158  | 1.514          | 0.439  | 0.985       | 1.538         |                |             |              |
| ENSG00000181634 | TNFSF15     | 1.000      | 1.373  | 3.909    | 5.300  | 6.832         | 0.407  | 0.274          | 0.095  | 0.384       | 0.269         |                |             |              |

| Ensembl_Name    | Gene_Symbol | SSA/P_RPK |         | Ratio<br>(SSAP/HP) |
|-----------------|-------------|-----------|---------|--------------------|
|                 |             | M         | HP_RPKM |                    |
| ENSG00000134323 | MYCN        | 1.549     | 0.412   | 3.760              |
| ENSG00000172156 | CCL11       | 13.463    | 3.660   | 3.678              |
| ENSG00000075618 | FSCN1       | 8.638     | 2.360   | 3.661              |
| ENSG00000144908 | ALDH1L1     | 9.672     | 2.696   | 3.587              |
| ENSG00000151790 | TDO2        | 0.502     | 0.143   | 3.506              |
| ENSG00000120262 | CCDC170     | 0.568     | 0.202   | 2.811              |
| ENSG00000143590 | EFNA3       | 4.613     | 10.252  | -2.223             |
| ENSG00000132970 | WASF3       | 0.301     | 0.827   | -2.750             |
| ENSG00000141837 | CACNA1A     | 0.215     | 0.608   | -2.826             |
| ENSG00000140538 | NTRK3       | 0.029     | 0.084   | -2.928             |
| ENSG00000036565 | SLC18A1     | 0.499     | 1.477   | -2.959             |
| ENSG00000128709 | HOXD9       | 1.376     | 4.869   | -3.538             |
| ENSG00000108309 | RUNDC3A     | 0.193     | 0.685   | -3.543             |
| ENSG00000196549 | MME         | 0.197     | 0.731   | -3.715             |
| ENSG00000055813 | CCDC85A     | 0.126     | 0.512   | -4.063             |
| ENSG00000153132 | CLGN        | 0.096     | 0.395   | -4.127             |
| ENSG00000162761 | LMX1A       | 0.065     | 0.269   | -4.163             |
| ENSG00000166111 | SVOP        | 0.040     | 0.166   | -4.165             |
| ENSG00000079689 | SCGN        | 1.786     | 7.705   | -4.314             |
| ENSG00000163499 | CRYBA2      | 0.538     | 2.379   | -4.422             |
| ENSG00000129167 | TPH1        | 1.467     | 6.584   | -4.488             |
| ENSG00000132639 | SNAP25      | 0.072     | 0.335   | -4.644             |
| ENSG00000130294 | KIF1A       | 0.027     | 0.128   | -4.763             |
| ENSG00000125820 | NKX2-2      | 0.134     | 0.652   | -4.865             |
| ENSG00000148053 | NTRK2       | 0.302     | 1.501   | -4.969             |
| ENSG00000178171 | AMER3       | 0.028     | 0.141   | -5.110             |
| ENSG00000168754 | FAM178B     | 0.038     | 0.199   | -5.306             |
| ENSG00000128710 | HOXD10      | 1.504     | 10.082  | -6.705             |

| <u>Gene_Symbol</u> | <u>Description</u>                                                        |
|--------------------|---------------------------------------------------------------------------|
| ALDH1L1            | aldehyde dehydrogenase 1 family, member L1                                |
| AQP5               | aquaporin 5                                                               |
| CACNA1A            | calcium channel, voltage-dependent, P/Q type, alpha 1A subunit            |
| CCDC85A            | coiled-coil domain containing 85A                                         |
| CCL11              | chemokine (C-C motif) ligand 11                                           |
| CLGN               | calmegin                                                                  |
| CRYBA2             | crystallin, beta A2                                                       |
| DCDC2              | doublecortin domain containing 2                                          |
| DPCR1              | diffuse panbronchiolitis critical region 1                                |
| EFNA3              | ephrin-A3                                                                 |
| FAM178B            | family with sequence similarity 178, member B                             |
| FEZF1              | FEZ family zinc finger 1                                                  |
| FOSL1              | FOS-like antigen 1                                                        |
| FSCN1              | fascin actin-bundling protein 1                                           |
| HOXD10             | homeobox D10                                                              |
| HOXD9              | homeobox D9                                                               |
| KIF1A              | kinesin family member 1A                                                  |
| KLK10              | kallikrein-related peptidase 10                                           |
| KRT7               | keratin 7                                                                 |
| LMX1A              | LIM homeobox transcription factor 1, alpha                                |
| MME                | membrane metallo-endopeptidase                                            |
| MUC17              | mucin 17, cell surface associated                                         |
| MUC6               | mucin 6, oligomeric mucus/gel-forming                                     |
| MYCN               | v-myc avian myelocytomatosis viral oncogene neuroblastoma derived homolog |
| NKX2-2             | NK2 homeobox 2                                                            |
| NMNAT2             | nicotinamide nucleotide adenyltransferase 2                               |
| NROB2              | nuclear receptor subfamily 0, group B, member 2                           |
| NTRK2              | neurotrophic tyrosine kinase, receptor, type 2                            |
| NTRK3              | neurotrophic tyrosine kinase, receptor, type 3                            |
| ONECUT2            | one cut homeobox 2                                                        |
| PDZK1IP1           | PDZK1 interacting protein 1                                               |
| PI3                | peptidase inhibitor 3, skin-derived                                       |
| RUNDC3A            | RUN domain containing 3A                                                  |
| SCGN               | secretagogin, EF-hand calcium binding protein                             |
| SDR16C5            | short chain dehydrogenase/reductase family 16C, member 5                  |
| SEMG1              | semenogelin I                                                             |
| SFTA2              | surfactant associated 2                                                   |
| SLC18A1            | solute carrier family 18 (vesicular monoamine transporter), member 1      |
| SLC6A14            | solute carrier family 6 (amino acid transporter), member 14               |
| SLC6A20            | solute carrier family 6 (proline IMINO transporter), member 20            |
| SNAP25             | synaptosomal-associated protein, 25kDa                                    |
| SULT1C2            | sulfotransferase family, cytosolic, 1C, member 2                          |
| SVOP               | SV2 related protein homolog (rat)                                         |
| TDO2               | tryptophan 2,3-dioxygenase                                                |
| TNFSF15            | tumor necrosis factor (ligand) superfamily, member 15                     |
| TPH1               | tryptophan hydroxylase 1                                                  |

|       |                                  |
|-------|----------------------------------|
| TRNP1 | TMF1-regulated nuclear protein 1 |
| VNN1  | vanin 1                          |
| WASF3 | WAS protein family, member 3     |
| ZIC2  | Zic family member 2              |
| ZIC5  | Zic family member 5              |
